# Supplementary material
Source: PubMed Central journal article supplement (PMC4967560)
Supplement: NIHMS798658-supplement-2.pdf [file NIHMS798658-supplement-2.pdf]

1 Summary of Protocol Amendments

2

3 The study had a total of 6 amendments submitted to and approved by the IRB. All were  
4 minor and received expedited approval.

5

6 The original protocol was approved on 8/20/12. Patients were to be enrolled and  
7 randomized ***at the time of intubation***. However, the logistical issue of obtaining informed  
8 consent around the time of intubation made it impossible to enroll ***any*** patients. Since the  
9 majority of patients with hypoxemic respiratory failure initially were treated with face  
10 mask NIV, we amended the protocol (Amendment # 1, approved on 2/11/2013) to enroll  
11 patients while they were receiving noninvasive ventilation. This allowed adequate time so  
12 that all patients in the trial were enrolled before endotracheal intubation, while they were  
13 receiving face mask NIV.

14

15 Amendment #2 intended to broaden the study population from hypoxemic to all types  
16 of respiratory failure (i.e. hypoxemic, ventilator and shock). This amendment was approved  
17 on 5/22/2013. However, over the complete course of the study, the ***only*** patients ever  
18 enrolled in the trial had hypoxemic respiratory failure, specifically ARDS.

19

20 Amendment #3 involved personnel changes that reflected supportive staff that had left  
21 our institution and therefore were no longer involved in the study. This amendment was  
22 approved on 6/27/2013.

23

24 Amendment #4 involved personnel changes that reflected supportive staff that had left  
25 our institution and therefore were no longer involved in the study. This amendment was  
26 approved on 7/10/2013.

27

28 Amendment #5 involved personnel changes that reflected supportive staff that had left  
29 our institution and therefore were no longer involved in the study. This amendment was  
30 approved on 2/27/2015.

31

32 Amendment #6 corrected a mathematical error in the statistical analysis plan. This  
33 amendment was approved on 4/28/2015.

34

35

36 **ORIGINAL PROTOCOL**

37 **Title:** Mechanical Ventilation in Patients with Shock and/or Hypoxemic Respiratory  
38 Failure: A Comparison of Endotracheal Intubation and Non Invasive Ventilation via a  
39 Helmet Device

40  
41 **Date:** August 20, 2012

42  
43 **Principle Investigators:**

- 44 • Bhakti Patel, MD. Fellow, Section of Pulmonary and Critical Care Medicine
- 45 • Margaret Davis Hovda, MD Fellow, Section of Pulmonary and Critical Care Medicine
- 46 • Jared Greenberg, MD, Fellow, Section of Pulmonary and Critical Care Medicine
- 47 • Shruti B. Patel, MD Fellow, Section of Pulmonary and Critical Care Medicine
- 48 • John P. Kress, MD. Professor, Section of Pulmonary and Critical Care Medicine
- 49 • Anne Pohlman, APN-CNS, Coordinator Clinical Research
- 50 • Jesse B. Hall, MD. Professor, Section of Pulmonary and Critical Care Medicine

51  
52 **Background:**

53 Respiratory failure characterized by acute deterioration of gas exchange is often treated  
54 with endotracheal intubation and mechanical ventilation (figure 1). Similarly, the classic  
55 teaching in the treatment of patients with shock required intubation to “take away the  
56 work of breathing.” Although, the institution of mechanical ventilation is considered life  
57 saving, the associated complications of tracheal stenosis,<sup>i</sup> ventilator associated  
58 pneumonia,<sup>ii</sup> barotrauma<sup>iii</sup>, and neuromuscular weakness<sup>iv</sup> are not without considerable  
59 morbidity and mortality.

60  
61 Over the past years non-invasive ventilation delivered by facemask (figure 2) has become  
62 an attractive option to improve gas exchange without an artificial airway, thus preserving  
63 airway defense mechanisms, speech and swallow capabilities, and allowing interaction  
64 between patients and care providers while avoiding the complications of endotracheal  
65 intubation. This strategy of non-invasive ventilation has demonstrated significant mortality  
66 benefit in patients with hypercapnic respiratory failure from COPD,<sup>v,vi</sup> acute cardiogenic  
67 pulmonary edema,<sup>vii,viii</sup> and hypoxemic respiratory failure in immunocompromised  
68 patients.<sup>ix,x</sup> In addition to successfully avoiding endotracheal intubation, non-invasive  
69 ventilation has been used to successfully liberate patients from mechanical ventilation via an  
70 endotracheal tube to extubation and transition to non-invasive mechanical ventilation. As such  
71 non-invasive ventilation has been a standard therapy for certain types of respiratory  
72 failure for more than 15 years.

73  
74 Despite the advantages of non-invasive ventilation, up to forty percent of patients fail  
75 facemask trials in part because of mask intolerance and severity of disease.<sup>xi</sup> Some common  
76 complications contributing to mask intolerance include claustrophobia, nasal bridge skin  
77 necrosis, acneiform rash, and conjunctivitis and if present prompt premature

78 discontinuation of non-invasive ventilation and endotracheal intubation. Further limitation  
79 to facemask non-invasive ventilation is that the seal integrity is lost when higher pressures  
80 are required. For example, non-invasive ventilation via a nasal or full face mask typically  
81 begins to demonstrate leaks when the pressures required exceed 15-20 cm H<sub>2</sub>O.  
82 Unfortunately, certain types of respiratory failure such as that due to hypoxemia or shock  
83 may require such higher pressures. In an attempt to improve patient tolerability and  
84 deliver higher pressures, a transparent helmet has been proposed as a novel interface for  
85 non-invasive ventilation. The helmet is made of transparent latex-free PVC with a soft  
86 collar that adheres to the neck ensuring a seal when inflated (figure 3). It encloses the  
87 entire head and neck of the patient and is secured by two armpit braces. The design of the  
88 helmet confers some important advantages: 1) the transparency allows the patient to  
89 interact with the environment; 2) the lack of contact to the face lowers the risk of skin  
90 necrosis; 3) the helmet avoids problems of leaking with higher airway pressures that are  
91 seen with the face mask. Accordingly, it can be used to deliver airway pressures up to 40  
92 cm H<sub>2</sub>O without leaking. Such higher pressures are more often needed to provide effective  
93 mechanical ventilation to patients with hypoxemic respiratory failure and/or shock; 4) it  
94 can be applied to any patient regardless of facial contour.<sup>xii</sup>

95  
96 The helmet interface has been compared to face mask in small case control studies for the  
97 treatment of hypoxemic respiratory failure (AHRF). While both interfaces have similar  
98 improvement of oxygenation, intubation rates, and mortality, the helmet had good  
99 tolerability that allowed for longer continuous application of noninvasive ventilation and in  
100 some cases sustained improvement of gas exchange even after discontinuation of therapy  
101 in immunocompromised patients,<sup>xiii,xiv</sup> non-cardiogenic acute hypoxemic respiratory  
102 failure,<sup>xv</sup> and acute cardiogenic pulmonary edema<sup>xvi</sup>. Given this initial experience and  
103 success with helmet ventilation, larger randomized studies comparing this intervention to  
104 endotracheal intubation in patients with AHRF and shock need to be done to understand  
105 the potential benefits of helmet ventilation.

### 106 107 **Purpose:**

108 The objective of our study is to evaluate the efficacy of helmet ventilation as compared with  
109 endotracheal intubation in patients with acute hypoxemic respiratory failure and evidence  
110 of shock, specifically assessing improvement of oxygenation, need for mechanical  
111 ventilation, and rates of ICU complications.

### 112 113 **Hypothesis:**

114 Noninvasive positive pressure ventilation delivered by helmet will improve oxygenation  
115 and avoid the need for endotracheal intubation in some patients with hypoxemic  
116 respiratory failure and shock. This may result in improved outcomes with decreased rates  
117 of ICU related complications.

### 118 119 **Methods:**

#### 120 *Study Design*

121 We propose a single center randomized controlled trial studying the efficacy of noninvasive  
122 ventilation delivered via helmet in patients with acute hypoxemic respiratory failure

123 (AHRF) and shock. All patients admitted to the adult medical intensive care unit at the  
124 University of Chicago will be screened for eligibility.

125

#### 126 *Subject Inclusion*

127 Patients aged  $\geq 18$  years of age who require endotracheal intubation and mechanical  
128 ventilation for non-cardiogenic acute hypoxemic respiratory failure (AHRF) and/or shock  
129 will be eligible for enrollment. Additional inclusion criteria include:

- 130 • Intact airway protective gag reflex
- 131 • Able to follow instructions (e.g. squeeze hand on command, eye contact with care  
132 provider, stick out tongue on command)

133 Acute hypoxemic respiratory failure will be defined as moderate to severe dyspnea,  
134 pulmonary infiltrates, and PaO<sub>2</sub>/FIO<sub>2</sub> ratio less than 300.

135 Shock will be defined as mean arterial pressure was less than 70 mm Hg or the systolic  
136 blood pressure was less than 100 mm Hg despite administration of intravenous fluids (at  
137 least 1000 ml of crystalloids or 500 ml of colloids, unless there was an elevation in the  
138 central venous pressure to  $>12$  mm Hg or in pulmonary-artery occlusion pressure to  $>14$   
139 mm Hg) and if there were signs of tissue hypoperfusion (e.g., altered mental state, mottled  
140 skin, urine output of  $<0.5$  ml per kilogram of body weight for 1 hour, or a serum lactate  
141 level of  $>2$  mmol per liter)<sup>xvii</sup>.

#### 142 *Subject exclusion*

143 The criteria for exclusion include:

- 144 • Cardiopulmonary arrest
- 145 • Glasgow coma scale  $<8$
- 146 • Absence of airway protective gag reflex
- 147 • Elevated intracranial pressure
- 148 • Tracheostomy
- 149 • Upper airway obstruction
- 150 • Pregnancy.
- 151 • Patients who refuse to undergo endotracheal intubation, whatever the initial  
152 therapeutic approach

153

#### 154 *Helmet group*

155 Patients randomized to the intervention group will receive noninvasive ventilation  
156 delivered via a latex-free helmet connected to the ventilator by conventional tubing. The  
157 helmet contains the head and the neck of the patient, has a rigid ring and is secured by two  
158 armpit braces; a soft collar adheres to the neck and ensures a sealed connection once the  
159 helmet is inflated. The rigid ring has an opening for the passage of nasogastric tube (if  
160 needed).

161

162 Patients randomized to helmet ventilation will either be connected immediately to this  
163 device de novo or extubated within the first 24 hours of their respiratory failure. In this  
164 latter case they will have mechanical ventilation via the endotracheal tube substituted

165 immediately with mechanical ventilation via the helmet. The ventilator delivers pressure  
166 through the helmet inlet tubing and exhaled breaths are released through the helmet outlet  
167 tubing. The positive end-expiratory pressure (PEEP) will be increased in increments of 2-3  
168 cmH<sub>2</sub>O to improve peripheral oxygen saturation of at least 90% at an inspired oxygen  
169 requirement (FiO<sub>2</sub>) of ≤ 60%. Pressure support will be increased in increments of 2-  
170 3cmH<sub>2</sub>O to obtain respiratory rate <25 breaths/min, disappearance of accessory muscle  
171 activity, and exhaled tidal volume of 6-8mL/kg of ideal body weight. After application of the  
172 helmet, arterial blood gas sampling will be utilized to follow gas-exchange; this is a part of  
173 usual care for the management of patients with acute hypoxemic respiratory failure and/or  
174 shock. Noninvasive support will be reduced progressively in accordance to clinical  
175 improvement and will be discontinued if patient maintains respiratory rate  
176 <30breaths/min and PaO<sub>2</sub> >75mm Hg with FiO<sub>2</sub> 0.5 without ventilatory support. If  
177 endotracheal intubation is required, the helmet will be removed and the patient will be  
178 intubated without delay.

179  
180 Predetermined criteria for intubation will include:

- 181 • Inability to achieve an arterial oxygen saturation by pulse oximetry or arterial blood  
182 gas ≥ 88%
- 183 • Respiratory rate > 36 breaths/min
- 184 • Loss of ability to maintain ventilation to keep arterial blood pH ≥ 7.20
- 185 • Loss of protective airway gag reflex (seizure disorder, severe encephalopathy,  
186 Glasgow Coma Scale <8)
- 187 • Respiratory or cardiac arrest
- 188 • Intolerance of the helmet
- 189 • Development of airway bleeding, persistent vomiting, and development of copious  
190 tracheal secretions.

191  
192 If an enrolled patient is randomized to helmet noninvasive ventilation after intubation,  
193 they will undergo interruption of sedation and extubation with immediate placement of the  
194 helmet and initiation on noninvasive ventilation. Early initiation of noninvasive ventilation  
195 in patients who do not meet start criteria for extubation to facilitate early extubation has  
196 been associated with decreased mortality, ventilator associated pneumonia, and ventilator  
197 days.<sup>xviii</sup>

198  
199 *Control Group*

200 Patients assigned to the conventional ventilation group will undergo intubation with cuffed  
201 endotracheal tubes. The initial ventilator setting will be assist-control mode with delivery  
202 of tidal volumes of 6-8mL/kg of ideal body weight, and titration of PEEP to achieve oxygen  
203 saturation of 90% at lowest possible FiO<sub>2</sub> (goal FiO<sub>2</sub> 0.6 or less). Daily interruption of  
204 sedation, awakening and breathing trials will be performed per primary team.

205  
206 **Data Collection:**

207 All study patients during hospitalization will have:

- 208  
209 1. General Data collection:

- 210 • Demographic information, including medical history number, age, race,
- 211 gender
- 212 • Details of current illness, including diagnosis, interventions, radiology
- 213 imaging, laboratory results. Severity of illness scoring will occur (APACHE II
- 214 – see Appendix 1) as well as daily serial organ function assessments (see
- 215 Appendix 2).
- 216 • Baseline medical/surgical/functional status history
- 217 • Dates of mechanical ventilation, ICU and hospital length of stay
- 218 • Discharge Location
- 219

## 220 2. Daily Data Collection

- 221 • Daily mental status evaluations, including the Richmond-Agitation-Sedation
- 222 Scale (Appendix 3) and the Confusion Assessment Method (Appendix 4)
- 223 • Muscular strength testing by physical therapists on ICU admission, ICU
- 224 discharge and hospital discharge
- 225

## 226 3. All patients after discharge

- 227 • Telephone interviews at 1, 3, 6, and 12 months after discharge (Appendix 7)
- 228 ○ Lasting approximately 5 minutes in duration
- 229 ○ Assessing self-reported performance of ADL's
- 230 ○ Reviewing need for medical care, including re-hospitalization,
- 231 rehabilitation, physician outpatient visits
- 232 ○ Current weight and nutritional status

### 233 **Endpoints:**

#### 234 *Primary*

- 235 • Improvement of oxygenation (defined as  $PaO_2/FiO_2 \geq 200$  or increase from
- 236 baseline by 100)
- 237 • Duration of mechanical ventilation via endotracheal tube
- 238 • Percentage of patients requiring endotracheal intubation
- 239 • ICU length of stay
- 240 • Hospital Mortality
- 241

#### 242 *Secondary*

- 243 • Duration of mechanical ventilation via either endotracheal tube or non-invasive
- 244 helmet
- 245 • ICU complications
- 246 ○ Ventilator associated pneumonia
- 247 ○ Barotrauma
- 248 ○ Gastrointestinal hemorrhage
- 249 ○ Pulmonary embolism
- 250 ○ Sacral Decubitus ulcer
- 251 ○ Delirium
- 252 ○ ICU acquired weakness
- 253 • Hospital length of stay
- 254 • Readmission to intensive care unite

- 255 • Discharge location (home, skilled nursing facility, nursing home, rehabilitation  
256

257 **Risks and Benefits**

258 The risks of this study are limited beyond those experienced during routine critical care of  
259 an intubated, mechanically ventilated patient.

- 260 • Non-invasive mechanical ventilation may be associated with failure to stabilize  
261 respiratory gas exchange. In this case, patients will be intubated and mechanically  
262 ventilated via the endotracheal tube.
- 263 • Non-invasive mechanical ventilation may be associated with failure to stabilize  
264 circulatory shock. In this case, patients will be intubated and mechanically  
265 ventilated via the endotracheal tube.
- 266 • Non-invasive mechanical ventilation may be associated with aspiration.  
267 Accordingly, only patients with an intact airway protective gag reflex will be eligible  
268 for enrollment. Aspiration is also known to occur in patients who have an  
269 endotracheal tube. Care will be taken to monitor all patients in this study for this  
270 occurrence.

271  
272

273

274

275

276

277

278

279

280

281

282

283

284

285

286

287

288

289

290

291

292 Figure 1: Endotracheal Tube

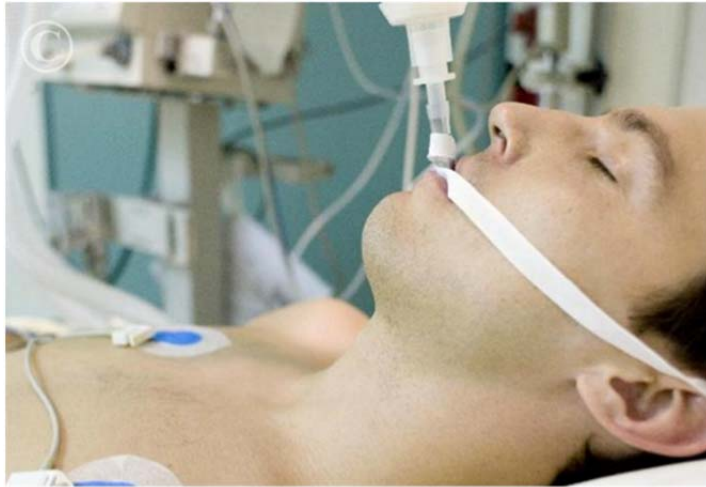

293

294

295 Figure 2: Facemask

296

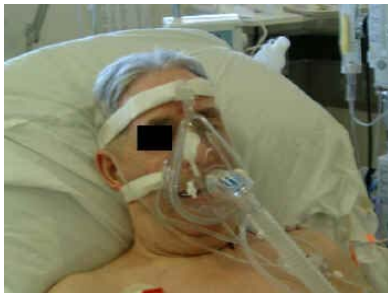

297

298

299

300 Figure 3: Helmet



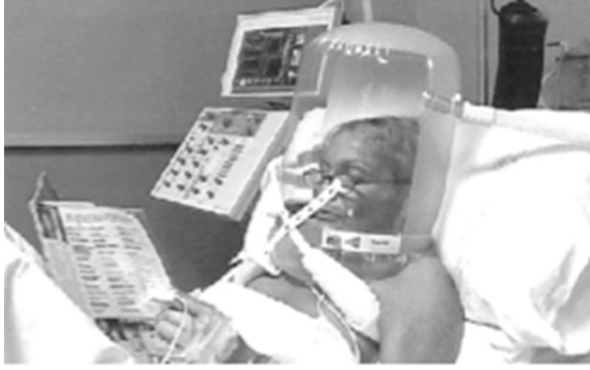

301

302

303  
304

## Appendix 1: ACUTE PHYSIOLOGY AND CHRONIC HEALTH EVALUATION (APACHE) II SCORING SYSTEM<sup>xix</sup>

|                                                                                                                                                                                                                                                                                                                                                                                                                                                                                                                                                                                                                                                                                                                                                                                                                                                                                                                                                                                                                  |                                                                                   | +4                                                   | +3                                                                                                                                   | +2       | +1                                                                                                                                                  | 0         | +1       | +2        | +3                                                                                                            | +4        | MINIMUM   | MAXIMUM | SCORE                                                                                                                             |                                                               |           |                                                      |           |                                                        |  |          |                                                                                   |  |            |                                    |  |            |                         |  |  |
|------------------------------------------------------------------------------------------------------------------------------------------------------------------------------------------------------------------------------------------------------------------------------------------------------------------------------------------------------------------------------------------------------------------------------------------------------------------------------------------------------------------------------------------------------------------------------------------------------------------------------------------------------------------------------------------------------------------------------------------------------------------------------------------------------------------------------------------------------------------------------------------------------------------------------------------------------------------------------------------------------------------|-----------------------------------------------------------------------------------|------------------------------------------------------|--------------------------------------------------------------------------------------------------------------------------------------|----------|-----------------------------------------------------------------------------------------------------------------------------------------------------|-----------|----------|-----------|---------------------------------------------------------------------------------------------------------------|-----------|-----------|---------|-----------------------------------------------------------------------------------------------------------------------------------|---------------------------------------------------------------|-----------|------------------------------------------------------|-----------|--------------------------------------------------------|--|----------|-----------------------------------------------------------------------------------|--|------------|------------------------------------|--|------------|-------------------------|--|--|
| <b>PHYSIOLOGY</b>                                                                                                                                                                                                                                                                                                                                                                                                                                                                                                                                                                                                                                                                                                                                                                                                                                                                                                                                                                                                | <b>VITAL SIGNS</b>                                                                | Temp °C                                              | ≥ 41                                                                                                                                 | 39-40.9  |                                                                                                                                                     | 38.5-38.9 | 36-38.4  | 34-35.9   | 32-33.9                                                                                                       | 30-31.9   | ≤ 29.9    |         |                                                                                                                                   |                                                               |           |                                                      |           |                                                        |  |          |                                                                                   |  |            |                                    |  |            |                         |  |  |
|                                                                                                                                                                                                                                                                                                                                                                                                                                                                                                                                                                                                                                                                                                                                                                                                                                                                                                                                                                                                                  |                                                                                   | BPs/d                                                |                                                                                                                                      |          |                                                                                                                                                     |           |          |           |                                                                                                               |           |           |         |                                                                                                                                   |                                                               |           |                                                      |           |                                                        |  |          |                                                                                   |  |            |                                    |  |            |                         |  |  |
|                                                                                                                                                                                                                                                                                                                                                                                                                                                                                                                                                                                                                                                                                                                                                                                                                                                                                                                                                                                                                  |                                                                                   | mean                                                 | ≥ 160                                                                                                                                | 130-159  | 110-129                                                                                                                                             |           | 70-109   |           | 50-69                                                                                                         |           | ≤ 49      |         |                                                                                                                                   |                                                               |           |                                                      |           |                                                        |  |          |                                                                                   |  |            |                                    |  |            |                         |  |  |
|                                                                                                                                                                                                                                                                                                                                                                                                                                                                                                                                                                                                                                                                                                                                                                                                                                                                                                                                                                                                                  |                                                                                   | HR(vent)                                             | ≥ 180                                                                                                                                | 140-179  | 110-139                                                                                                                                             |           | 70-109   |           | 55-69                                                                                                         | 40-54     | ≤ 39      |         |                                                                                                                                   |                                                               |           |                                                      |           |                                                        |  |          |                                                                                   |  |            |                                    |  |            |                         |  |  |
|                                                                                                                                                                                                                                                                                                                                                                                                                                                                                                                                                                                                                                                                                                                                                                                                                                                                                                                                                                                                                  |                                                                                   | RR(otal)                                             | ≥ 50                                                                                                                                 | 35-49    |                                                                                                                                                     |           | 25-34    | 12-24     | 10-11                                                                                                         | 6-9       | ≤ 5       |         |                                                                                                                                   |                                                               |           |                                                      |           |                                                        |  |          |                                                                                   |  |            |                                    |  |            |                         |  |  |
|                                                                                                                                                                                                                                                                                                                                                                                                                                                                                                                                                                                                                                                                                                                                                                                                                                                                                                                                                                                                                  | <b>OXYGENATION</b>                                                                | *ABC FIO <sub>2</sub>                                | IF FIO <sub>2</sub> < 50 USE Pao <sub>2</sub> ONLY. IF FIO <sub>2</sub> ≥ 50 DO NOT USE Pao <sub>2</sub> CALCULATE AaDO <sub>2</sub> |          |                                                                                                                                                     |           |          |           |                                                                                                               |           |           |         |                                                                                                                                   |                                                               |           |                                                      |           |                                                        |  |          |                                                                                   |  |            |                                    |  |            |                         |  |  |
|                                                                                                                                                                                                                                                                                                                                                                                                                                                                                                                                                                                                                                                                                                                                                                                                                                                                                                                                                                                                                  |                                                                                   | Pao <sub>2</sub>                                     |                                                                                                                                      |          |                                                                                                                                                     |           | > 70     | 61-70     |                                                                                                               | 55-60     | < 55      |         |                                                                                                                                   |                                                               |           |                                                      |           |                                                        |  |          |                                                                                   |  |            |                                    |  |            |                         |  |  |
|                                                                                                                                                                                                                                                                                                                                                                                                                                                                                                                                                                                                                                                                                                                                                                                                                                                                                                                                                                                                                  |                                                                                   | PaCO <sub>2</sub>                                    |                                                                                                                                      |          |                                                                                                                                                     |           |          |           |                                                                                                               |           |           |         |                                                                                                                                   |                                                               |           |                                                      |           |                                                        |  |          |                                                                                   |  |            |                                    |  |            |                         |  |  |
|                                                                                                                                                                                                                                                                                                                                                                                                                                                                                                                                                                                                                                                                                                                                                                                                                                                                                                                                                                                                                  |                                                                                   | pH                                                   | ≥ 7.7                                                                                                                                | 7.6-7.69 |                                                                                                                                                     |           | 7.5-7.59 | 7.33-7.49 |                                                                                                               | 7.25-7.32 | 7.15-7.24 | < 7.15  |                                                                                                                                   |                                                               |           |                                                      |           |                                                        |  |          |                                                                                   |  |            |                                    |  |            |                         |  |  |
|                                                                                                                                                                                                                                                                                                                                                                                                                                                                                                                                                                                                                                                                                                                                                                                                                                                                                                                                                                                                                  |                                                                                   | AaDO <sub>2</sub>                                    | ≥ 500                                                                                                                                | 350-499  | 200-349                                                                                                                                             |           | < 200    |           |                                                                                                               |           |           |         |                                                                                                                                   |                                                               |           |                                                      |           |                                                        |  |          |                                                                                   |  |            |                                    |  |            |                         |  |  |
| <b>LABS</b>                                                                                                                                                                                                                                                                                                                                                                                                                                                                                                                                                                                                                                                                                                                                                                                                                                                                                                                                                                                                      | serum CO <sub>2</sub>                                                             | ≥ 52                                                 | 41-51.9                                                                                                                              |          |                                                                                                                                                     | 32-40.9   | 22-31.9  |           | 18-21.9                                                                                                       | 15-17.9   | < 15      |         |                                                                                                                                   |                                                               |           |                                                      |           |                                                        |  |          |                                                                                   |  |            |                                    |  |            |                         |  |  |
|                                                                                                                                                                                                                                                                                                                                                                                                                                                                                                                                                                                                                                                                                                                                                                                                                                                                                                                                                                                                                  | Na+                                                                               | ≥ 180                                                | 160-179                                                                                                                              | 155-159  | 150-154                                                                                                                                             | 130-149   |          | 120-129   | 111-119                                                                                                       | ≤ 110     |           |         |                                                                                                                                   |                                                               |           |                                                      |           |                                                        |  |          |                                                                                   |  |            |                                    |  |            |                         |  |  |
|                                                                                                                                                                                                                                                                                                                                                                                                                                                                                                                                                                                                                                                                                                                                                                                                                                                                                                                                                                                                                  | K+                                                                                | ≥ 7                                                  | 6-6.9                                                                                                                                |          | 5.5-5.9                                                                                                                                             | 3.5-5.4   | 3-3.4    | 2.5-2.9   |                                                                                                               | < 2.5     |           |         |                                                                                                                                   |                                                               |           |                                                      |           |                                                        |  |          |                                                                                   |  |            |                                    |  |            |                         |  |  |
|                                                                                                                                                                                                                                                                                                                                                                                                                                                                                                                                                                                                                                                                                                                                                                                                                                                                                                                                                                                                                  | **Creat                                                                           | ≥ 3.5                                                | 2-3.4                                                                                                                                | 1.5-1.9  |                                                                                                                                                     | 0.6-1.4   |          | < 0.8     |                                                                                                               |           |           |         |                                                                                                                                   |                                                               |           |                                                      |           |                                                        |  |          |                                                                                   |  |            |                                    |  |            |                         |  |  |
|                                                                                                                                                                                                                                                                                                                                                                                                                                                                                                                                                                                                                                                                                                                                                                                                                                                                                                                                                                                                                  | Hct                                                                               | ≥ 60                                                 | 50-59.9                                                                                                                              | 46-49.9  | 30-45.9                                                                                                                                             |           | 20-29.9  |           | < 20                                                                                                          |           |           |         |                                                                                                                                   |                                                               |           |                                                      |           |                                                        |  |          |                                                                                   |  |            |                                    |  |            |                         |  |  |
| WBC                                                                                                                                                                                                                                                                                                                                                                                                                                                                                                                                                                                                                                                                                                                                                                                                                                                                                                                                                                                                              | ≥ 40                                                                              |                                                      | 20-39.9                                                                                                                              | 15-19.9  | 3-14.9                                                                                                                                              |           | 1-2.9    |           | < 1                                                                                                           |           |           |         |                                                                                                                                   |                                                               |           |                                                      |           |                                                        |  |          |                                                                                   |  |            |                                    |  |            |                         |  |  |
| <b>GLASGOW COMA</b>                                                                                                                                                                                                                                                                                                                                                                                                                                                                                                                                                                                                                                                                                                                                                                                                                                                                                                                                                                                              | <b>NEURO</b>                                                                      | APACHE                                               | 0                                                                                                                                    | +1       | +2                                                                                                                                                  | +3        | +4       | +5        | +6                                                                                                            | +7        | +8        | +9      | +10                                                                                                                               | +11                                                           | +12       | SCORE                                                |           |                                                        |  |          |                                                                                   |  |            |                                    |  |            |                         |  |  |
|                                                                                                                                                                                                                                                                                                                                                                                                                                                                                                                                                                                                                                                                                                                                                                                                                                                                                                                                                                                                                  |                                                                                   | GC SCORE                                             | 15                                                                                                                                   | 14       | 13                                                                                                                                                  | 12        | 11       | 10        | 9                                                                                                             | 8         | 7         | 6       | 5                                                                                                                                 | 4                                                             | 3         |                                                      |           |                                                        |  |          |                                                                                   |  |            |                                    |  |            |                         |  |  |
|                                                                                                                                                                                                                                                                                                                                                                                                                                                                                                                                                                                                                                                                                                                                                                                                                                                                                                                                                                                                                  |                                                                                   | (Circle appropriate score for each category)         | <b>EYE</b><br>4 SPONTANEOUS<br>3 VERBAL COMMAND<br>2 PAINFUL STIMULI<br>1 NO RESPONSE                                                |          | <b>VERBAL NON-INTUBATED</b><br>5 ORIENTED AND TALKS<br>4 DISORIENTED & TALKS<br>3 INAPPROPRIATE WORDS<br>2 INCOMPREHENSIBLE SOUNDS<br>1 NO RESPONSE |           |          |           | <b>VERBAL INTUBATED</b><br>5 SEEMS ABLE TO TALK<br>3 QUESTIONABLE ABILITY TO TALK<br>1 GENERALLY UNRESPONSIVE |           |           |         | <b>MOTOR</b><br>6 VERBAL COMMAND<br>5 LOCALIZES TO PAIN<br>4 WITHDRAWS TO PAIN<br>3 DECORTICATE<br>2 DECEREBRATE<br>1 NO RESPONSE |                                                               |           |                                                      |           |                                                        |  |          |                                                                                   |  |            |                                    |  |            |                         |  |  |
| <b>AGE &amp; HEALTH</b>                                                                                                                                                                                                                                                                                                                                                                                                                                                                                                                                                                                                                                                                                                                                                                                                                                                                                                                                                                                          | <b>AGE</b>                                                                        | Age Score                                            | 0                                                                                                                                    | +2       | +3                                                                                                                                                  | +5        | +6       |           |                                                                                                               |           |           |         |                                                                                                                                   | SCORE                                                         |           |                                                      |           |                                                        |  |          |                                                                                   |  |            |                                    |  |            |                         |  |  |
|                                                                                                                                                                                                                                                                                                                                                                                                                                                                                                                                                                                                                                                                                                                                                                                                                                                                                                                                                                                                                  |                                                                                   | Age Score                                            | ≤ 44                                                                                                                                 | 45-54    | 55-64                                                                                                                                               | 65-74     | ≥ 75     |           |                                                                                                               |           |           |         |                                                                                                                                   | SCORE                                                         |           |                                                      |           |                                                        |  |          |                                                                                   |  |            |                                    |  |            |                         |  |  |
|                                                                                                                                                                                                                                                                                                                                                                                                                                                                                                                                                                                                                                                                                                                                                                                                                                                                                                                                                                                                                  | <b>CHRONIC HEALTH</b>                                                             | CH Score                                             |                                                                                                                                      |          |                                                                                                                                                     |           |          |           |                                                                                                               |           |           |         |                                                                                                                                   |                                                               | SCORE     |                                                      |           |                                                        |  |          |                                                                                   |  |            |                                    |  |            |                         |  |  |
|                                                                                                                                                                                                                                                                                                                                                                                                                                                                                                                                                                                                                                                                                                                                                                                                                                                                                                                                                                                                                  |                                                                                   | CH Scale                                             | +5<br>NON-OP or EMERGENCY-OP                                                                                                         |          |                                                                                                                                                     |           |          |           | +2<br>ELECTIVE POST-OP                                                                                        |           |           |         |                                                                                                                                   |                                                               |           |                                                      |           |                                                        |  |          |                                                                                   |  |            |                                    |  |            |                         |  |  |
| <b>WITH ANY 1 OF THE FOLLOWING CHRONIC CONDITIONS PRIOR TO THIS ILLNESS:</b>                                                                                                                                                                                                                                                                                                                                                                                                                                                                                                                                                                                                                                                                                                                                                                                                                                                                                                                                     |                                                                                   |                                                      |                                                                                                                                      |          |                                                                                                                                                     |           |          |           |                                                                                                               |           |           |         |                                                                                                                                   |                                                               |           |                                                      |           |                                                        |  |          |                                                                                   |  |            |                                    |  |            |                         |  |  |
| <table style="width: 100%; border: none;"> <tr> <td style="width: 30%; border: none;">IF APPLIES, CIRCLE THE NUMBER CORRESPONDING TO THE CONDITION.</td> <td style="width: 10%; border: none;">1 LIVER =</td> <td style="width: 60%; border: none;">CIRRHOSIS WITH PORTAL HYPERTENSION or ENCEPHALOPATHY</td> </tr> <tr> <td style="border: none;">2 CVASC =</td> <td style="border: none;">CLASS IV ANGINA or AT REST or MIN SELF-CARE ACTIVITIES</td> <td style="border: none;"></td> </tr> <tr> <td style="border: none;">3 PULM =</td> <td style="border: none;">CHRONIC HYPOX or HYPERCAP or POLYCYTHEMIA or PHT &gt;40 MMHG or RESPIRATOR DEPENDENT</td> <td style="border: none;"></td> </tr> <tr> <td style="border: none;">4 KIDNEY =</td> <td style="border: none;">CHRONIC PERITONEAL or HEMODIALYSIS</td> <td style="border: none;"></td> </tr> <tr> <td style="border: none;">5 IMMUNE =</td> <td style="border: none;">IMMUNO COMPROMISED HOST</td> <td style="border: none;"></td> </tr> </table> |                                                                                   |                                                      |                                                                                                                                      |          |                                                                                                                                                     |           |          |           |                                                                                                               |           |           |         |                                                                                                                                   | IF APPLIES, CIRCLE THE NUMBER CORRESPONDING TO THE CONDITION. | 1 LIVER = | CIRRHOSIS WITH PORTAL HYPERTENSION or ENCEPHALOPATHY | 2 CVASC = | CLASS IV ANGINA or AT REST or MIN SELF-CARE ACTIVITIES |  | 3 PULM = | CHRONIC HYPOX or HYPERCAP or POLYCYTHEMIA or PHT >40 MMHG or RESPIRATOR DEPENDENT |  | 4 KIDNEY = | CHRONIC PERITONEAL or HEMODIALYSIS |  | 5 IMMUNE = | IMMUNO COMPROMISED HOST |  |  |
| IF APPLIES, CIRCLE THE NUMBER CORRESPONDING TO THE CONDITION.                                                                                                                                                                                                                                                                                                                                                                                                                                                                                                                                                                                                                                                                                                                                                                                                                                                                                                                                                    | 1 LIVER =                                                                         | CIRRHOSIS WITH PORTAL HYPERTENSION or ENCEPHALOPATHY |                                                                                                                                      |          |                                                                                                                                                     |           |          |           |                                                                                                               |           |           |         |                                                                                                                                   |                                                               |           |                                                      |           |                                                        |  |          |                                                                                   |  |            |                                    |  |            |                         |  |  |
| 2 CVASC =                                                                                                                                                                                                                                                                                                                                                                                                                                                                                                                                                                                                                                                                                                                                                                                                                                                                                                                                                                                                        | CLASS IV ANGINA or AT REST or MIN SELF-CARE ACTIVITIES                            |                                                      |                                                                                                                                      |          |                                                                                                                                                     |           |          |           |                                                                                                               |           |           |         |                                                                                                                                   |                                                               |           |                                                      |           |                                                        |  |          |                                                                                   |  |            |                                    |  |            |                         |  |  |
| 3 PULM =                                                                                                                                                                                                                                                                                                                                                                                                                                                                                                                                                                                                                                                                                                                                                                                                                                                                                                                                                                                                         | CHRONIC HYPOX or HYPERCAP or POLYCYTHEMIA or PHT >40 MMHG or RESPIRATOR DEPENDENT |                                                      |                                                                                                                                      |          |                                                                                                                                                     |           |          |           |                                                                                                               |           |           |         |                                                                                                                                   |                                                               |           |                                                      |           |                                                        |  |          |                                                                                   |  |            |                                    |  |            |                         |  |  |
| 4 KIDNEY =                                                                                                                                                                                                                                                                                                                                                                                                                                                                                                                                                                                                                                                                                                                                                                                                                                                                                                                                                                                                       | CHRONIC PERITONEAL or HEMODIALYSIS                                                |                                                      |                                                                                                                                      |          |                                                                                                                                                     |           |          |           |                                                                                                               |           |           |         |                                                                                                                                   |                                                               |           |                                                      |           |                                                        |  |          |                                                                                   |  |            |                                    |  |            |                         |  |  |
| 5 IMMUNE =                                                                                                                                                                                                                                                                                                                                                                                                                                                                                                                                                                                                                                                                                                                                                                                                                                                                                                                                                                                                       | IMMUNO COMPROMISED HOST                                                           |                                                      |                                                                                                                                      |          |                                                                                                                                                     |           |          |           |                                                                                                               |           |           |         |                                                                                                                                   |                                                               |           |                                                      |           |                                                        |  |          |                                                                                   |  |            |                                    |  |            |                         |  |  |

\*IF NO ABG USE SERUM CO<sub>2</sub>

\*\*IF IN ARF DOUBLE THE CREATININE POINT SCORE

|                  |                             |  |
|------------------|-----------------------------|--|
| <b>APACHE II</b> | Physiology Points           |  |
|                  | Glasgow points              |  |
|                  | Chronic Health Points       |  |
|                  | Age Points                  |  |
|                  | <b>APACHE SCORE (TOTAL)</b> |  |

305  
306  
307  
308

309 **Appendix 2: Serial Organ Function Assessment[18]<sup>xx</sup>**

310

| SOFA score                                                                              | 1            | 2                                        | 3                                       | 4              |
|-----------------------------------------------------------------------------------------|--------------|------------------------------------------|-----------------------------------------|----------------|
|                                                                                         |              |                                          | Respiration with respiratory support    |                |
| Respiration with respiratory support<br>PaO <sub>2</sub> /FiO <sub>2</sub> , mmHg       | < 400        | < 300                                    | < 200                                   | < 100          |
| Coagulation<br>Platelets x10 <sup>3</sup> /mm <sup>3</sup>                              | < 150        | < 100                                    | < 50                                    | < 20           |
| Liver<br>Bilirubin, mg/dl                                                               | 1.2-1.9      | 2-5.9                                    | 6-11.9                                  | > 12           |
| Cardiovascular<br>Hypotension<br>>15 or<br>(doses in ug/kg-min)<br>catecholamines > 0,1 | MAP < 70mmHg | Dopamine ≤ 5 or<br>Dobutamine (any dose) | Dopamine > 5 or<br>catecholamines ≤ 0.1 | Dopamine       |
| Neurologic<br>Glasgow Coma Score                                                        | 13-14        | 10-12                                    | 6-9                                     | < 6            |
| Renal<br>Creatinine mg/dl or<br>Urine output ml/zi                                      | 1.2-1.9      | 2-3.4                                    | 3.5-4.9<br>(200-500)                    | > 5<br>(< 200) |

311

312

313

314

315

316

317

318

319

320

321

TABLE 1. RICHMOND AGITATION–SEDATION SCALE

| Score | Term              | Description                                                                                     |
|-------|-------------------|-------------------------------------------------------------------------------------------------|
| +4    | Combative         | Overtly combative or violent; immediate danger to staff                                         |
| +3    | Very agitation    | Pulls on or removes tube(s) or catheter(s) or has aggressive behavior toward staff              |
| +2    | Agitated          | Frequent nonpurposeful movement or patient–ventilator dyssynchrony                              |
| +1    | Restless          | Anxious or apprehensive but movements not aggressive or vigorous                                |
| 0     | Alert and calm    |                                                                                                 |
| –1    | Drowsy            | Not fully alert, but has sustained (more than 10 seconds) awakening, with eye contact, to voice |
| –2    | Light sedation    | Briefly (less than 10 seconds) awakens with eye contact to voice                                |
| –3    | Moderate sedation | Any movement (but no eye contact) to voice                                                      |
| –4    | Deep sedation     | No response to voice, but any movement to physical stimulation                                  |
| –5    | Unarousable       | No response to voice or physical stimulation                                                    |

## Procedure

1. Observe patient. Is patient alert and calm (score 0)?  
Does patient have behavior that is consistent with restlessness or agitation (score +1 to +4 using the criteria listed above, under DESCRIPTION)?
2. If patient is not alert, in a loud speaking voice state patient's name and direct patient to open eyes and look at speaker. Repeat once if necessary. Can prompt patient to continue looking at speaker.  
Patient has eye opening and eye contact, which is sustained for more than 10 seconds (score –1).  
Patient has eye opening and eye contact, but this is not sustained for 10 seconds (score –2).  
Patient has any movement in response to voice, excluding eye contact (score –3).
3. If patient does not respond to voice, physically stimulate patient by shaking shoulder and then rubbing sternum if there is no response to shaking shoulder.  
Patient has any movement to physical stimulation (score –4).  
Patient has no response to voice or physical stimulation (score –5).

| Features and Descriptions                                                                                                                                                                                                                                                                                                                                                                                                                                                                                                                                                                                                                                                                                                                                                                                                                                                                                                                                                                              | Absent | Present |
|--------------------------------------------------------------------------------------------------------------------------------------------------------------------------------------------------------------------------------------------------------------------------------------------------------------------------------------------------------------------------------------------------------------------------------------------------------------------------------------------------------------------------------------------------------------------------------------------------------------------------------------------------------------------------------------------------------------------------------------------------------------------------------------------------------------------------------------------------------------------------------------------------------------------------------------------------------------------------------------------------------|--------|---------|
| <b>I. Acute onset or fluctuating course*</b>                                                                                                                                                                                                                                                                                                                                                                                                                                                                                                                                                                                                                                                                                                                                                                                                                                                                                                                                                           |        |         |
| A. Is there evidence of an acute change in mental status from the baseline?<br>B. Or, did the (abnormal) behavior fluctuate during the past 24 hours, that is, tend to come and go or increase and decrease in severity as evidenced by fluctuations on the Richmond Agitation Sedation Scale (RASS) or the Glasgow Coma Scale?                                                                                                                                                                                                                                                                                                                                                                                                                                                                                                                                                                                                                                                                        |        |         |
| <b>II. Inattention†</b>                                                                                                                                                                                                                                                                                                                                                                                                                                                                                                                                                                                                                                                                                                                                                                                                                                                                                                                                                                                |        |         |
| Did the patient have difficulty focusing attention as evidenced by a score of less than 8 correct answers on either the visual or auditory components of the Attention Screening Examination (ASE)?                                                                                                                                                                                                                                                                                                                                                                                                                                                                                                                                                                                                                                                                                                                                                                                                    |        |         |
| <b>III. Disorganized thinking</b>                                                                                                                                                                                                                                                                                                                                                                                                                                                                                                                                                                                                                                                                                                                                                                                                                                                                                                                                                                      |        |         |
| Is there evidence of disorganized or incoherent thinking as evidenced by incorrect answers to 3 or more of the 4 questions and inability to follow the commands?<br>Questions<br>1. Will a stone float on water?<br>2. Are there fish in the sea?<br>3. Does 1 pound weigh more than 2 pounds?<br>4. Can you use a hammer to pound a nail?<br>Commands<br>1. Are you having unclear thinking?<br>2. Hold up this many fingers. (Examiner holds 2 fingers in front of the patient.)<br>3. Now do the same thing with the other hand (without holding the 2 fingers in front of the patient).<br>(If the patient is already extubated from the ventilator, determine whether the patient's thinking is disorganized or incoherent, such as rambling or irrelevant conversation, unclear or illogical flow of ideas, or unpredictable switching from subject to subject.)                                                                                                                                 |        |         |
| <b>IV. Altered level of consciousness</b>                                                                                                                                                                                                                                                                                                                                                                                                                                                                                                                                                                                                                                                                                                                                                                                                                                                                                                                                                              |        |         |
| Is the patient's level of consciousness anything other than alert, such as being vigilant or lethargic or in a stupor, or coma?<br>Alert: spontaneously fully aware of environment and interacts appropriately<br>Vigilant: hyperalert<br>Lethargic: drowsy but easily aroused, unaware of some elements in the environment or not spontaneously interacting with the interviewer; becomes fully aware and appropriately interactive when prodded minimally<br>Stupor: difficult to arouse, unaware of some or all elements in the environment or not spontaneously interacting with the interviewer; becomes incompletely aware when prodded strongly; can be aroused only by vigorous and repeated stimuli and as soon as the stimulus ceases, stuporous subject lapses back into unresponsive state<br>Coma: unarousable, unaware of all elements in the environment with no spontaneous interaction or awareness of the interviewer so that the interview is impossible even with maximal prodding |        |         |
| <b>Overall CAM-ICU Assessment (Features 1 and 2 and either Feature 3 or 4): Yes___ No___</b>                                                                                                                                                                                                                                                                                                                                                                                                                                                                                                                                                                                                                                                                                                                                                                                                                                                                                                           |        |         |

\*The scores included in the 10-point RASS range from a high of 4 (combative) to a low of -5 (deeply comatose and unresponsive). Under the RASS system, patients who were spontaneously alert, calm, and not agitated were scored at 0 (neutral zone). Anxious or agitated patients received a range of scores depending on their level of anxiety: 1 for anxious, 2 for agitated (fighting ventilator), 3 for very agitated (pulling on or removing catheters), or 4 for combative (violent and a danger to staff). The scores -1 to -5 were assigned for patients with varying degrees of sedation based on their ability to maintain eye contact: -1 for more than 10 seconds, -2 for less than 10 seconds, and -3 for eye opening but no eye contact. If physical stimulation was required, then the patients were scored as either -4 for eye opening or movement with physical or painful stimulation or -5 for no response to physical or painful stimulation. The RASS has excellent interrater reliability and intraclass correlation coefficients of 0.95 and 0.97, respectively, and has been validated against visual analog scale and geropsychiatric diagnoses in 2 ICU studies.<sup>37,38</sup>

†In completing the visual ASE, the patients were shown 5 simple pictures (previously published<sup>39</sup>) at 3-second intervals and asked to remember them. They were then immediately shown 10 subsequent pictures and asked to nod "yes" or "no" to indicate whether they had or had not just seen each of the pictures. Since 5 pictures had been shown to them already, for which the correct response was to nod "yes," and 5 others were new, for which the correct response was to shake their heads "no," patients scored perfectly if they achieved 10 correct responses. Scoring accounted for either errors of omission (indicating "no" for a previously shown picture) or for errors of commission (indicating "yes" for a picture not previously shown). In completing the auditory ASE, patients were asked to squeeze the rater's hand whenever they heard the letter A during the recitation of a series of 10 letters. The rater then read 10 letters from the following list in a normal tone at a rate of 1 letter per second: S, A, H, E, V, A, A, R, A, T. A scoring method similar to that of the visual ASE was used for the auditory ASE testing.

This table may be reproduced without permission for clinical use only (Ely EW et al. JAMA. 2001;286:2707-2710).

326 **Appendix 5: Telephone Survey**

327 We would like to ask you (the PATIENT) some questions about your (the PATIENT'S)  
328 health:

329 • In general, how would you say your health is now?

330  Excellent

331  Very good

332  Good

333  Fair

334  Poor

335

336 • Sometimes it is necessary to spend most of the day in bed. Is this true for you now?

337  Yes

338  No

339  Don't know

340

341 • Have you fallen since discharge/since the last time our team talked with you by  
342 phone?

343  Yes

344  No

345  Don't know

346

347 • If you have fallen since discharge/since the last time our team talked with you by  
348 phone, did you see a doctor or go to an emergency department to get checked out  
349 after the fall?

350  Yes

351  No

352  Don't know

353

354 • Have you been admitted to a hospital since your hospital discharge/the last time our  
355 team spoke with you by phone?

356  Yes

357  No

358  Don't know

359

360 • Since discharge or the last time our team spoke with you, have you spent any time  
361 living in a nursing home, group home/assisted living facility, or rehabilitation  
362 facility?

363  Yes

364  No

365  Don't know

366

367 • Did (you/PATIENT) need help washing or bathing (yourself/HIMSELF/HERSELF)?

368  Yes

369  No

370  Don't know

371

372 • Do you need help dressing and undressing?

373  Yes

374  No

375  Don't know

376

377 • Do you need help eating, including cutting food?

378  Yes

379  No

380  Don't know

381

382 • Do you need help getting in and out of the bed and a chair?

383  Yes

384  No

385  Don't know

386

387 • Do you need help cleaning yourself for either bowel or bladder functions?

388  Yes

389  No

390  Don't know

391

392 • Do you sometimes have an accident with your bowels either during the day or  
393 night?

394  Yes

395  No

396  Don't know

397

398 • Do you sometimes wet yourself either during the day or night?

399  Yes

400  No

401  Don't know

402

403

404 **Do you do the following on your own (NO HELP), with some help, or are you unable**  
405 **to:**

406 • Use the telephone, including looking up and dialing numbers, and answering the  
407 phone?

408  On own/no help

409  Some help

410  Unable to do this

411  Don't know

412

413 • Get to places out of walking distance by using public transportation or driving  
414 your car?

415  On own/no help

416  Some help

417  Unable to do this

418  Don't know

419

420 • Shop for groceries or clothes?

421  On own/no help

422  Some help

423  Unable to do this

424  Don't know

425

426 • Prepare, serve and provide meals for yourself?

427  On own/no help

428  Some help

429  Unable to do this

430  Don't know

431

432 • Do light housework, such as dusting or doing dishes?

433  On own/no help

434  Some help

435  Unable to do this

436  Don't know

437

438 • Take pills or medicines in the correct amounts and at the correct times?

439  On own/no help

440  Some help

441  Unable to do this

442  Don't know

443



- 444 • Handle your own money, including writing checks and paying bills?  
445  On own/no help  
446  Some help  
447  Unable to do this  
448  Don't know  
449

- 450 • Do your laundry?  
451  On own/no help  
452  Some help  
453  Unable to do this  
454  Don't know  
455

- 456 • Walk across the room either on your own or with a cane or walker?  
457  On own/no help  
458  Some help  
459  Unable to do this  
460  Don't know  
461

462 The following questions are about your living situation.

- 463 • Where do you currently live?  
464  Your (the PATIENT'S) own apartment or house  
465  A relative or friend's apartment or house  
466  A nursing home, group home/assisted living facility, or long-term care facility  
467  A homeless shelter  
468  Other \_\_\_\_\_  
469

- 470 • How many people live with you (the PATIENT)? \_\_\_\_\_  
471

- 472 • What is your current weight? \_\_\_\_\_  
473  
474

- 475 • If you (the PATIENT) need extra help when you get home from the hospital, is  
476 there someone who can help you (the PATIENT)?

- 477  No  
478  Yes  
479

480

481

482

483 If "Yes", what is this person's relationship to you (the PATIENT)?

484

485 Spouse 1 Neighbor or landlord 7

486 Other partner 2 Other friend 8

487 Child 3 Floor nurse 9

488 Parent 4 Visiting nurse 10

489 Brother or sister 5 Home attendant or health aide 11

490 Other relative 6 Some other person 12

491 (specify) (specify)

492

493 • What does this person do during the day if he/she is not helping you (the  
494 PATIENT)?

495  Work outside the home without pay

496  Work outside the home for pay

497  Work in the home without pay

498  Work in the home for pay

499  Other (specify) \_\_\_\_\_

500

501 • How old is this person?

502  Under 18  75-84

503  18-49  85-89

504  50-64  90 or greater

505  65-74

506

1. Burns HP, Dayal VS, Scott A, Van Nostran ANP, Bryce DP: Laryngotracheal trauma: observations on its pathogenesis and its prevention following prolonged orotracheal intubation in the adult. *Laryngoscope* 1979; 89:1316-1325.
2. ii Cook DJ, Walter SD, Cook RJ, Griffith LE, Guyatt GH, Leasa D, et al. Incidence of and risk factors for ventilator-associated pneumonia in critically ill patients. *Ann Intern Med* 1998;129:433-40.
- iii Tremblay LN, Slutsky AS: Ventilator-induced lung injury: From the bench to the bedside. *Intensive Care Med* 2006; 32:24 -33
- iv DeJonghe B, Cook D, Sharshar T, Le- faucheur J, Carlet J, Outin H. Acquired neuromuscular disorders in critically ill patients: a systematic review. *Intensive Care Med* 1998;24:1242-1250.
- v Brochard L, Mancebo J, Wysocki M, Lofaso F, Conti G, Rauss A, Simonneau G, Benito S, Gasparetto A, Lemaire F, et al.: NIV for acute exacerbations of chronic obstructive pulmonary disease. *N Engl J Med* 1995;333:817-822.
- vi Keenan SP, Sinuff T, Cook DJ, Hill NS: Which patients with acute exacerbation of chronic obstructive pulmonary disease benefit from non-invasive positive-pressure ventilation? A systematic review of the literature. *Ann Intern Med* 2003, 138: 864-870.
- vii Bersten AD, Holt AW, Vedic AE, Skowronski GA, Baggoley CJ: Treatment of severe cardiogenic pulmonary edema with continuous positive airway pressure delivered by face mask. *N Engl J Med* 1991, 325:1825-1830.
- viii Nava S, Carbone G, DiBattista N, Bellone A, Baiardi P, Casentini R, Marengo M, Giostra F, Borasi G, Groff P: Noninvasive ventilation in cardiogenic pulmonary edema. A multicenter randomized trial. *Am J Respir Crit Care Med* 2003, 168:1432-1437.
- ix Antonelli M, Conti G, Bui M, et al. Noninvasive ventilation for treatment of acute respiratory failure in patients undergoing solid organ transplantation. *JAMA* 2000; 283: 235- 241.
- x Hilbert G, Gruson D, Vargas F, Valentino R. Noninvasive ventilation in immunosuppressed patients with pulmonary infiltrates, fever and acute respiratory failure. *New Eng J Med* 2001; 344: 481-487.
- xi Chiumello D. Is the helmet different than the face mask in delivering noninvasive ventilation? *Chest* 2006;129;1402-1403.
- xii Antonelli M, Pennisi MA, Conti G. New advances in the use of noninvasive ventilation for acute hypoxaemic respiratory failure. *Eur Respir J* 2003; 22: Suppl. 42, 65s-71s.
- xiii Rocco M, Dell'Utri D, Morelli A, Spadetta G, Conti G, Antonelli M, Pietropaoli P. Noninvasive Ventilation by Helmet or face mask in Immocompromised patients: a case-control study. *Chest* 2004;126:1508-1515.
- xiv Principi T, Pantanetti S, Catani F, Elisei D, Gabbanelli V, Pelaia P, Leoni P. Noninvasive continuous positive airway pressure delivered by helmet in hematological malignancy patients with hypoxemic acute respiratory failure. *Intensive Care Med* 2004;30:147-150.
- xv Antonelli M, Conti G, Pelosi P, et al. New treatment of acute hypoxemic respiratory failure: Non invasive pressure support ventilation delivered by helmet-A pilot controlled trial. *Crit Care Med* 2002; 30: 602-608.

---

<sup>xvi</sup> Tonnelier, J, Prat G, Nowak E, Goetghebeur D, Renault A, Boles K, L'her E. Noninvasive continuous positive airway pressure ventilation using a new helmet interface: a case-control prospective pilot study. *Intensive Care Med* 2003;29:2077-2080.

<sup>xvii</sup> De Backer D, Biston P, Devriendt J, Madl C, Chochrad D, Aldecoa C, et al. Comparison of Dopamine and Norepinephrine in the treatment of shock. *N Engl J Med* 2010;362:779-789.

<sup>xviii</sup> Burns KE, Adhikari NK, Meade MO. A meta-analysis of noninvasive weaning to facilitate liberation from mechanical ventilation. *Can J Anesth* 2006;53(3):305-315.

<sup>xix</sup> Knaus, W.A., et al., *APACHE II: a severity of disease classification system*. *Crit Care Med*, 1985. **13**(10): p. 818-29.

<sup>xx</sup> Vincent, J.L., et al., *The SOFA (Sepsis-related Organ Failure Assessment) score to describe organ dysfunction/failure. On behalf of the Working Group on Sepsis-Related Problems of the European Society of Intensive Care Medicine*. *Intensive Care Med*, 1996. **22**(7): p. 707-10.

<sup>xxi</sup> Sessler, C.N., et al., *The Richmond Agitation-Sedation Scale: validity and reliability in adult intensive care unit patients*. *Am J Respir Crit Care Med*, 2002. **166**(10): p. 1338-44.

<sup>xxii</sup> Ely, E.W., et al., *Delirium in mechanically ventilated patients: validity and reliability of the confusion assessment method for the intensive care unit (CAM-ICU)*. *Jama*, 2001. **286**(21): p. 2703-10.

---

## PROTOCOL AMENDMENT 1

**Title:** Noninvasive Ventilation in Patients with Shock and/or Hypoxemic Respiratory Failure: A Comparison of Face mask versus Helmet interface

**Date:** January 16, 2013

### **Principle Investigators:**

- Bhakti Patel, MD. Fellow, Section of Pulmonary and Critical Care Medicine
- Margaret Davis Hovda, MD Fellow, Section of Pulmonary and Critical Care Medicine
- Jared Greenberg, MD, Fellow, Section of Pulmonary and Critical Care Medicine
- Shruti B. Patel, MD Fellow, Section of Pulmonary and Critical Care Medicine
- John P. Kress, MD. Professor, Section of Pulmonary and Critical Care Medicine
- Anne Pohlman, APN-CNS, Coordinator Clinical Research
- Jesse B. Hall, MD. Professor, Section of Pulmonary and Critical Care Medicine

### **Background:**

Respiratory failure characterized by acute deterioration of gas exchange is often treated with endotracheal intubation and mechanical ventilation (figure 1). Similarly, the classic teaching in the treatment of patients with shock required intubation to “take away the work of breathing.” Although, the institution of mechanical ventilation is considered life saving, the associated complications of tracheal stenosis,<sup>xxii</sup> ventilator associated pneumonia,<sup>xxii</sup> barotrauma<sup>xxii</sup>, and neuromuscular weakness<sup>xxii</sup> are not without considerable morbidity and mortality.

Over the past years non-invasive ventilation delivered by facemask (figure 2) has become an attractive option to improve gas exchange without an artificial airway, thus preserving airway defense mechanisms, speech and swallow capabilities, and allowing interaction between patients and care providers while avoiding the complications of endotracheal intubation. This strategy of non-invasive ventilation has demonstrated significant mortality benefit in patients with hypercapnic respiratory failure from COPD,<sup>xxii,xxii</sup> acute cardiogenic pulmonary edema,<sup>xxii,xxii</sup> and hypoxemic respiratory failure in immunocompromised patients.<sup>xxii,xxii</sup> In addition to successfully avoiding endotracheal intubation, non-invasive ventilation has been used to successfully liberate patients from mechanical ventilation via an endotracheal tube to extubation and transition to non-invasive mechanical ventilation. As such non-invasive ventilation has been a standard therapy for certain types of respiratory failure for more than 15 years.

Despite the advantages of non-invasive ventilation, up to forty percent of patients fail facemask trials in part because of mask intolerance and severity of disease.<sup>xxii</sup> Some common complications contributing to mask intolerance include claustrophobia, nasal bridge skin necrosis, acneiform rash, and conjunctivitis and if present prompt premature

---

discontinuation of non-invasive ventilation and endotracheal intubation. Further limitation to facemask non-invasive ventilation is that the seal integrity is lost when higher pressures are required. For example, non-invasive ventilation via a nasal or full face mask typically begins to demonstrate leaks when the pressures required exceed 15-20 cm H<sub>2</sub>O. Unfortunately, certain types of respiratory failure such as that due to hypoxemia or shock may require such higher pressures. In an attempt to improve patient tolerability and deliver higher pressures, a transparent helmet has been proposed as a novel interface for non-invasive ventilation. The helmet is made of transparent latex-free PVC with a soft collar that adheres to the neck ensuring a seal when inflated (figure 3). It encloses the entire head and neck of the patient and is secured by two armpit braces. The design of the helmet confers some important advantages: 1) the transparency allows the patient to interact with the environment; 2) the lack of contact to the face lowers the risk of skin necrosis; 3) the helmet avoids problems of leaking with higher airway pressures that are seen with the face mask. Accordingly, it can be used to deliver airway pressures up to 40 cm H<sub>2</sub>O without leaking. Such higher pressures are more often needed to provide effective mechanical ventilation to patients with hypoxemic respiratory failure and/or shock; 4) it can be applied to any patient regardless of facial contour.<sup>xxii</sup>

The helmet interface has been compared to face mask in small case control studies for the treatment of hypoxemic respiratory failure (AHRF). While both interfaces have similar improvement of oxygenation, intubation rates, and mortality, the helmet had good tolerability that allowed for longer continuous application of noninvasive ventilation and in some cases sustained improvement of gas exchange even after discontinuation of therapy in immunocompromised patients,<sup>xxii,xxiii</sup> non-cardiogenic acute hypoxemic respiratory failure,<sup>xxii</sup> and acute cardiogenic pulmonary edema<sup>xxii</sup>. Given this initial experience and success with helmet ventilation, larger randomized studies comparing this intervention to face mask in patients with AHRF and shock need to be done to understand the potential benefits of helmet ventilation.

**Purpose:**

The objective of our study is to evaluate the efficacy of helmet ventilation as compared with face mask ventilation in patients with acute hypoxemic respiratory failure and evidence of shock, specifically assessing improvement of oxygenation, need for mechanical ventilation, and rates of ICU complications.

**Hypothesis:**

Noninvasive positive pressure ventilation delivered by helmet will improve oxygenation and avoid the need for endotracheal intubation in some patients with hypoxemic respiratory failure and shock. This may result in improved outcomes with decreased rates of ICU related complications.

**Methods:***Study Design*

---

We propose a single center randomized controlled trial studying the efficacy of noninvasive ventilation delivered via helmet in patients with acute hypoxemic respiratory failure (AHRF) and shock. All patients admitted to the adult medical intensive care unit at the University of Chicago will be screened for eligibility.

### *Subject Inclusion*

Patients aged  $\geq 18$  years of age who require noninvasive mechanical ventilation via facemask for  $\geq 8$  hours for the management of non-cardiogenic acute hypoxemic respiratory failure (AHRF) and/or shock will be eligible for enrollment. Additional inclusion criteria include:

- Intact airway protective gag reflex
- Able to follow instructions (e.g. squeeze hand on command, eye contact with care provider, stick out tongue on command)

Acute hypoxemic respiratory failure will be defined as moderate to severe dyspnea, pulmonary infiltrates, and PaO<sub>2</sub>/FIO<sub>2</sub> ratio less than 300.

Shock will be defined as mean arterial pressure was less than 70 mm Hg or the systolic blood pressure was less than 100 mm Hg despite administration of intravenous fluids (at least 1000 ml of crystalloids or 500 ml of colloids, unless there was an elevation in the central venous pressure to  $>12$  mm Hg or in pulmonary-artery occlusion pressure to  $>14$  mm Hg) and if there were signs of tissue hypoperfusion (e.g., altered mental state, mottled skin, urine output of  $<0.5$  ml per kilogram of body weight for 1 hour, or a serum lactate level of  $>2$  mmol per liter)<sup>xxii</sup>.

### *Subject exclusion*

The criteria for exclusion include:

- Cardiopulmonary arrest
- Glasgow coma scale  $<8$
- Absence of airway protective gag reflex
- Elevated intracranial pressure
- Tracheostomy
- Upper airway obstruction
- Pregnancy.
- Patients who refuse to undergo endotracheal intubation, whatever the initial therapeutic approach

### *Helmet group*

Patients randomized to the intervention group will switch from noninvasive ventilation delivered via facemask to a latex-free helmet connected to the ventilator by conventional tubing. The helmet contains the head and the neck of the patient, has a rigid ring and is secured by two armpit braces; a soft collar adheres to the neck and ensures a sealed connection once the helmet is inflated. The rigid ring has an opening for the passage of nasogastric tube (if needed).

---

Patients randomized to helmet ventilation will have the helmet applied and connected to a ventilator. The ventilator delivers pressure through the helmet inlet tubing and exhaled breaths are released through the helmet outlet tubing. The positive end-expiratory pressure (PEEP) will be increased in increments of 2-3 cmH<sub>2</sub>O to improve peripheral oxygen saturation of at least 90% at an inspired oxygen requirement (FiO<sub>2</sub>) of ≤ 60%. Pressure support will be increased in increments of 2-3cmH<sub>2</sub>O to obtain respiratory rate <25 breaths/min and disappearance of accessory muscle activity. After application of the helmet, arterial blood gas sampling will be utilized to follow gas-exchange; this is a part of usual care for the management of patients with acute hypoxemic respiratory failure and/or shock. Noninvasive support will be reduced progressively in accordance to clinical improvement and will be discontinued if patient maintains respiratory rate <30breaths/min and PaO<sub>2</sub> >75mm Hg with FiO<sub>2</sub> 0.5 without ventilatory support. If endotracheal intubation is required, the helmet will be removed and the patient will be intubated without delay.

#### *Control Group*

Patients assigned to the control group will continue to wear face mask for delivery of noninvasive ventilation. The expiratory positive airway pressure will be titrated in 2-3cm H<sub>2</sub>O increments to achieve oxygen saturation of 90% at lowest possible FiO<sub>2</sub> (goal FiO<sub>2</sub> 0.6 or less). The inspiratory positive airway pressure will be titrated as well to decrease tachypnea (<25 breaths/min) and improve work of breathing. Blood gas analysis will be obtained to determine appropriate gas exchange.

Predetermined criteria for intubation for both groups will include:

- Inability to achieve an arterial oxygen saturation by pulse oximetry or arterial blood gas ≥ 88%
- Respiratory rate > 36 breaths/min
- Loss of ability to maintain ventilation to keep arterial blood pH ≥ 7.20
- Loss of protective airway gag reflex (seizure disorder, severe encephalopathy, Glasgow Coma Scale <8)
- Respiratory or cardiac arrest
- Intolerance of the helmet or face mask
- Development of airway bleeding, persistent vomiting, and development of copious tracheal secretions.

Patients who require endotracheal intubation will have initial ventilator settings of assist-control mode with delivery of tidal volumes of 6mL/kg of ideal body weight, and titration of PEEP to achieve oxygen saturation of 90% at lowest possible FiO<sub>2</sub> (goal FiO<sub>2</sub> 0.6 or less). Daily interruption of sedation, awakening and breathing trials will be performed per primary team.

If an enrolled patient is randomized to helmet noninvasive ventilation after intubation, they will undergo interruption of sedation and extubation with immediate placement of the helmet and initiation on noninvasive ventilation. Early initiation of noninvasive ventilation



---

in patients who do not meet start criteria for extubation to facilitate early extubation has been associated with decreased mortality, ventilator associated pneumonia, and ventilator days.<sup>xxii</sup>

### **Data Collection:**

All study patients during hospitalization will have:

1. General Data collection:
  - Demographic information, including medical history number, age, race, gender
  - Details of current illness, including diagnosis, interventions, radiology imaging, laboratory results. Severity of illness scoring will occur (APACHE II – see Appendix 1) as well as daily serial organ function assessments (see Appendix 2).
  - Baseline medical/surgical/functional status history
  - Dates of mechanical ventilation, ICU and hospital length of stay
  - Discharge Location
2. Daily Data Collection
  - Daily mental status evaluations, including the Richmond-Agitation-Sedation Scale (Appendix 3) and the Confusion Assessment Method (Appendix 4)
  - Muscular strength testing by physical therapists on ICU admission, ICU discharge and hospital discharge
3. All patients after discharge
  - Telephone interviews at 1, 3, 6, and 12 months after discharge (Appendix 7)
    - Lasting approximately 5 minutes in duration
    - Assessing self-reported performance of ADL's
    - Reviewing need for medical care, including re-hospitalization, rehabilitation, physician outpatient visits
    - Current weight and nutritional status

### **Endpoints:**

#### *Primary*

- Percentage of patients requiring endotracheal intubation
- Duration of mechanical ventilation
  - Noninvasive ventilation via face mask or helmet
  - Invasive mechanical ventilation via endotracheal tube
- ICU length of stay
- Hospital Mortality
- Improvement of oxygenation (defined as  $PaO_2/FiO_2 \geq 200$  or increase from baseline by 100)

#### *Secondary*

- 
- ICU complications
    - Ventilator associated pneumonia
    - Barotrauma
    - Gastrointestinal hemorrhage
    - Pulmonary embolism
    - Sacral Decubitus ulcer
    - Delirium
    - ICU acquired weakness
  - Hospital length of stay
  - Readmission to intensive care unit
  - Discharge location (home, skilled nursing facility, nursing home, rehabilitation)

### **Risks and Benefits**

The risks of this study are limited beyond those experienced during routine critical care of an intubated, mechanically ventilated patient.

- Non-invasive mechanical ventilation may be associated with failure to stabilize respiratory gas exchange. In this case, patients will be intubated and mechanically ventilated via the endotracheal tube.
- Non-invasive mechanical ventilation may be associated with failure to stabilize circulatory shock. In this case, patients will be intubated and mechanically ventilated via the endotracheal tube.
- Non-invasive mechanical ventilation may be associated with aspiration. Accordingly, only patients with an intact airway protective gag reflex will be eligible for enrollment. Aspiration is also known to occur in patients who have an endotracheal tube. Care will be taken to monitor all patients in this study for this occurrence.

---

Figure 1: Endotracheal Tube

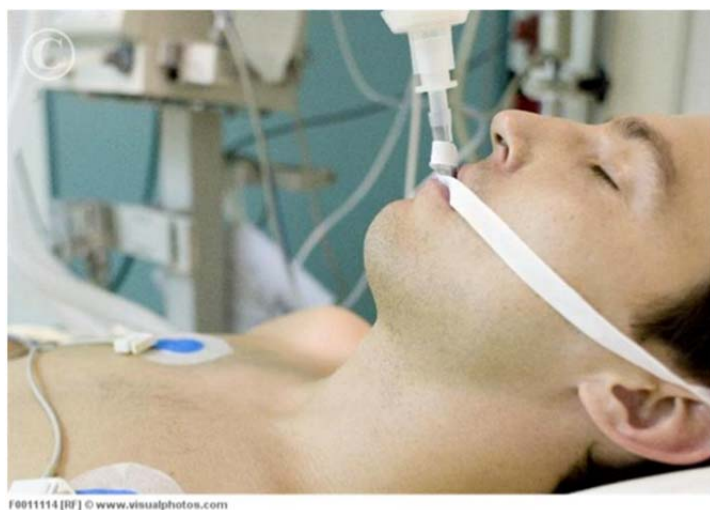

Figure 2: Facemask

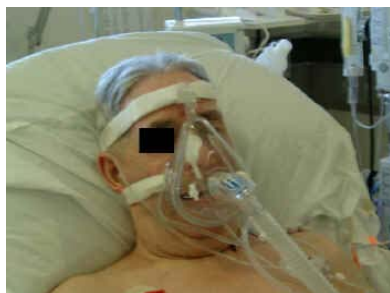

Figure 3: Helmet

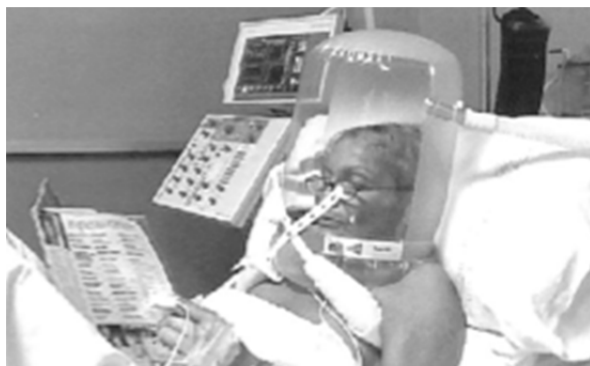

**Appendix 1: ACUTE PHYSIOLOGY AND CHRONIC HEALTH EVALUATION  
(APACHE) II SCORING SYSTEM<sup>xxii</sup>**

|                                                                                                                                                                                                                                                                                                                                                                                                                                                                                                                                                                                                                                                           |                                                                                   | + 4                                                                                                                                                                                                                                                                                                                                                                                                                                                                                                                                                                                                                                                                                                                                                                                                                                                                                                                                                                                                                                                                                                                                                                                                                                                                                                                                                                                                                                                                                                                                                                                                                                               | + 3                        | + 2      | + 1       | 0         | + 1       | + 2       | + 3     | + 4    | MINIMUM | MAXIMUM | SCORE |                         |                                                      |                             |              |                                                        |                      |                             |                                                                                   |                         |                                  |                                       |                            |                          |                              |                                 |                            |                      |                                  |  |                      |  |                      |  |                      |  |  |  |
|-----------------------------------------------------------------------------------------------------------------------------------------------------------------------------------------------------------------------------------------------------------------------------------------------------------------------------------------------------------------------------------------------------------------------------------------------------------------------------------------------------------------------------------------------------------------------------------------------------------------------------------------------------------|-----------------------------------------------------------------------------------|---------------------------------------------------------------------------------------------------------------------------------------------------------------------------------------------------------------------------------------------------------------------------------------------------------------------------------------------------------------------------------------------------------------------------------------------------------------------------------------------------------------------------------------------------------------------------------------------------------------------------------------------------------------------------------------------------------------------------------------------------------------------------------------------------------------------------------------------------------------------------------------------------------------------------------------------------------------------------------------------------------------------------------------------------------------------------------------------------------------------------------------------------------------------------------------------------------------------------------------------------------------------------------------------------------------------------------------------------------------------------------------------------------------------------------------------------------------------------------------------------------------------------------------------------------------------------------------------------------------------------------------------------|----------------------------|----------|-----------|-----------|-----------|-----------|---------|--------|---------|---------|-------|-------------------------|------------------------------------------------------|-----------------------------|--------------|--------------------------------------------------------|----------------------|-----------------------------|-----------------------------------------------------------------------------------|-------------------------|----------------------------------|---------------------------------------|----------------------------|--------------------------|------------------------------|---------------------------------|----------------------------|----------------------|----------------------------------|--|----------------------|--|----------------------|--|----------------------|--|--|--|
| PHYSIOLOGY                                                                                                                                                                                                                                                                                                                                                                                                                                                                                                                                                                                                                                                | VITAL SIGNS                                                                       | temp °C                                                                                                                                                                                                                                                                                                                                                                                                                                                                                                                                                                                                                                                                                                                                                                                                                                                                                                                                                                                                                                                                                                                                                                                                                                                                                                                                                                                                                                                                                                                                                                                                                                           | ≥ 41                       | 39-40.9  | 38.5-38.9 | 36-38.4   | 34-35.9   | 32-33.9   | 30-31.9 | ≤ 29.9 |         |         |       |                         |                                                      |                             |              |                                                        |                      |                             |                                                                                   |                         |                                  |                                       |                            |                          |                              |                                 |                            |                      |                                  |  |                      |  |                      |  |                      |  |  |  |
|                                                                                                                                                                                                                                                                                                                                                                                                                                                                                                                                                                                                                                                           |                                                                                   | BPs/d                                                                                                                                                                                                                                                                                                                                                                                                                                                                                                                                                                                                                                                                                                                                                                                                                                                                                                                                                                                                                                                                                                                                                                                                                                                                                                                                                                                                                                                                                                                                                                                                                                             |                            |          |           |           |           |           |         |        |         |         |       |                         |                                                      |                             |              |                                                        |                      |                             |                                                                                   |                         |                                  |                                       |                            |                          |                              |                                 |                            |                      |                                  |  |                      |  |                      |  |                      |  |  |  |
|                                                                                                                                                                                                                                                                                                                                                                                                                                                                                                                                                                                                                                                           |                                                                                   | mean                                                                                                                                                                                                                                                                                                                                                                                                                                                                                                                                                                                                                                                                                                                                                                                                                                                                                                                                                                                                                                                                                                                                                                                                                                                                                                                                                                                                                                                                                                                                                                                                                                              | ≥ 160                      | 130-159  | 110-129   | 70-109    | 50-69     | ≤ 49      |         |        |         |         |       |                         |                                                      |                             |              |                                                        |                      |                             |                                                                                   |                         |                                  |                                       |                            |                          |                              |                                 |                            |                      |                                  |  |                      |  |                      |  |                      |  |  |  |
|                                                                                                                                                                                                                                                                                                                                                                                                                                                                                                                                                                                                                                                           |                                                                                   | HR(vent)                                                                                                                                                                                                                                                                                                                                                                                                                                                                                                                                                                                                                                                                                                                                                                                                                                                                                                                                                                                                                                                                                                                                                                                                                                                                                                                                                                                                                                                                                                                                                                                                                                          | ≥ 180                      | 140-179  | 110-139   | 70-109    | 55-69     | 40-54     | ≤ 39    |        |         |         |       |                         |                                                      |                             |              |                                                        |                      |                             |                                                                                   |                         |                                  |                                       |                            |                          |                              |                                 |                            |                      |                                  |  |                      |  |                      |  |                      |  |  |  |
|                                                                                                                                                                                                                                                                                                                                                                                                                                                                                                                                                                                                                                                           |                                                                                   | RR(otal)                                                                                                                                                                                                                                                                                                                                                                                                                                                                                                                                                                                                                                                                                                                                                                                                                                                                                                                                                                                                                                                                                                                                                                                                                                                                                                                                                                                                                                                                                                                                                                                                                                          | ≥ 50                       | 35-49    | 25-34     | 12-24     | 10-11     | 6-9       | ≤ 5     |        |         |         |       |                         |                                                      |                             |              |                                                        |                      |                             |                                                                                   |                         |                                  |                                       |                            |                          |                              |                                 |                            |                      |                                  |  |                      |  |                      |  |                      |  |  |  |
|                                                                                                                                                                                                                                                                                                                                                                                                                                                                                                                                                                                                                                                           | OXYGENATION                                                                       | *ABC FIO <sub>2</sub>                                                                                                                                                                                                                                                                                                                                                                                                                                                                                                                                                                                                                                                                                                                                                                                                                                                                                                                                                                                                                                                                                                                                                                                                                                                                                                                                                                                                                                                                                                                                                                                                                             |                            |          |           |           |           |           |         |        |         |         |       |                         |                                                      |                             |              |                                                        |                      |                             |                                                                                   |                         |                                  |                                       |                            |                          |                              |                                 |                            |                      |                                  |  |                      |  |                      |  |                      |  |  |  |
|                                                                                                                                                                                                                                                                                                                                                                                                                                                                                                                                                                                                                                                           |                                                                                   | PaO <sub>2</sub>                                                                                                                                                                                                                                                                                                                                                                                                                                                                                                                                                                                                                                                                                                                                                                                                                                                                                                                                                                                                                                                                                                                                                                                                                                                                                                                                                                                                                                                                                                                                                                                                                                  |                            |          |           |           |           |           |         |        |         |         |       |                         |                                                      |                             |              |                                                        |                      |                             |                                                                                   |                         |                                  |                                       |                            |                          |                              |                                 |                            |                      |                                  |  |                      |  |                      |  |                      |  |  |  |
|                                                                                                                                                                                                                                                                                                                                                                                                                                                                                                                                                                                                                                                           |                                                                                   | PaCO <sub>2</sub>                                                                                                                                                                                                                                                                                                                                                                                                                                                                                                                                                                                                                                                                                                                                                                                                                                                                                                                                                                                                                                                                                                                                                                                                                                                                                                                                                                                                                                                                                                                                                                                                                                 |                            |          |           |           |           |           |         |        |         |         |       |                         |                                                      |                             |              |                                                        |                      |                             |                                                                                   |                         |                                  |                                       |                            |                          |                              |                                 |                            |                      |                                  |  |                      |  |                      |  |                      |  |  |  |
|                                                                                                                                                                                                                                                                                                                                                                                                                                                                                                                                                                                                                                                           |                                                                                   | pH                                                                                                                                                                                                                                                                                                                                                                                                                                                                                                                                                                                                                                                                                                                                                                                                                                                                                                                                                                                                                                                                                                                                                                                                                                                                                                                                                                                                                                                                                                                                                                                                                                                | ≥ 7.7                      | 7.6-7.69 | 7.5-7.59  | 7.33-7.49 | 7.25-7.32 | 7.15-7.24 | < 7.15  |        |         |         |       |                         |                                                      |                             |              |                                                        |                      |                             |                                                                                   |                         |                                  |                                       |                            |                          |                              |                                 |                            |                      |                                  |  |                      |  |                      |  |                      |  |  |  |
|                                                                                                                                                                                                                                                                                                                                                                                                                                                                                                                                                                                                                                                           |                                                                                   | AaDO <sub>2</sub>                                                                                                                                                                                                                                                                                                                                                                                                                                                                                                                                                                                                                                                                                                                                                                                                                                                                                                                                                                                                                                                                                                                                                                                                                                                                                                                                                                                                                                                                                                                                                                                                                                 | ≥ 500                      | 350-499  | 200-349   | < 200     |           |           |         |        |         |         |       |                         |                                                      |                             |              |                                                        |                      |                             |                                                                                   |                         |                                  |                                       |                            |                          |                              |                                 |                            |                      |                                  |  |                      |  |                      |  |                      |  |  |  |
| LABS                                                                                                                                                                                                                                                                                                                                                                                                                                                                                                                                                                                                                                                      | serum CO <sub>2</sub>                                                             | ≥ 52                                                                                                                                                                                                                                                                                                                                                                                                                                                                                                                                                                                                                                                                                                                                                                                                                                                                                                                                                                                                                                                                                                                                                                                                                                                                                                                                                                                                                                                                                                                                                                                                                                              | 41-51.9                    | 32-40.9  | 22-31.9   | 18-21.9   | 15-17.9   | < 15      |         |        |         |         |       |                         |                                                      |                             |              |                                                        |                      |                             |                                                                                   |                         |                                  |                                       |                            |                          |                              |                                 |                            |                      |                                  |  |                      |  |                      |  |                      |  |  |  |
|                                                                                                                                                                                                                                                                                                                                                                                                                                                                                                                                                                                                                                                           | Na+                                                                               | ≥ 180                                                                                                                                                                                                                                                                                                                                                                                                                                                                                                                                                                                                                                                                                                                                                                                                                                                                                                                                                                                                                                                                                                                                                                                                                                                                                                                                                                                                                                                                                                                                                                                                                                             | 160-179                    | 155-159  | 150-154   | 130-149   | 120-129   | 111-119   | ≤ 110   |        |         |         |       |                         |                                                      |                             |              |                                                        |                      |                             |                                                                                   |                         |                                  |                                       |                            |                          |                              |                                 |                            |                      |                                  |  |                      |  |                      |  |                      |  |  |  |
|                                                                                                                                                                                                                                                                                                                                                                                                                                                                                                                                                                                                                                                           | K+                                                                                | ≥ 7                                                                                                                                                                                                                                                                                                                                                                                                                                                                                                                                                                                                                                                                                                                                                                                                                                                                                                                                                                                                                                                                                                                                                                                                                                                                                                                                                                                                                                                                                                                                                                                                                                               | 6-6.9                      | 5.5-5.9  | 3.5-5.4   | 3-3.4     | 2.5-2.9   | < 2.5     |         |        |         |         |       |                         |                                                      |                             |              |                                                        |                      |                             |                                                                                   |                         |                                  |                                       |                            |                          |                              |                                 |                            |                      |                                  |  |                      |  |                      |  |                      |  |  |  |
|                                                                                                                                                                                                                                                                                                                                                                                                                                                                                                                                                                                                                                                           | **Creat                                                                           | ≥ 3.5                                                                                                                                                                                                                                                                                                                                                                                                                                                                                                                                                                                                                                                                                                                                                                                                                                                                                                                                                                                                                                                                                                                                                                                                                                                                                                                                                                                                                                                                                                                                                                                                                                             | 2-3.4                      | 1.5-1.9  | 0.6-1.4   | < 0.8     |           |           |         |        |         |         |       |                         |                                                      |                             |              |                                                        |                      |                             |                                                                                   |                         |                                  |                                       |                            |                          |                              |                                 |                            |                      |                                  |  |                      |  |                      |  |                      |  |  |  |
|                                                                                                                                                                                                                                                                                                                                                                                                                                                                                                                                                                                                                                                           | Hct                                                                               | ≥ 60                                                                                                                                                                                                                                                                                                                                                                                                                                                                                                                                                                                                                                                                                                                                                                                                                                                                                                                                                                                                                                                                                                                                                                                                                                                                                                                                                                                                                                                                                                                                                                                                                                              | 50-59.9                    | 46-49.9  | 30-45.9   | 20-29.9   | < 20      |           |         |        |         |         |       |                         |                                                      |                             |              |                                                        |                      |                             |                                                                                   |                         |                                  |                                       |                            |                          |                              |                                 |                            |                      |                                  |  |                      |  |                      |  |                      |  |  |  |
| WBC                                                                                                                                                                                                                                                                                                                                                                                                                                                                                                                                                                                                                                                       | ≥ 40                                                                              | 20-39.9                                                                                                                                                                                                                                                                                                                                                                                                                                                                                                                                                                                                                                                                                                                                                                                                                                                                                                                                                                                                                                                                                                                                                                                                                                                                                                                                                                                                                                                                                                                                                                                                                                           | 15-19.9                    | 3-14.9   | 1-2.9     | < 1       |           |           |         |        |         |         |       |                         |                                                      |                             |              |                                                        |                      |                             |                                                                                   |                         |                                  |                                       |                            |                          |                              |                                 |                            |                      |                                  |  |                      |  |                      |  |                      |  |  |  |
| GLASGOW COMA                                                                                                                                                                                                                                                                                                                                                                                                                                                                                                                                                                                                                                              | APACHE                                                                            | 0                                                                                                                                                                                                                                                                                                                                                                                                                                                                                                                                                                                                                                                                                                                                                                                                                                                                                                                                                                                                                                                                                                                                                                                                                                                                                                                                                                                                                                                                                                                                                                                                                                                 | +1                         | +2       | +3        | +4        | +5        | +6        | +7      | +8     | +9      | +10     | +11   | +12                     | SCORE                                                |                             |              |                                                        |                      |                             |                                                                                   |                         |                                  |                                       |                            |                          |                              |                                 |                            |                      |                                  |  |                      |  |                      |  |                      |  |  |  |
|                                                                                                                                                                                                                                                                                                                                                                                                                                                                                                                                                                                                                                                           | GC SCORE                                                                          | 15                                                                                                                                                                                                                                                                                                                                                                                                                                                                                                                                                                                                                                                                                                                                                                                                                                                                                                                                                                                                                                                                                                                                                                                                                                                                                                                                                                                                                                                                                                                                                                                                                                                | 14                         | 13       | 12        | 11        | 10        | 9         | 8       | 7      | 6       | 5       | 4     | 3                       |                                                      |                             |              |                                                        |                      |                             |                                                                                   |                         |                                  |                                       |                            |                          |                              |                                 |                            |                      |                                  |  |                      |  |                      |  |                      |  |  |  |
|                                                                                                                                                                                                                                                                                                                                                                                                                                                                                                                                                                                                                                                           | (Circle appropriate score for each category)                                      | <table border="0" style="width: 100%; border-collapse: collapse;"> <tr> <td style="width: 25%;"></td> <td style="width: 25%; text-align: center;"><b>VERBAL<br/>NON-INTUBATED</b></td> <td style="width: 25%; text-align: center;"><b>VERBAL<br/>INTUBATED</b></td> <td style="width: 25%; text-align: center;"><b>MOTOR</b></td> </tr> <tr> <td style="text-align: center;"><b>EYE</b></td> <td style="text-align: center;"><b>4 SPONTANEOUS</b></td> <td style="text-align: center;"><b>5 ORIENTED AND TALKS</b></td> <td style="text-align: center;"><b>6 VERBAL COMMAND</b></td> </tr> <tr> <td style="text-align: center;"><b>3 VERBAL COMMAND</b></td> <td style="text-align: center;"><b>4 DISORIENTED &amp; TALKS</b></td> <td style="text-align: center;"><b>3 QUESTIONABLE ABILITY TO TALK</b></td> <td style="text-align: center;"><b>5 LOCALIZES TO PAIN</b></td> </tr> <tr> <td style="text-align: center;"><b>2 PAINFUL STIMULI</b></td> <td style="text-align: center;"><b>3 INAPPROPRIATE WORDS</b></td> <td style="text-align: center;"><b>1 GENERALLY UNRESPONSIVE</b></td> <td style="text-align: center;"><b>4 WITHDRAWS TO PAIN</b></td> </tr> <tr> <td style="text-align: center;"><b>1 NO RESPONSE</b></td> <td style="text-align: center;"><b>2 INCOMPREHENSIBLE SOUNDS</b></td> <td></td> <td style="text-align: center;"><b>3 DECORTICATE</b></td> </tr> <tr> <td></td> <td style="text-align: center;"><b>1 NO RESPONSE</b></td> <td></td> <td style="text-align: center;"><b>2 DECEREBRATE</b></td> </tr> <tr> <td></td> <td></td> <td></td> <td style="text-align: center;"><b>1 NO RESPONSE</b></td> </tr> </table> |                            |          |           |           |           |           |         |        |         |         |       |                         | <b>VERBAL<br/>NON-INTUBATED</b>                      | <b>VERBAL<br/>INTUBATED</b> | <b>MOTOR</b> | <b>EYE</b>                                             | <b>4 SPONTANEOUS</b> | <b>5 ORIENTED AND TALKS</b> | <b>6 VERBAL COMMAND</b>                                                           | <b>3 VERBAL COMMAND</b> | <b>4 DISORIENTED &amp; TALKS</b> | <b>3 QUESTIONABLE ABILITY TO TALK</b> | <b>5 LOCALIZES TO PAIN</b> | <b>2 PAINFUL STIMULI</b> | <b>3 INAPPROPRIATE WORDS</b> | <b>1 GENERALLY UNRESPONSIVE</b> | <b>4 WITHDRAWS TO PAIN</b> | <b>1 NO RESPONSE</b> | <b>2 INCOMPREHENSIBLE SOUNDS</b> |  | <b>3 DECORTICATE</b> |  | <b>1 NO RESPONSE</b> |  | <b>2 DECEREBRATE</b> |  |  |  |
|                                                                                                                                                                                                                                                                                                                                                                                                                                                                                                                                                                                                                                                           | <b>VERBAL<br/>NON-INTUBATED</b>                                                   | <b>VERBAL<br/>INTUBATED</b>                                                                                                                                                                                                                                                                                                                                                                                                                                                                                                                                                                                                                                                                                                                                                                                                                                                                                                                                                                                                                                                                                                                                                                                                                                                                                                                                                                                                                                                                                                                                                                                                                       | <b>MOTOR</b>               |          |           |           |           |           |         |        |         |         |       |                         |                                                      |                             |              |                                                        |                      |                             |                                                                                   |                         |                                  |                                       |                            |                          |                              |                                 |                            |                      |                                  |  |                      |  |                      |  |                      |  |  |  |
| <b>EYE</b>                                                                                                                                                                                                                                                                                                                                                                                                                                                                                                                                                                                                                                                | <b>4 SPONTANEOUS</b>                                                              | <b>5 ORIENTED AND TALKS</b>                                                                                                                                                                                                                                                                                                                                                                                                                                                                                                                                                                                                                                                                                                                                                                                                                                                                                                                                                                                                                                                                                                                                                                                                                                                                                                                                                                                                                                                                                                                                                                                                                       | <b>6 VERBAL COMMAND</b>    |          |           |           |           |           |         |        |         |         |       |                         |                                                      |                             |              |                                                        |                      |                             |                                                                                   |                         |                                  |                                       |                            |                          |                              |                                 |                            |                      |                                  |  |                      |  |                      |  |                      |  |  |  |
| <b>3 VERBAL COMMAND</b>                                                                                                                                                                                                                                                                                                                                                                                                                                                                                                                                                                                                                                   | <b>4 DISORIENTED &amp; TALKS</b>                                                  | <b>3 QUESTIONABLE ABILITY TO TALK</b>                                                                                                                                                                                                                                                                                                                                                                                                                                                                                                                                                                                                                                                                                                                                                                                                                                                                                                                                                                                                                                                                                                                                                                                                                                                                                                                                                                                                                                                                                                                                                                                                             | <b>5 LOCALIZES TO PAIN</b> |          |           |           |           |           |         |        |         |         |       |                         |                                                      |                             |              |                                                        |                      |                             |                                                                                   |                         |                                  |                                       |                            |                          |                              |                                 |                            |                      |                                  |  |                      |  |                      |  |                      |  |  |  |
| <b>2 PAINFUL STIMULI</b>                                                                                                                                                                                                                                                                                                                                                                                                                                                                                                                                                                                                                                  | <b>3 INAPPROPRIATE WORDS</b>                                                      | <b>1 GENERALLY UNRESPONSIVE</b>                                                                                                                                                                                                                                                                                                                                                                                                                                                                                                                                                                                                                                                                                                                                                                                                                                                                                                                                                                                                                                                                                                                                                                                                                                                                                                                                                                                                                                                                                                                                                                                                                   | <b>4 WITHDRAWS TO PAIN</b> |          |           |           |           |           |         |        |         |         |       |                         |                                                      |                             |              |                                                        |                      |                             |                                                                                   |                         |                                  |                                       |                            |                          |                              |                                 |                            |                      |                                  |  |                      |  |                      |  |                      |  |  |  |
| <b>1 NO RESPONSE</b>                                                                                                                                                                                                                                                                                                                                                                                                                                                                                                                                                                                                                                      | <b>2 INCOMPREHENSIBLE SOUNDS</b>                                                  |                                                                                                                                                                                                                                                                                                                                                                                                                                                                                                                                                                                                                                                                                                                                                                                                                                                                                                                                                                                                                                                                                                                                                                                                                                                                                                                                                                                                                                                                                                                                                                                                                                                   | <b>3 DECORTICATE</b>       |          |           |           |           |           |         |        |         |         |       |                         |                                                      |                             |              |                                                        |                      |                             |                                                                                   |                         |                                  |                                       |                            |                          |                              |                                 |                            |                      |                                  |  |                      |  |                      |  |                      |  |  |  |
|                                                                                                                                                                                                                                                                                                                                                                                                                                                                                                                                                                                                                                                           | <b>1 NO RESPONSE</b>                                                              |                                                                                                                                                                                                                                                                                                                                                                                                                                                                                                                                                                                                                                                                                                                                                                                                                                                                                                                                                                                                                                                                                                                                                                                                                                                                                                                                                                                                                                                                                                                                                                                                                                                   | <b>2 DECEREBRATE</b>       |          |           |           |           |           |         |        |         |         |       |                         |                                                      |                             |              |                                                        |                      |                             |                                                                                   |                         |                                  |                                       |                            |                          |                              |                                 |                            |                      |                                  |  |                      |  |                      |  |                      |  |  |  |
|                                                                                                                                                                                                                                                                                                                                                                                                                                                                                                                                                                                                                                                           |                                                                                   |                                                                                                                                                                                                                                                                                                                                                                                                                                                                                                                                                                                                                                                                                                                                                                                                                                                                                                                                                                                                                                                                                                                                                                                                                                                                                                                                                                                                                                                                                                                                                                                                                                                   | <b>1 NO RESPONSE</b>       |          |           |           |           |           |         |        |         |         |       |                         |                                                      |                             |              |                                                        |                      |                             |                                                                                   |                         |                                  |                                       |                            |                          |                              |                                 |                            |                      |                                  |  |                      |  |                      |  |                      |  |  |  |
| AGE & HEALTH                                                                                                                                                                                                                                                                                                                                                                                                                                                                                                                                                                                                                                              | AGE                                                                               | 0                                                                                                                                                                                                                                                                                                                                                                                                                                                                                                                                                                                                                                                                                                                                                                                                                                                                                                                                                                                                                                                                                                                                                                                                                                                                                                                                                                                                                                                                                                                                                                                                                                                 | +2                         | +3       | +5        | +6        |           |           |         |        |         |         |       | SCORE                   |                                                      |                             |              |                                                        |                      |                             |                                                                                   |                         |                                  |                                       |                            |                          |                              |                                 |                            |                      |                                  |  |                      |  |                      |  |                      |  |  |  |
|                                                                                                                                                                                                                                                                                                                                                                                                                                                                                                                                                                                                                                                           | Age Score                                                                         | ≤ 44                                                                                                                                                                                                                                                                                                                                                                                                                                                                                                                                                                                                                                                                                                                                                                                                                                                                                                                                                                                                                                                                                                                                                                                                                                                                                                                                                                                                                                                                                                                                                                                                                                              | 45-54                      | 55-64    | 65-74     | ≥ 75      |           |           |         |        |         |         |       | SCORE                   |                                                      |                             |              |                                                        |                      |                             |                                                                                   |                         |                                  |                                       |                            |                          |                              |                                 |                            |                      |                                  |  |                      |  |                      |  |                      |  |  |  |
|                                                                                                                                                                                                                                                                                                                                                                                                                                                                                                                                                                                                                                                           | CH Score                                                                          |                                                                                                                                                                                                                                                                                                                                                                                                                                                                                                                                                                                                                                                                                                                                                                                                                                                                                                                                                                                                                                                                                                                                                                                                                                                                                                                                                                                                                                                                                                                                                                                                                                                   |                            |          |           |           |           |           |         |        |         |         |       | SCORE                   |                                                      |                             |              |                                                        |                      |                             |                                                                                   |                         |                                  |                                       |                            |                          |                              |                                 |                            |                      |                                  |  |                      |  |                      |  |                      |  |  |  |
|                                                                                                                                                                                                                                                                                                                                                                                                                                                                                                                                                                                                                                                           | CH Scale                                                                          | +5                                                                                                                                                                                                                                                                                                                                                                                                                                                                                                                                                                                                                                                                                                                                                                                                                                                                                                                                                                                                                                                                                                                                                                                                                                                                                                                                                                                                                                                                                                                                                                                                                                                |                            |          |           |           |           | +2        |         |        |         |         |       |                         |                                                      |                             |              |                                                        |                      |                             |                                                                                   |                         |                                  |                                       |                            |                          |                              |                                 |                            |                      |                                  |  |                      |  |                      |  |                      |  |  |  |
| <b>NON-OP or EMERGENCY-OP</b>                                                                                                                                                                                                                                                                                                                                                                                                                                                                                                                                                                                                                             |                                                                                   |                                                                                                                                                                                                                                                                                                                                                                                                                                                                                                                                                                                                                                                                                                                                                                                                                                                                                                                                                                                                                                                                                                                                                                                                                                                                                                                                                                                                                                                                                                                                                                                                                                                   |                            |          |           |           |           |           |         |        |         |         |       | <b>ELECTIVE POST-OP</b> |                                                      |                             |              |                                                        |                      |                             |                                                                                   |                         |                                  |                                       |                            |                          |                              |                                 |                            |                      |                                  |  |                      |  |                      |  |                      |  |  |  |
| <b>WITH ANY 1 OF THE FOLLOWING CHRONIC CONDITIONS PRIOR TO THIS ILLNESS:</b>                                                                                                                                                                                                                                                                                                                                                                                                                                                                                                                                                                              |                                                                                   |                                                                                                                                                                                                                                                                                                                                                                                                                                                                                                                                                                                                                                                                                                                                                                                                                                                                                                                                                                                                                                                                                                                                                                                                                                                                                                                                                                                                                                                                                                                                                                                                                                                   |                            |          |           |           |           |           |         |        |         |         |       |                         |                                                      |                             |              |                                                        |                      |                             |                                                                                   |                         |                                  |                                       |                            |                          |                              |                                 |                            |                      |                                  |  |                      |  |                      |  |                      |  |  |  |
| <b>IF APPLIES, CIRCLE THE NUMBER CORRESPONDING TO THE CONDITION.</b>                                                                                                                                                                                                                                                                                                                                                                                                                                                                                                                                                                                      |                                                                                   |                                                                                                                                                                                                                                                                                                                                                                                                                                                                                                                                                                                                                                                                                                                                                                                                                                                                                                                                                                                                                                                                                                                                                                                                                                                                                                                                                                                                                                                                                                                                                                                                                                                   |                            |          |           |           |           |           |         |        |         |         |       |                         |                                                      |                             |              |                                                        |                      |                             |                                                                                   |                         |                                  |                                       |                            |                          |                              |                                 |                            |                      |                                  |  |                      |  |                      |  |                      |  |  |  |
| <table border="0" style="width: 100%; border-collapse: collapse;"> <tr> <td style="width: 33%;">1 LIVER -</td> <td style="width: 33%;">CIRRHOSIS WITH PORTAL HYPERTENSION or ENCEPHALOPATHY</td> <td style="width: 33%;"></td> </tr> <tr> <td>2 CVASC -</td> <td>CLASS IV ANGINA or AT REST or MIN SELF-CARE ACTIVITIES</td> <td></td> </tr> <tr> <td>3 PULM -</td> <td>CHRONIC HYPOX or HYPERCAP or POLYCYTHEMIA or PHT &gt;40 MMHG or RESPIRATOR DEPENDENT</td> <td></td> </tr> <tr> <td>4 KIDNEY -</td> <td>CHRONIC PERITONEAL or HEMODIALYSIS</td> <td></td> </tr> <tr> <td>5 IMMUNE -</td> <td>IMMUNO COMPROMISED HOST</td> <td></td> </tr> </table> |                                                                                   |                                                                                                                                                                                                                                                                                                                                                                                                                                                                                                                                                                                                                                                                                                                                                                                                                                                                                                                                                                                                                                                                                                                                                                                                                                                                                                                                                                                                                                                                                                                                                                                                                                                   |                            |          |           |           |           |           |         |        |         |         |       | 1 LIVER -               | CIRRHOSIS WITH PORTAL HYPERTENSION or ENCEPHALOPATHY |                             | 2 CVASC -    | CLASS IV ANGINA or AT REST or MIN SELF-CARE ACTIVITIES |                      | 3 PULM -                    | CHRONIC HYPOX or HYPERCAP or POLYCYTHEMIA or PHT >40 MMHG or RESPIRATOR DEPENDENT |                         | 4 KIDNEY -                       | CHRONIC PERITONEAL or HEMODIALYSIS    |                            | 5 IMMUNE -               | IMMUNO COMPROMISED HOST      |                                 |                            |                      |                                  |  |                      |  |                      |  |                      |  |  |  |
| 1 LIVER -                                                                                                                                                                                                                                                                                                                                                                                                                                                                                                                                                                                                                                                 | CIRRHOSIS WITH PORTAL HYPERTENSION or ENCEPHALOPATHY                              |                                                                                                                                                                                                                                                                                                                                                                                                                                                                                                                                                                                                                                                                                                                                                                                                                                                                                                                                                                                                                                                                                                                                                                                                                                                                                                                                                                                                                                                                                                                                                                                                                                                   |                            |          |           |           |           |           |         |        |         |         |       |                         |                                                      |                             |              |                                                        |                      |                             |                                                                                   |                         |                                  |                                       |                            |                          |                              |                                 |                            |                      |                                  |  |                      |  |                      |  |                      |  |  |  |
| 2 CVASC -                                                                                                                                                                                                                                                                                                                                                                                                                                                                                                                                                                                                                                                 | CLASS IV ANGINA or AT REST or MIN SELF-CARE ACTIVITIES                            |                                                                                                                                                                                                                                                                                                                                                                                                                                                                                                                                                                                                                                                                                                                                                                                                                                                                                                                                                                                                                                                                                                                                                                                                                                                                                                                                                                                                                                                                                                                                                                                                                                                   |                            |          |           |           |           |           |         |        |         |         |       |                         |                                                      |                             |              |                                                        |                      |                             |                                                                                   |                         |                                  |                                       |                            |                          |                              |                                 |                            |                      |                                  |  |                      |  |                      |  |                      |  |  |  |
| 3 PULM -                                                                                                                                                                                                                                                                                                                                                                                                                                                                                                                                                                                                                                                  | CHRONIC HYPOX or HYPERCAP or POLYCYTHEMIA or PHT >40 MMHG or RESPIRATOR DEPENDENT |                                                                                                                                                                                                                                                                                                                                                                                                                                                                                                                                                                                                                                                                                                                                                                                                                                                                                                                                                                                                                                                                                                                                                                                                                                                                                                                                                                                                                                                                                                                                                                                                                                                   |                            |          |           |           |           |           |         |        |         |         |       |                         |                                                      |                             |              |                                                        |                      |                             |                                                                                   |                         |                                  |                                       |                            |                          |                              |                                 |                            |                      |                                  |  |                      |  |                      |  |                      |  |  |  |
| 4 KIDNEY -                                                                                                                                                                                                                                                                                                                                                                                                                                                                                                                                                                                                                                                | CHRONIC PERITONEAL or HEMODIALYSIS                                                |                                                                                                                                                                                                                                                                                                                                                                                                                                                                                                                                                                                                                                                                                                                                                                                                                                                                                                                                                                                                                                                                                                                                                                                                                                                                                                                                                                                                                                                                                                                                                                                                                                                   |                            |          |           |           |           |           |         |        |         |         |       |                         |                                                      |                             |              |                                                        |                      |                             |                                                                                   |                         |                                  |                                       |                            |                          |                              |                                 |                            |                      |                                  |  |                      |  |                      |  |                      |  |  |  |
| 5 IMMUNE -                                                                                                                                                                                                                                                                                                                                                                                                                                                                                                                                                                                                                                                | IMMUNO COMPROMISED HOST                                                           |                                                                                                                                                                                                                                                                                                                                                                                                                                                                                                                                                                                                                                                                                                                                                                                                                                                                                                                                                                                                                                                                                                                                                                                                                                                                                                                                                                                                                                                                                                                                                                                                                                                   |                            |          |           |           |           |           |         |        |         |         |       |                         |                                                      |                             |              |                                                        |                      |                             |                                                                                   |                         |                                  |                                       |                            |                          |                              |                                 |                            |                      |                                  |  |                      |  |                      |  |                      |  |  |  |

\*IF NO ABG USE SERUM CO<sub>2</sub>

\*\*IF IN ARF DOUBLE THE CREATININE POINT SCORE

|                  |                             |  |
|------------------|-----------------------------|--|
| <b>APACHE II</b> | Physiology Points           |  |
|                  | Glasgow points              |  |
|                  | Chronic Health Points       |  |
|                  | Age Points                  |  |
|                  | <b>APACHE SCORE (TOTAL)</b> |  |

## Appendix 2: Serial Organ Function Assessment[18]<sup>xxii</sup>

| SOFA score                                                                              | 1            | 2                                        | 3                                       | 4              |
|-----------------------------------------------------------------------------------------|--------------|------------------------------------------|-----------------------------------------|----------------|
|                                                                                         |              |                                          | Respiration with respiratory support    |                |
| Respiration with respiratory support<br>PaO <sub>2</sub> /FiO <sub>2</sub> , mmHg       | < 400        | < 300                                    | < 200                                   | < 100          |
| Coagulation<br>Platelets x10 <sup>3</sup> /mm <sup>3</sup>                              | < 150        | < 100                                    | < 50                                    | < 20           |
| Liver<br>Bilirubin, mg/dl                                                               | 1.2-1.9      | 2-5.9                                    | 6-11.9                                  | > 12           |
| Cardiovascular<br>Hypotension<br>>15 or<br>(doses in ug/kg·min)<br>catecholamines > 0,1 | MAP < 70mmHg | Dopamine ≤ 5 or<br>Dobutamine (any dose) | Dopamine > 5 or<br>catecholamines ≤ 0.1 | Dopamine       |
| Neurologic<br>Glasgow Coma Score                                                        | 13-14        | 10-12                                    | 6-9                                     | < 6            |
| Renal<br>Creatinine mg/dl or<br>Urine output ml/zi                                      | 1.2-1.9      | 2-3.4                                    | 3.5-4.9<br>(200-500)                    | > 5<br>(< 200) |

### Appendix 3. Richmond agitation–sedation scale<sup>xxii</sup>

**TABLE 1. RICHMOND AGITATION–SEDATION SCALE**

| Score | Term              | Description                                                                                     |
|-------|-------------------|-------------------------------------------------------------------------------------------------|
| +4    | Combative         | Overtly combative or violent; immediate danger to staff                                         |
| +3    | Very agitation    | Pulls on or removes tube(s) or catheter(s) or has aggressive behavior toward staff              |
| +2    | Agitated          | Frequent nonpurposeful movement or patient–ventilator dyssynchrony                              |
| +1    | Restless          | Anxious or apprehensive but movements not aggressive or vigorous                                |
| 0     | Alert and calm    |                                                                                                 |
| –1    | Drowsy            | Not fully alert, but has sustained (more than 10 seconds) awakening, with eye contact, to voice |
| –2    | Light sedation    | Briefly (less than 10 seconds) awakens with eye contact to voice                                |
| –3    | Moderate sedation | Any movement (but no eye contact) to voice                                                      |
| –4    | Deep sedation     | No response to voice, but any movement to physical stimulation                                  |
| –5    | Unarousable       | No response to voice or physical stimulation                                                    |

**Procedure**

1. Observe patient. Is patient alert and calm (score 0)?  
Does patient have behavior that is consistent with restlessness or agitation (score +1 to +4 using the criteria listed above, under DESCRIPTION)?
2. If patient is not alert, in a loud speaking voice state patient’s name and direct patient to open eyes and look at speaker. Repeat once if necessary. Can prompt patient to continue looking at speaker.  
Patient has eye opening and eye contact, which is sustained for more than 10 seconds (score –1).  
Patient has eye opening and eye contact, but this is not sustained for 10 seconds (score –2).  
Patient has any movement in response to voice, excluding eye contact (score –3).
3. If patient does not respond to voice, physically stimulate patient by shaking shoulder and then rubbing sternum if there is no response to shaking shoulder.  
Patient has any movement to physical stimulation (score –4).  
Patient has no response to voice or physical stimulation (score –5).

**APPENDIX 4: Confusion Assessment Method (CAM-ICU)<sup>xxii</sup>**

| Features and Descriptions                                                                                                                                                                                                                                                                                                                                                                                                                                                                                                                                                                                                                                                                                                                                                                                                                                                                                                                                                                              | Absent | Present |
|--------------------------------------------------------------------------------------------------------------------------------------------------------------------------------------------------------------------------------------------------------------------------------------------------------------------------------------------------------------------------------------------------------------------------------------------------------------------------------------------------------------------------------------------------------------------------------------------------------------------------------------------------------------------------------------------------------------------------------------------------------------------------------------------------------------------------------------------------------------------------------------------------------------------------------------------------------------------------------------------------------|--------|---------|
| <b>I. Acute onset or fluctuating course*</b>                                                                                                                                                                                                                                                                                                                                                                                                                                                                                                                                                                                                                                                                                                                                                                                                                                                                                                                                                           |        |         |
| A. Is there evidence of an acute change in mental status from the baseline?<br>B. Or, did the (abnormal) behavior fluctuate during the past 24 hours, that is, tend to come and go or increase and decrease in severity as evidenced by fluctuations on the Richmond Agitation Sedation Scale (RASS) or the Glasgow Coma Scale?                                                                                                                                                                                                                                                                                                                                                                                                                                                                                                                                                                                                                                                                        |        |         |
| <b>II. Inattention†</b>                                                                                                                                                                                                                                                                                                                                                                                                                                                                                                                                                                                                                                                                                                                                                                                                                                                                                                                                                                                |        |         |
| Did the patient have difficulty focusing attention as evidenced by a score of less than 8 correct answers on either the visual or auditory components of the Attention Screening Examination (ASE)?                                                                                                                                                                                                                                                                                                                                                                                                                                                                                                                                                                                                                                                                                                                                                                                                    |        |         |
| <b>III. Disorganized thinking</b>                                                                                                                                                                                                                                                                                                                                                                                                                                                                                                                                                                                                                                                                                                                                                                                                                                                                                                                                                                      |        |         |
| Is there evidence of disorganized or incoherent thinking as evidenced by incorrect answers to 3 or more of the 4 questions and inability to follow the commands?<br>Questions<br>1. Will a stone float on water?<br>2. Are there fish in the sea?<br>3. Does 1 pound weigh more than 2 pounds?<br>4. Can you use a hammer to pound a nail?<br>Commands<br>1. Are you having unclear thinking?<br>2. Hold up this many fingers. (Examiner holds 2 fingers in front of the patient.)<br>3. Now do the same thing with the other hand (without holding the 2 fingers in front of the patient).<br>(If the patient is already extubated from the ventilator, determine whether the patient's thinking is disorganized or incoherent, such as rambling or irrelevant conversation, unclear or illogical flow of ideas, or unpredictable switching from subject to subject.)                                                                                                                                 |        |         |
| <b>IV. Altered level of consciousness</b>                                                                                                                                                                                                                                                                                                                                                                                                                                                                                                                                                                                                                                                                                                                                                                                                                                                                                                                                                              |        |         |
| Is the patient's level of consciousness anything other than alert, such as being vigilant or lethargic or in a stupor, or coma?<br>Alert: spontaneously fully aware of environment and interacts appropriately<br>Vigilant: hyperalert<br>Lethargic: drowsy but easily aroused, unaware of some elements in the environment or not spontaneously interacting with the interviewer; becomes fully aware and appropriately interactive when prodded minimally<br>Stupor: difficult to arouse, unaware of some or all elements in the environment or not spontaneously interacting with the interviewer; becomes incompletely aware when prodded strongly; can be aroused only by vigorous and repeated stimuli and as soon as the stimulus ceases, stuporous subject lapses back into unresponsive state<br>Coma: unarousable, unaware of all elements in the environment with no spontaneous interaction or awareness of the interviewer so that the interview is impossible even with maximal prodding |        |         |
| <b>Overall CAM-ICU Assessment (Features 1 and 2 and either Feature 3 or 4): Yes___ No___</b>                                                                                                                                                                                                                                                                                                                                                                                                                                                                                                                                                                                                                                                                                                                                                                                                                                                                                                           |        |         |

\*The scores included in the 10-point RASS range from a high of 4 (combative) to a low of -5 (deeply comatose and unresponsive). Under the RASS system, patients who were spontaneously alert, calm, and not agitated were scored at 0 (neutral zone). Anxious or agitated patients received a range of scores depending on their level of anxiety: 1 for anxious, 2 for agitated (fighting ventilator), 3 for very agitated (pulling on or removing catheters), or 4 for combative (violent and a danger to staff). The scores -1 to -5 were assigned for patients with varying degrees of sedation based on their ability to maintain eye contact: -1 for more than 10 seconds, -2 for less than 10 seconds, and -3 for eye opening but no eye contact. If physical stimulation was required, then the patients were scored as either -4 for eye opening or movement with physical or painful stimulation or -5 for no response to physical or painful stimulation. The RASS has excellent interrater reliability and intraclass correlation coefficients of 0.95 and 0.97, respectively, and has been validated against visual analog scale and geropsychiatric diagnoses in 2 ICU studies.<sup>37,38</sup>

†In completing the visual ASE, the patients were shown 5 simple pictures (previously published<sup>39</sup>) at 3-second intervals and asked to remember them. They were then immediately shown 10 subsequent pictures and asked to nod "yes" or "no" to indicate whether they had or had not just seen each of the pictures. Since 5 pictures had been shown to them already, for which the correct response was to nod "yes," and 5 others were new, for which the correct response was to shake their heads "no," patients scored perfectly if they achieved 10 correct responses. Scoring accounted for either errors of omission (indicating "no" for a previously shown picture) or for errors of commission (indicating "yes" for a picture not previously shown). In completing the auditory ASE, patients were asked to squeeze the rater's hand whenever they heard the letter A during the recitation of a series of 10 letters. The rater then read 10 letters from the following list in a normal tone at a rate of 1 letter per second: S, A, H, E, V, A, A, R, A, T. A scoring method similar to that of the visual ASE was used for the auditory ASE testing.

This table may be reproduced without permission for clinical use only (Ely EW et al. *JAMA*. 2001;286:2707-2710).

## Appendix 5: Telephone Survey



---

We would like to ask you (the PATIENT) some questions about your (the PATIENT'S) health:

- In general, how would you say your health is now?
  - Excellent
  - Very good
  - Good
  - Fair
  - Poor
  
- Sometimes it is necessary to spend most of the day in bed. Is this true for you now?
  - Yes
  - No
  - Don't know
  
- Have you fallen since discharge/since the last time our team talked with you by phone?
  - Yes
  - No
  - Don't know
  
- If you have fallen since discharge/since the last time our team talked with you by phone, did you see a doctor or go to an emergency department to get checked out after the fall?
  - Yes
  - No
  - Don't know
  
- Have you been admitted to a hospital since your hospital discharge/the last time our team spoke with you by phone?
  - Yes
  - No
  - Don't know
  
- Since discharge or the last time our team spoke with you, have you spent any time living in a nursing home, group home/assisted living facility, or rehabilitation facility?
  - Yes
  - No
  - Don't know

- 
- Did (you/PATIENT) need help washing or bathing (yourself/HIMSELF/HERSELF)?

Yes  
 No  
 Don't know

- Do you need help dressing and undressing?

Yes  
 No  
 Don't know

- Do you need help eating, including cutting food?

Yes  
 No  
 Don't know

- Do you need help getting in and out of the bed and a chair?

Yes  
 No  
 Don't know

- Do you need help cleaning yourself for either bowel or bladder functions?

Yes  
 No  
 Don't know

- Do you sometimes have an accident with your bowels either during the day or night?

Yes  
 No  
 Don't know

- Do you sometimes wet yourself either during the day or night?

Yes  
 No  
 Don't know

**Do you do the following on your own (NO HELP), with some help, or are you unable to:**

---

- Use the telephone, including looking up and dialing numbers, and answering the phone?

- On own/no help
- Some help
- Unable to do this
- Don't know

- Get to places out of walking distance by using public transportation or driving your car?

- On own/no help
- Some help
- Unable to do this
- Don't know

- Shop for groceries or clothes?

- On own/no help
- Some help
- Unable to do this
- Don't know

- Prepare, serve and provide meals for yourself?

- On own/no help
- Some help
- Unable to do this
- Don't know

- Do light housework, such as dusting or doing dishes?

- On own/no help
- Some help
- Unable to do this
- Don't know

- Take pills or medicines in the correct amounts and at the correct times?

- On own/no help
- Some help
- Unable to do this
- Don't know

- Handle your own money, including writing checks and paying bills?

- 
- On own/no help
  - Some help
  - Unable to do this
  - Don't know

- Do your laundry?
  - On own/no help
  - Some help
  - Unable to do this
  - Don't know

- Walk across the room either on your own or with a cane or walker?
  - On own/no help
  - Some help
  - Unable to do this
  - Don't know

The following questions are about your living situation.

- Where do you currently live?
  - Your (the PATIENT'S) own apartment or house
  - A relative or friend's apartment or house
  - A nursing home, group home/assisted living facility, or long-term care facility
  - A homeless shelter
  - Other\_\_\_\_\_
  
- How many people live with you (the PATIENT)? \_\_\_\_\_
  
- What is your current weight? \_\_\_\_\_
  
- If you (the PATIENT) need extra help when you get home from the hospital, is there someone who can help you (the PATIENT)?
  - No
  - Yes

---

If "Yes", what is this person's relationship to you (the PATIENT)?

|                   |   |                               |    |
|-------------------|---|-------------------------------|----|
| Spouse            | 1 | Neighbor or landlord          | 7  |
| Other partner     | 2 | Other friend                  | 8  |
| Child             | 3 | Floor nurse                   | 9  |
| Parent            | 4 | Visiting nurse                | 10 |
| Brother or sister | 5 | Home attendant or health aide | 11 |
| Other relative    | 6 | Some other person             | 12 |
| (specify)         |   | (specify)                     |    |

- What does this person do during the day if he/she is not helping you (the PATIENT)?
  - Work outside the home without pay
  - Work outside the home for pay
  - Work in the home without pay
  - Work in the home for pay
  - Other (specify) \_\_\_\_\_
  
- How old is this person?
  - Under 18
  - 18-49
  - 50-64
  - 65-74
  - 75-84
  - 85-89
  - 90 or greater

---

## PROTOCOL AMENDMENT 2

**Title:** Noninvasive Ventilation in Patients with Respiratory Failure: A Comparison of Face mask versus Helmet interface

**Date:** April 11, 2013

### Principle Investigators:

- Bhakti Patel, MD. Fellow, Section of Pulmonary and Critical Care Medicine
- Margaret Davis Hovda, MD Fellow, Section of Pulmonary and Critical Care Medicine
- Jared Greenberg, MD, Fellow, Section of Pulmonary and Critical Care Medicine
- Shruti B. Patel, MD Fellow, Section of Pulmonary and Critical Care Medicine
- John P. Kress, MD. Professor, Section of Pulmonary and Critical Care Medicine
- Anne Pohlman, APN-CNS, Coordinator Clinical Research
- Jesse B. Hall, MD. Professor, Section of Pulmonary and Critical Care Medicine

### Background:

Respiratory failure characterized by acute deterioration of gas exchange is often treated with endotracheal intubation and mechanical ventilation (figure 1). Similarly, the classic teaching in the treatment of patients with shock required intubation to “take away the work of breathing.” Although, the institution of mechanical ventilation is considered life saving, the associated complications of tracheal stenosis,<sup>xxii</sup> ventilator associated pneumonia,<sup>xxii</sup> barotrauma<sup>xxii</sup>, and neuromuscular weakness<sup>xxii</sup> are not without considerable morbidity and mortality.

Over the past years non-invasive ventilation delivered by facemask (figure 2) has become an attractive option to improve gas exchange without an artificial airway, thus preserving airway defense mechanisms, speech and swallow capabilities, and allowing interaction between patients and care providers while avoiding the complications of endotracheal intubation. This strategy of non-invasive ventilation has demonstrated significant mortality benefit in patients with hypercapnic respiratory failure from COPD,<sup>xxii,xxii</sup> acute cardiogenic pulmonary edema,<sup>xxii,xxii</sup> and hypoxemic respiratory failure in immunocompromised patients.<sup>xxii,xxii</sup> In addition to successfully avoiding endotracheal intubation, non-invasive ventilation has been used to successfully liberate patients from mechanical ventilation via an endotracheal tube to extubation and transition to non-invasive mechanical ventilation. As such non-invasive ventilation has been a standard therapy for certain types of respiratory failure for more than 15 years.

Despite the advantages of non-invasive ventilation, up to forty percent of patients fail facemask trials in part because of mask intolerance and severity of disease.<sup>xxii</sup> Some common complications contributing to mask intolerance include claustrophobia, nasal bridge skin necrosis, acneiform rash, and conjunctivitis and if present prompt premature

---

discontinuation of non-invasive ventilation and endotracheal intubation. Further limitation to facemask non-invasive ventilation is that the seal integrity is lost when higher pressures are required. For example, non-invasive ventilation via a nasal or full face mask typically begins to demonstrate leaks when the pressures required exceed 15-20 cm H<sub>2</sub>O. Unfortunately, certain types of respiratory failure such as that due to hypoxemia or shock may require such higher pressures. In an attempt to improve patient tolerability and deliver higher pressures, a transparent helmet has been proposed as a novel interface for non-invasive ventilation. The helmet is made of transparent latex-free PVC with a soft collar that adheres to the neck ensuring a seal when inflated (figure 3). It encloses the entire head and neck of the patient and is secured by two armpit braces. The design of the helmet confers some important advantages: 1) the transparency allows the patient to interact with the environment; 2) the lack of contact to the face lowers the risk of skin necrosis; 3) the helmet avoids problems of leaking with higher airway pressures that are seen with the face mask. Accordingly, it can be used to deliver airway pressures up to 40 cm H<sub>2</sub>O without leaking. Such higher pressures are more often needed to provide effective mechanical ventilation to patients with hypoxemic respiratory failure and/or shock; 4) it can be applied to any patient regardless of facial contour.<sup>xxii</sup>

The helmet interface has been compared to face mask in small case control studies for the treatment of hypoxemic respiratory failure (AHRF). While both interfaces have similar improvement of oxygenation, intubation rates, and mortality, the helmet had good tolerability that allowed for longer continuous application of noninvasive ventilation and in some cases sustained improvement of gas exchange even after discontinuation of therapy in immunocompromised patients,<sup>xxii,xxiii</sup> non-cardiogenic acute hypoxemic respiratory failure,<sup>xxii</sup> and acute cardiogenic pulmonary edema<sup>xxii</sup>. Given this initial experience and success with helmet ventilation, larger randomized studies comparing this intervention to face mask in patients with AHRF and shock need to be done to understand the potential benefits of helmet ventilation.

**Purpose:**

The objective of our study is to evaluate the efficacy of helmet ventilation as compared with face mask ventilation in patients with acute hypoxemic respiratory failure and evidence of shock, specifically assessing improvement of oxygenation, need for mechanical ventilation, and rates of ICU complications.

**Hypothesis:**

Noninvasive positive pressure ventilation delivered by helmet will improve oxygenation and/or ventilation and avoid the need for endotracheal intubation in more patients with respiratory failure than noninvasive ventilation via face mask. This may result in improved outcomes with decreased rates of ICU related complications.

**Methods:***Study Design*

---

We propose a single center randomized controlled trial studying the efficacy of noninvasive ventilation delivered via helmet in patients with respiratory failure (hypoxemic, ventilatory, or failure due to shock). All patients admitted to the adult medical intensive care unit at the University of Chicago will be screened for eligibility.

### *Subject Inclusion*

Patients aged  $\geq 18$  years of age who require noninvasive mechanical ventilation via facemask for  $\geq 8$  hours for the management of respiratory failure including:

1. hypoxemic failure due to cardiac pulmonary edema and non-cardiogenic acute hypoxemic respiratory failure (AHRF) and/or
2. shock and/or
3. Ventilatory failure due to Chronic obstructive Pulmonary disease (COPD)/Asthma,

will be eligible for enrollment. Additional inclusion criteria include:

- Intact airway protective gag reflex
- Able to follow instructions (e.g. squeeze hand on command, eye contact with care provider, stick out tongue on command)

Acute hypoxemic respiratory failure will be defined as moderate to severe dyspnea, pulmonary infiltrates, and PaO<sub>2</sub>/FIO<sub>2</sub> ratio less than 300.

Shock will be defined as mean arterial pressure was less than 70 mm Hg or the systolic blood pressure was less than 100 mm Hg despite administration of intravenous fluids (at least 1000 ml of crystalloids or 500 ml of colloids, unless there was an elevation in the central venous pressure to  $>12$  mm Hg or in pulmonary-artery occlusion pressure to  $>14$  mm Hg) and if there were signs of tissue hypoperfusion (e.g., altered mental state, mottled skin, urine output of  $<0.5$  ml per kilogram of body weight for 1 hour, or a serum lactate level of  $>2$  mmol per liter)<sup>xxii</sup>.

### *Subject exclusion*

The criteria for exclusion include:

- Cardiopulmonary arrest
- Glasgow coma scale  $<8$
- Absence of airway protective gag reflex
- Elevated intracranial pressure
- Tracheostomy
- Upper airway obstruction
- Pregnancy.
- Patients who refuse to undergo endotracheal intubation, whatever the initial therapeutic approach

### *Helmet group*

Patients randomized to the intervention group will switch from noninvasive ventilation delivered via facemask to a latex-free helmet connected to the ventilator by conventional



---

tubing. The helmet contains the head and the neck of the patient, has a rigid ring and is secured by two armpit braces; a soft collar adheres to the neck and ensures a sealed connection once the helmet is inflated. The rigid ring has an opening for the passage of nasogastric tube (if needed).

Patients randomized to helmet ventilation will have the helmet applied and connected to a ventilator. The ventilator delivers pressure through the helmet inlet tubing and exhaled breaths are released through the helmet outlet tubing. The positive end-expiratory pressure (PEEP) will be increased in increments of 2-3 cmH<sub>2</sub>O to improve peripheral oxygen saturation of at least 90% at an inspired oxygen requirement (FiO<sub>2</sub>) of ≤ 60%. Pressure support will be increased in increments of 2-3cmH<sub>2</sub>O to obtain respiratory rate <25 breaths/min and disappearance of accessory muscle activity. After application of the helmet, arterial blood gas sampling will be utilized to follow gas-exchange; this is a part of usual care for the management of patients with acute hypoxemic respiratory failure and/or shock. Noninvasive support will be reduced progressively in accordance to clinical improvement and will be discontinued if patient maintains respiratory rate <30breaths/min and PaO<sub>2</sub> >75mm Hg with FiO<sub>2</sub> 0.5 without ventilatory support. If endotracheal intubation is required, the helmet will be removed and the patient will be intubated without delay.

#### *Control Group*

Patients assigned to the control group will continue to wear face mask for delivery of noninvasive ventilation. The expiratory positive airway pressure will be titrated in 2-3cm H<sub>2</sub>O increments to achieve oxygen saturation of 90% at lowest possible FiO<sub>2</sub> (goal FiO<sub>2</sub> 0.6 or less). The inspiratory positive airway pressure will be titrated as well to decrease tachypnea (<25 breaths/min) and improve work of breathing. Blood gas analysis will be obtained to determine appropriate gas exchange.

Predetermined criteria for intubation for both groups will include:

- Inability to achieve an arterial oxygen saturation by pulse oximetry or arterial blood gas ≥ 88%
- Respiratory rate > 36 breaths/min
- Loss of ability to maintain ventilation to keep arterial blood pH ≥ 7.20
- Loss of protective airway gag reflex (seizure disorder, severe encephalopathy, Glasgow Coma Scale <8)
- Respiratory or cardiac arrest
- Intolerance of the helmet or face mask
- Development of airway bleeding, persistent vomiting, and development of copious tracheal secretions.

Patients who require endotracheal intubation will have initial ventilator settings of assist-control mode with delivery of tidal volumes of 6-8mL/kg of ideal body weight, and titration of PEEP to achieve oxygen saturation of 90% at lowest possible FiO<sub>2</sub> (goal FiO<sub>2</sub> 0.6 or less). Daily interruption of sedation, awakening and breathing trials will be performed per primary team.

---

If an enrolled patient is randomized to helmet noninvasive ventilation after intubation, they will undergo interruption of sedation and extubation with immediate placement of the helmet and initiation on noninvasive ventilation. Early initiation of noninvasive ventilation in patients who do not meet start criteria for extubation to facilitate early extubation has been associated with decreased mortality, ventilator associated pneumonia, and ventilator days.<sup>xxii</sup>

### **Data Collection:**

All study patients during hospitalization will have:

2. General Data collection:

- Demographic information, including medical history number, age, race, gender
- Details of current illness, including diagnosis, interventions, radiology imaging, laboratory results. Severity of illness scoring will occur (APACHE II – see Appendix 1) as well as daily serial organ function assessments (see Appendix 2).
- Baseline medical/surgical/functional status history
- Dates of mechanical ventilation, ICU and hospital length of stay
- Discharge Location

4. Daily Data Collection

- Daily mental status evaluations, including the Richmond-Agitation-Sedation Scale (Appendix 3) and the Confusion Assessment Method (Appendix 4)
- Muscular strength testing by physical therapists on ICU admission, ICU discharge and hospital discharge

5. All patients after discharge

- Telephone interviews at 1, 3, 6, and 12 months after discharge (Appendix 7)
  - Lasting approximately 5 minutes in duration
  - Assessing self-reported performance of ADL's
  - Reviewing need for medical care, including re-hospitalization, rehabilitation, physician outpatient visits
  - Current weight and nutritional status

### **Endpoints:**

#### *Primary*

- Percentage of patients requiring endotracheal intubation
- Duration of mechanical ventilation
  - Noninvasive ventilation via face mask or helmet
  - Invasive mechanical ventilation via endotracheal tube
- ICU length of stay
- Hospital Mortality

- 
- Improvement of oxygenation (defined as PaO<sub>2</sub>/FiO<sub>2</sub> ≥ 200 or increase from baseline by 100)

### *Secondary*

- ICU complications
  - Ventilator associated pneumonia
  - Barotrauma
  - Gastrointestinal hemorrhage
  - Pulmonary embolism
  - Sacral Decubitus ulcer
  - Delirium
  - ICU acquired weakness
- Hospital length of stay
- Readmission to intensive care unit
- Discharge location (home, skilled nursing facility, nursing home, rehabilitation)

### **Risks and Benefits**

The risks of this study are limited beyond those experienced during routine critical care of an intubated, mechanically ventilated patient.

- Non-invasive mechanical ventilation may be associated with failure to stabilize respiratory gas exchange. In this case, patients will be intubated and mechanically ventilated via the endotracheal tube.
- Non-invasive mechanical ventilation may be associated with failure to stabilize circulatory shock. In this case, patients will be intubated and mechanically ventilated via the endotracheal tube.
- Non-invasive mechanical ventilation may be associated with aspiration. Accordingly, only patients with an intact airway protective gag reflex will be eligible for enrollment. Aspiration is also known to occur in patients who have an endotracheal tube. Care will be taken to monitor all patients in this study for this occurrence.

---

Figure 1: Endotracheal Tube

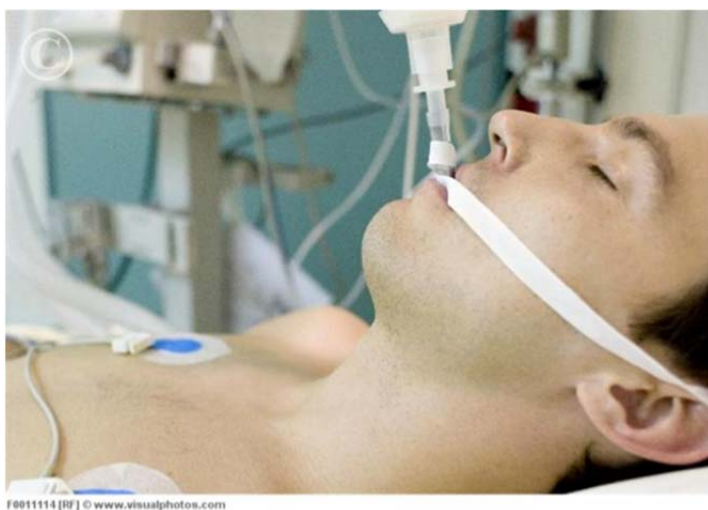

Figure 2: Facemask

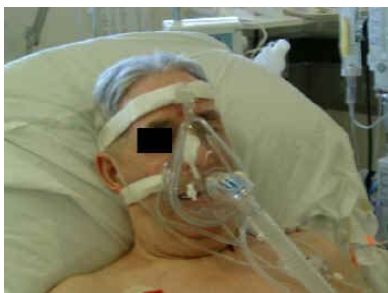

Figure 3: Helmet



**Appendix 1: ACUTE PHYSIOLOGY AND CHRONIC HEALTH EVALUATION  
(APACHE) II SCORING SYSTEM<sup>xxii</sup>**

|                                                                                                                                                                                                                                                                                                                                                                                                                                                                                                                                                                                                                                                                                                                                                        |                                                                  | + 4                                                                                                                                                                                                                                                                                                                                                                                                                                                                                                                                                                                                                                                                                                                                                                                                                                                                                                                                                                                                                                                                                                                                                                                                                                                                                                                                                                                                                                                                                                                                                                                                                                       | + 3                        | + 2      | + 1       | 0         | + 1       | + 2       | + 3     | + 4    | MINIMUM | MAXIMUM | SCORE |                         |                                                                  |                                                      |              |            |                                                                                   |                             |                         |                         |                                  |                                       |                            |                          |                              |                                 |                            |                      |                                  |  |                      |  |                      |  |                      |  |  |  |
|--------------------------------------------------------------------------------------------------------------------------------------------------------------------------------------------------------------------------------------------------------------------------------------------------------------------------------------------------------------------------------------------------------------------------------------------------------------------------------------------------------------------------------------------------------------------------------------------------------------------------------------------------------------------------------------------------------------------------------------------------------|------------------------------------------------------------------|-------------------------------------------------------------------------------------------------------------------------------------------------------------------------------------------------------------------------------------------------------------------------------------------------------------------------------------------------------------------------------------------------------------------------------------------------------------------------------------------------------------------------------------------------------------------------------------------------------------------------------------------------------------------------------------------------------------------------------------------------------------------------------------------------------------------------------------------------------------------------------------------------------------------------------------------------------------------------------------------------------------------------------------------------------------------------------------------------------------------------------------------------------------------------------------------------------------------------------------------------------------------------------------------------------------------------------------------------------------------------------------------------------------------------------------------------------------------------------------------------------------------------------------------------------------------------------------------------------------------------------------------|----------------------------|----------|-----------|-----------|-----------|-----------|---------|--------|---------|---------|-------|-------------------------|------------------------------------------------------------------|------------------------------------------------------|--------------|------------|-----------------------------------------------------------------------------------|-----------------------------|-------------------------|-------------------------|----------------------------------|---------------------------------------|----------------------------|--------------------------|------------------------------|---------------------------------|----------------------------|----------------------|----------------------------------|--|----------------------|--|----------------------|--|----------------------|--|--|--|
| PHYSIOLOGY                                                                                                                                                                                                                                                                                                                                                                                                                                                                                                                                                                                                                                                                                                                                             | VITAL SIGNS                                                      | temp °C                                                                                                                                                                                                                                                                                                                                                                                                                                                                                                                                                                                                                                                                                                                                                                                                                                                                                                                                                                                                                                                                                                                                                                                                                                                                                                                                                                                                                                                                                                                                                                                                                                   | ≥ 41                       | 39-40.9  | 38.5-38.9 | 36-38.4   | 34-35.9   | 32-33.9   | 30-31.9 | ≤ 29.9 |         |         |       |                         |                                                                  |                                                      |              |            |                                                                                   |                             |                         |                         |                                  |                                       |                            |                          |                              |                                 |                            |                      |                                  |  |                      |  |                      |  |                      |  |  |  |
|                                                                                                                                                                                                                                                                                                                                                                                                                                                                                                                                                                                                                                                                                                                                                        |                                                                  | BPs/d                                                                                                                                                                                                                                                                                                                                                                                                                                                                                                                                                                                                                                                                                                                                                                                                                                                                                                                                                                                                                                                                                                                                                                                                                                                                                                                                                                                                                                                                                                                                                                                                                                     |                            |          |           |           |           |           |         |        |         |         |       |                         |                                                                  |                                                      |              |            |                                                                                   |                             |                         |                         |                                  |                                       |                            |                          |                              |                                 |                            |                      |                                  |  |                      |  |                      |  |                      |  |  |  |
|                                                                                                                                                                                                                                                                                                                                                                                                                                                                                                                                                                                                                                                                                                                                                        |                                                                  | mean                                                                                                                                                                                                                                                                                                                                                                                                                                                                                                                                                                                                                                                                                                                                                                                                                                                                                                                                                                                                                                                                                                                                                                                                                                                                                                                                                                                                                                                                                                                                                                                                                                      | ≥ 160                      | 130-159  | 110-129   | 70-109    | 50-69     | ≤ 49      |         |        |         |         |       |                         |                                                                  |                                                      |              |            |                                                                                   |                             |                         |                         |                                  |                                       |                            |                          |                              |                                 |                            |                      |                                  |  |                      |  |                      |  |                      |  |  |  |
|                                                                                                                                                                                                                                                                                                                                                                                                                                                                                                                                                                                                                                                                                                                                                        |                                                                  | HR(vent)                                                                                                                                                                                                                                                                                                                                                                                                                                                                                                                                                                                                                                                                                                                                                                                                                                                                                                                                                                                                                                                                                                                                                                                                                                                                                                                                                                                                                                                                                                                                                                                                                                  | ≥ 180                      | 140-179  | 110-139   | 70-109    | 55-69     | 40-54     | ≤ 39    |        |         |         |       |                         |                                                                  |                                                      |              |            |                                                                                   |                             |                         |                         |                                  |                                       |                            |                          |                              |                                 |                            |                      |                                  |  |                      |  |                      |  |                      |  |  |  |
|                                                                                                                                                                                                                                                                                                                                                                                                                                                                                                                                                                                                                                                                                                                                                        |                                                                  | RR(otal)                                                                                                                                                                                                                                                                                                                                                                                                                                                                                                                                                                                                                                                                                                                                                                                                                                                                                                                                                                                                                                                                                                                                                                                                                                                                                                                                                                                                                                                                                                                                                                                                                                  | ≥ 50                       | 35-49    | 25-34     | 12-24     | 10-11     | 6-9       | ≤ 5     |        |         |         |       |                         |                                                                  |                                                      |              |            |                                                                                   |                             |                         |                         |                                  |                                       |                            |                          |                              |                                 |                            |                      |                                  |  |                      |  |                      |  |                      |  |  |  |
|                                                                                                                                                                                                                                                                                                                                                                                                                                                                                                                                                                                                                                                                                                                                                        | OXYGENATION                                                      | *ABC FiO <sub>2</sub>                                                                                                                                                                                                                                                                                                                                                                                                                                                                                                                                                                                                                                                                                                                                                                                                                                                                                                                                                                                                                                                                                                                                                                                                                                                                                                                                                                                                                                                                                                                                                                                                                     |                            |          |           |           |           |           |         |        |         |         |       |                         |                                                                  |                                                      |              |            |                                                                                   |                             |                         |                         |                                  |                                       |                            |                          |                              |                                 |                            |                      |                                  |  |                      |  |                      |  |                      |  |  |  |
|                                                                                                                                                                                                                                                                                                                                                                                                                                                                                                                                                                                                                                                                                                                                                        |                                                                  | PaO <sub>2</sub>                                                                                                                                                                                                                                                                                                                                                                                                                                                                                                                                                                                                                                                                                                                                                                                                                                                                                                                                                                                                                                                                                                                                                                                                                                                                                                                                                                                                                                                                                                                                                                                                                          |                            |          |           |           |           |           |         |        |         |         |       |                         |                                                                  |                                                      |              |            |                                                                                   |                             |                         |                         |                                  |                                       |                            |                          |                              |                                 |                            |                      |                                  |  |                      |  |                      |  |                      |  |  |  |
|                                                                                                                                                                                                                                                                                                                                                                                                                                                                                                                                                                                                                                                                                                                                                        |                                                                  | PaCO <sub>2</sub>                                                                                                                                                                                                                                                                                                                                                                                                                                                                                                                                                                                                                                                                                                                                                                                                                                                                                                                                                                                                                                                                                                                                                                                                                                                                                                                                                                                                                                                                                                                                                                                                                         |                            |          |           |           |           |           |         |        |         |         |       |                         |                                                                  |                                                      |              |            |                                                                                   |                             |                         |                         |                                  |                                       |                            |                          |                              |                                 |                            |                      |                                  |  |                      |  |                      |  |                      |  |  |  |
|                                                                                                                                                                                                                                                                                                                                                                                                                                                                                                                                                                                                                                                                                                                                                        |                                                                  | pH                                                                                                                                                                                                                                                                                                                                                                                                                                                                                                                                                                                                                                                                                                                                                                                                                                                                                                                                                                                                                                                                                                                                                                                                                                                                                                                                                                                                                                                                                                                                                                                                                                        | ≥ 7.7                      | 7.6-7.69 | 7.5-7.59  | 7.33-7.49 | 7.25-7.32 | 7.15-7.24 | < 7.15  |        |         |         |       |                         |                                                                  |                                                      |              |            |                                                                                   |                             |                         |                         |                                  |                                       |                            |                          |                              |                                 |                            |                      |                                  |  |                      |  |                      |  |                      |  |  |  |
|                                                                                                                                                                                                                                                                                                                                                                                                                                                                                                                                                                                                                                                                                                                                                        |                                                                  | AaDO <sub>2</sub>                                                                                                                                                                                                                                                                                                                                                                                                                                                                                                                                                                                                                                                                                                                                                                                                                                                                                                                                                                                                                                                                                                                                                                                                                                                                                                                                                                                                                                                                                                                                                                                                                         | ≥ 500                      | 350-499  | 200-349   | < 200     |           |           |         |        |         |         |       |                         |                                                                  |                                                      |              |            |                                                                                   |                             |                         |                         |                                  |                                       |                            |                          |                              |                                 |                            |                      |                                  |  |                      |  |                      |  |                      |  |  |  |
| LABS                                                                                                                                                                                                                                                                                                                                                                                                                                                                                                                                                                                                                                                                                                                                                   | serum CO <sub>2</sub>                                            | ≥ 52                                                                                                                                                                                                                                                                                                                                                                                                                                                                                                                                                                                                                                                                                                                                                                                                                                                                                                                                                                                                                                                                                                                                                                                                                                                                                                                                                                                                                                                                                                                                                                                                                                      | 41-51.9                    | 32-40.9  | 22-31.9   | 18-21.9   | 15-17.9   | < 15      |         |        |         |         |       |                         |                                                                  |                                                      |              |            |                                                                                   |                             |                         |                         |                                  |                                       |                            |                          |                              |                                 |                            |                      |                                  |  |                      |  |                      |  |                      |  |  |  |
|                                                                                                                                                                                                                                                                                                                                                                                                                                                                                                                                                                                                                                                                                                                                                        | Na+                                                              | ≥ 180                                                                                                                                                                                                                                                                                                                                                                                                                                                                                                                                                                                                                                                                                                                                                                                                                                                                                                                                                                                                                                                                                                                                                                                                                                                                                                                                                                                                                                                                                                                                                                                                                                     | 160-179                    | 155-159  | 150-154   | 130-149   | 120-129   | 111-119   | ≤ 110   |        |         |         |       |                         |                                                                  |                                                      |              |            |                                                                                   |                             |                         |                         |                                  |                                       |                            |                          |                              |                                 |                            |                      |                                  |  |                      |  |                      |  |                      |  |  |  |
|                                                                                                                                                                                                                                                                                                                                                                                                                                                                                                                                                                                                                                                                                                                                                        | K+                                                               | ≥ 7                                                                                                                                                                                                                                                                                                                                                                                                                                                                                                                                                                                                                                                                                                                                                                                                                                                                                                                                                                                                                                                                                                                                                                                                                                                                                                                                                                                                                                                                                                                                                                                                                                       | 6-6.9                      | 5.5-5.9  | 3.5-5.4   | 3-3.4     | 2.5-2.9   | < 2.5     |         |        |         |         |       |                         |                                                                  |                                                      |              |            |                                                                                   |                             |                         |                         |                                  |                                       |                            |                          |                              |                                 |                            |                      |                                  |  |                      |  |                      |  |                      |  |  |  |
|                                                                                                                                                                                                                                                                                                                                                                                                                                                                                                                                                                                                                                                                                                                                                        | **Creat                                                          | ≥ 3.5                                                                                                                                                                                                                                                                                                                                                                                                                                                                                                                                                                                                                                                                                                                                                                                                                                                                                                                                                                                                                                                                                                                                                                                                                                                                                                                                                                                                                                                                                                                                                                                                                                     | 2-3.4                      | 1.5-1.9  | 0.6-1.4   | < 0.8     |           |           |         |        |         |         |       |                         |                                                                  |                                                      |              |            |                                                                                   |                             |                         |                         |                                  |                                       |                            |                          |                              |                                 |                            |                      |                                  |  |                      |  |                      |  |                      |  |  |  |
|                                                                                                                                                                                                                                                                                                                                                                                                                                                                                                                                                                                                                                                                                                                                                        | Hct                                                              | ≥ 60                                                                                                                                                                                                                                                                                                                                                                                                                                                                                                                                                                                                                                                                                                                                                                                                                                                                                                                                                                                                                                                                                                                                                                                                                                                                                                                                                                                                                                                                                                                                                                                                                                      | 50-59.9                    | 46-49.9  | 30-45.9   | 20-29.9   | < 20      |           |         |        |         |         |       |                         |                                                                  |                                                      |              |            |                                                                                   |                             |                         |                         |                                  |                                       |                            |                          |                              |                                 |                            |                      |                                  |  |                      |  |                      |  |                      |  |  |  |
| WBC                                                                                                                                                                                                                                                                                                                                                                                                                                                                                                                                                                                                                                                                                                                                                    | ≥ 40                                                             | 20-39.9                                                                                                                                                                                                                                                                                                                                                                                                                                                                                                                                                                                                                                                                                                                                                                                                                                                                                                                                                                                                                                                                                                                                                                                                                                                                                                                                                                                                                                                                                                                                                                                                                                   | 15-19.9                    | 3-14.9   | 1-2.9     | < 1       |           |           |         |        |         |         |       |                         |                                                                  |                                                      |              |            |                                                                                   |                             |                         |                         |                                  |                                       |                            |                          |                              |                                 |                            |                      |                                  |  |                      |  |                      |  |                      |  |  |  |
| GLASGOW COMA                                                                                                                                                                                                                                                                                                                                                                                                                                                                                                                                                                                                                                                                                                                                           | APACHE                                                           | 0                                                                                                                                                                                                                                                                                                                                                                                                                                                                                                                                                                                                                                                                                                                                                                                                                                                                                                                                                                                                                                                                                                                                                                                                                                                                                                                                                                                                                                                                                                                                                                                                                                         | +1                         | +2       | +3        | +4        | +5        | +6        | +7      | +8     | +9      | +10     | +11   | +12                     | SCORE                                                            |                                                      |              |            |                                                                                   |                             |                         |                         |                                  |                                       |                            |                          |                              |                                 |                            |                      |                                  |  |                      |  |                      |  |                      |  |  |  |
|                                                                                                                                                                                                                                                                                                                                                                                                                                                                                                                                                                                                                                                                                                                                                        | GC SCORE                                                         | 15                                                                                                                                                                                                                                                                                                                                                                                                                                                                                                                                                                                                                                                                                                                                                                                                                                                                                                                                                                                                                                                                                                                                                                                                                                                                                                                                                                                                                                                                                                                                                                                                                                        | 14                         | 13       | 12        | 11        | 10        | 9         | 8       | 7      | 6       | 5       | 4     | 3                       |                                                                  |                                                      |              |            |                                                                                   |                             |                         |                         |                                  |                                       |                            |                          |                              |                                 |                            |                      |                                  |  |                      |  |                      |  |                      |  |  |  |
|                                                                                                                                                                                                                                                                                                                                                                                                                                                                                                                                                                                                                                                                                                                                                        | (Circle appropriate score for each category)                     | <table border="0" style="width: 100%; border-collapse: collapse;"> <tr> <td style="width: 25%;"></td> <td style="width: 25%; text-align: center;"><b>VERBAL NON-INTUBATED</b></td> <td style="width: 25%; text-align: center;"><b>VERBAL INTUBATED</b></td> <td style="width: 25%; text-align: center;"><b>MOTOR</b></td> </tr> <tr> <td style="text-align: center;"><b>EYE</b></td> <td style="text-align: center;"><b>4 SPONTANEOUS</b></td> <td style="text-align: center;"><b>5 ORIENTED AND TALKS</b></td> <td style="text-align: center;"><b>6 VERBAL COMMAND</b></td> </tr> <tr> <td style="text-align: center;"><b>3 VERBAL COMMAND</b></td> <td style="text-align: center;"><b>4 DISORIENTED &amp; TALKS</b></td> <td style="text-align: center;"><b>3 QUESTIONABLE ABILITY TO TALK</b></td> <td style="text-align: center;"><b>5 LOCALIZES TO PAIN</b></td> </tr> <tr> <td style="text-align: center;"><b>2 PAINFUL STIMULI</b></td> <td style="text-align: center;"><b>3 INAPPROPRIATE WORDS</b></td> <td style="text-align: center;"><b>1 GENERALLY UNRESPONSIVE</b></td> <td style="text-align: center;"><b>4 WITHDRAWS TO PAIN</b></td> </tr> <tr> <td style="text-align: center;"><b>1 NO RESPONSE</b></td> <td style="text-align: center;"><b>2 INCOMPREHENSIBLE SOUNDS</b></td> <td></td> <td style="text-align: center;"><b>3 DECORTICATE</b></td> </tr> <tr> <td></td> <td style="text-align: center;"><b>1 NO RESPONSE</b></td> <td></td> <td style="text-align: center;"><b>2 DECEREBRATE</b></td> </tr> <tr> <td></td> <td></td> <td></td> <td style="text-align: center;"><b>1 NO RESPONSE</b></td> </tr> </table> |                            |          |           |           |           |           |         |        |         |         |       |                         | <b>VERBAL NON-INTUBATED</b>                                      | <b>VERBAL INTUBATED</b>                              | <b>MOTOR</b> | <b>EYE</b> | <b>4 SPONTANEOUS</b>                                                              | <b>5 ORIENTED AND TALKS</b> | <b>6 VERBAL COMMAND</b> | <b>3 VERBAL COMMAND</b> | <b>4 DISORIENTED &amp; TALKS</b> | <b>3 QUESTIONABLE ABILITY TO TALK</b> | <b>5 LOCALIZES TO PAIN</b> | <b>2 PAINFUL STIMULI</b> | <b>3 INAPPROPRIATE WORDS</b> | <b>1 GENERALLY UNRESPONSIVE</b> | <b>4 WITHDRAWS TO PAIN</b> | <b>1 NO RESPONSE</b> | <b>2 INCOMPREHENSIBLE SOUNDS</b> |  | <b>3 DECORTICATE</b> |  | <b>1 NO RESPONSE</b> |  | <b>2 DECEREBRATE</b> |  |  |  |
|                                                                                                                                                                                                                                                                                                                                                                                                                                                                                                                                                                                                                                                                                                                                                        | <b>VERBAL NON-INTUBATED</b>                                      | <b>VERBAL INTUBATED</b>                                                                                                                                                                                                                                                                                                                                                                                                                                                                                                                                                                                                                                                                                                                                                                                                                                                                                                                                                                                                                                                                                                                                                                                                                                                                                                                                                                                                                                                                                                                                                                                                                   | <b>MOTOR</b>               |          |           |           |           |           |         |        |         |         |       |                         |                                                                  |                                                      |              |            |                                                                                   |                             |                         |                         |                                  |                                       |                            |                          |                              |                                 |                            |                      |                                  |  |                      |  |                      |  |                      |  |  |  |
| <b>EYE</b>                                                                                                                                                                                                                                                                                                                                                                                                                                                                                                                                                                                                                                                                                                                                             | <b>4 SPONTANEOUS</b>                                             | <b>5 ORIENTED AND TALKS</b>                                                                                                                                                                                                                                                                                                                                                                                                                                                                                                                                                                                                                                                                                                                                                                                                                                                                                                                                                                                                                                                                                                                                                                                                                                                                                                                                                                                                                                                                                                                                                                                                               | <b>6 VERBAL COMMAND</b>    |          |           |           |           |           |         |        |         |         |       |                         |                                                                  |                                                      |              |            |                                                                                   |                             |                         |                         |                                  |                                       |                            |                          |                              |                                 |                            |                      |                                  |  |                      |  |                      |  |                      |  |  |  |
| <b>3 VERBAL COMMAND</b>                                                                                                                                                                                                                                                                                                                                                                                                                                                                                                                                                                                                                                                                                                                                | <b>4 DISORIENTED &amp; TALKS</b>                                 | <b>3 QUESTIONABLE ABILITY TO TALK</b>                                                                                                                                                                                                                                                                                                                                                                                                                                                                                                                                                                                                                                                                                                                                                                                                                                                                                                                                                                                                                                                                                                                                                                                                                                                                                                                                                                                                                                                                                                                                                                                                     | <b>5 LOCALIZES TO PAIN</b> |          |           |           |           |           |         |        |         |         |       |                         |                                                                  |                                                      |              |            |                                                                                   |                             |                         |                         |                                  |                                       |                            |                          |                              |                                 |                            |                      |                                  |  |                      |  |                      |  |                      |  |  |  |
| <b>2 PAINFUL STIMULI</b>                                                                                                                                                                                                                                                                                                                                                                                                                                                                                                                                                                                                                                                                                                                               | <b>3 INAPPROPRIATE WORDS</b>                                     | <b>1 GENERALLY UNRESPONSIVE</b>                                                                                                                                                                                                                                                                                                                                                                                                                                                                                                                                                                                                                                                                                                                                                                                                                                                                                                                                                                                                                                                                                                                                                                                                                                                                                                                                                                                                                                                                                                                                                                                                           | <b>4 WITHDRAWS TO PAIN</b> |          |           |           |           |           |         |        |         |         |       |                         |                                                                  |                                                      |              |            |                                                                                   |                             |                         |                         |                                  |                                       |                            |                          |                              |                                 |                            |                      |                                  |  |                      |  |                      |  |                      |  |  |  |
| <b>1 NO RESPONSE</b>                                                                                                                                                                                                                                                                                                                                                                                                                                                                                                                                                                                                                                                                                                                                   | <b>2 INCOMPREHENSIBLE SOUNDS</b>                                 |                                                                                                                                                                                                                                                                                                                                                                                                                                                                                                                                                                                                                                                                                                                                                                                                                                                                                                                                                                                                                                                                                                                                                                                                                                                                                                                                                                                                                                                                                                                                                                                                                                           | <b>3 DECORTICATE</b>       |          |           |           |           |           |         |        |         |         |       |                         |                                                                  |                                                      |              |            |                                                                                   |                             |                         |                         |                                  |                                       |                            |                          |                              |                                 |                            |                      |                                  |  |                      |  |                      |  |                      |  |  |  |
|                                                                                                                                                                                                                                                                                                                                                                                                                                                                                                                                                                                                                                                                                                                                                        | <b>1 NO RESPONSE</b>                                             |                                                                                                                                                                                                                                                                                                                                                                                                                                                                                                                                                                                                                                                                                                                                                                                                                                                                                                                                                                                                                                                                                                                                                                                                                                                                                                                                                                                                                                                                                                                                                                                                                                           | <b>2 DECEREBRATE</b>       |          |           |           |           |           |         |        |         |         |       |                         |                                                                  |                                                      |              |            |                                                                                   |                             |                         |                         |                                  |                                       |                            |                          |                              |                                 |                            |                      |                                  |  |                      |  |                      |  |                      |  |  |  |
|                                                                                                                                                                                                                                                                                                                                                                                                                                                                                                                                                                                                                                                                                                                                                        |                                                                  |                                                                                                                                                                                                                                                                                                                                                                                                                                                                                                                                                                                                                                                                                                                                                                                                                                                                                                                                                                                                                                                                                                                                                                                                                                                                                                                                                                                                                                                                                                                                                                                                                                           | <b>1 NO RESPONSE</b>       |          |           |           |           |           |         |        |         |         |       |                         |                                                                  |                                                      |              |            |                                                                                   |                             |                         |                         |                                  |                                       |                            |                          |                              |                                 |                            |                      |                                  |  |                      |  |                      |  |                      |  |  |  |
| AGE & HEALTH                                                                                                                                                                                                                                                                                                                                                                                                                                                                                                                                                                                                                                                                                                                                           | AGE                                                              | 0                                                                                                                                                                                                                                                                                                                                                                                                                                                                                                                                                                                                                                                                                                                                                                                                                                                                                                                                                                                                                                                                                                                                                                                                                                                                                                                                                                                                                                                                                                                                                                                                                                         | +2                         | +3       | +5        | +6        |           |           |         |        |         |         |       | SCORE                   |                                                                  |                                                      |              |            |                                                                                   |                             |                         |                         |                                  |                                       |                            |                          |                              |                                 |                            |                      |                                  |  |                      |  |                      |  |                      |  |  |  |
|                                                                                                                                                                                                                                                                                                                                                                                                                                                                                                                                                                                                                                                                                                                                                        | Age Score                                                        | ≤ 44                                                                                                                                                                                                                                                                                                                                                                                                                                                                                                                                                                                                                                                                                                                                                                                                                                                                                                                                                                                                                                                                                                                                                                                                                                                                                                                                                                                                                                                                                                                                                                                                                                      | 45-54                      | 55-64    | 65-74     | ≥ 75      |           |           |         |        |         |         |       | SCORE                   |                                                                  |                                                      |              |            |                                                                                   |                             |                         |                         |                                  |                                       |                            |                          |                              |                                 |                            |                      |                                  |  |                      |  |                      |  |                      |  |  |  |
|                                                                                                                                                                                                                                                                                                                                                                                                                                                                                                                                                                                                                                                                                                                                                        | CH Score                                                         |                                                                                                                                                                                                                                                                                                                                                                                                                                                                                                                                                                                                                                                                                                                                                                                                                                                                                                                                                                                                                                                                                                                                                                                                                                                                                                                                                                                                                                                                                                                                                                                                                                           |                            |          |           |           |           |           |         |        |         |         |       |                         |                                                                  |                                                      |              |            |                                                                                   |                             |                         |                         |                                  |                                       |                            |                          |                              |                                 |                            |                      |                                  |  |                      |  |                      |  |                      |  |  |  |
|                                                                                                                                                                                                                                                                                                                                                                                                                                                                                                                                                                                                                                                                                                                                                        | CH Scale                                                         | +5                                                                                                                                                                                                                                                                                                                                                                                                                                                                                                                                                                                                                                                                                                                                                                                                                                                                                                                                                                                                                                                                                                                                                                                                                                                                                                                                                                                                                                                                                                                                                                                                                                        |                            |          |           |           |           | +2        |         |        |         |         |       |                         |                                                                  |                                                      |              |            |                                                                                   |                             |                         |                         |                                  |                                       |                            |                          |                              |                                 |                            |                      |                                  |  |                      |  |                      |  |                      |  |  |  |
| <b>NON-OP or EMERGENCY-OP</b>                                                                                                                                                                                                                                                                                                                                                                                                                                                                                                                                                                                                                                                                                                                          |                                                                  |                                                                                                                                                                                                                                                                                                                                                                                                                                                                                                                                                                                                                                                                                                                                                                                                                                                                                                                                                                                                                                                                                                                                                                                                                                                                                                                                                                                                                                                                                                                                                                                                                                           |                            |          |           |           |           |           |         |        |         |         |       | <b>ELECTIVE POST-OP</b> |                                                                  |                                                      |              |            |                                                                                   |                             |                         |                         |                                  |                                       |                            |                          |                              |                                 |                            |                      |                                  |  |                      |  |                      |  |                      |  |  |  |
| <b>WITH ANY 1 OF THE FOLLOWING CHRONIC CONDITIONS PRIOR TO THIS ILLNESS:</b>                                                                                                                                                                                                                                                                                                                                                                                                                                                                                                                                                                                                                                                                           |                                                                  |                                                                                                                                                                                                                                                                                                                                                                                                                                                                                                                                                                                                                                                                                                                                                                                                                                                                                                                                                                                                                                                                                                                                                                                                                                                                                                                                                                                                                                                                                                                                                                                                                                           |                            |          |           |           |           |           |         |        |         |         |       |                         |                                                                  |                                                      |              |            |                                                                                   |                             |                         |                         |                                  |                                       |                            |                          |                              |                                 |                            |                      |                                  |  |                      |  |                      |  |                      |  |  |  |
| <b>IF APPLIES, CIRCLE THE NUMBER CORRESPONDING TO THE CONDITION.</b>                                                                                                                                                                                                                                                                                                                                                                                                                                                                                                                                                                                                                                                                                   |                                                                  |                                                                                                                                                                                                                                                                                                                                                                                                                                                                                                                                                                                                                                                                                                                                                                                                                                                                                                                                                                                                                                                                                                                                                                                                                                                                                                                                                                                                                                                                                                                                                                                                                                           |                            |          |           |           |           |           |         |        |         |         |       |                         |                                                                  |                                                      |              |            |                                                                                   |                             |                         |                         |                                  |                                       |                            |                          |                              |                                 |                            |                      |                                  |  |                      |  |                      |  |                      |  |  |  |
| <table border="0" style="width: 100%; border-collapse: collapse;"> <tr> <td style="width: 33%; vertical-align: top;">1 LIVER -</td> <td style="width: 33%; vertical-align: top;">2 CVASC - CLASS IV ANGINA or AT REST or MIN SELF-CARE ACTIVITIES</td> <td style="width: 33%; vertical-align: top;">CIRRHOSIS WITH PORTAL HYPERTENSION or ENCEPHALOPATHY</td> </tr> <tr> <td style="vertical-align: top;">3 PULM -</td> <td style="vertical-align: top;">4 KIDNEY -</td> <td style="vertical-align: top;">CHRONIC HYPOX or HYPERCAP or POLYCYTHEMIA or PHT &gt;40 MMHG or RESPIRATOR DEPENDENT</td> </tr> <tr> <td style="vertical-align: top;">5 IMMUNE -</td> <td style="vertical-align: top;">IMMUNO COMPROMISED HOST</td> <td></td> </tr> </table> |                                                                  |                                                                                                                                                                                                                                                                                                                                                                                                                                                                                                                                                                                                                                                                                                                                                                                                                                                                                                                                                                                                                                                                                                                                                                                                                                                                                                                                                                                                                                                                                                                                                                                                                                           |                            |          |           |           |           |           |         |        |         |         |       | 1 LIVER -               | 2 CVASC - CLASS IV ANGINA or AT REST or MIN SELF-CARE ACTIVITIES | CIRRHOSIS WITH PORTAL HYPERTENSION or ENCEPHALOPATHY | 3 PULM -     | 4 KIDNEY - | CHRONIC HYPOX or HYPERCAP or POLYCYTHEMIA or PHT >40 MMHG or RESPIRATOR DEPENDENT | 5 IMMUNE -                  | IMMUNO COMPROMISED HOST |                         |                                  |                                       |                            |                          |                              |                                 |                            |                      |                                  |  |                      |  |                      |  |                      |  |  |  |
| 1 LIVER -                                                                                                                                                                                                                                                                                                                                                                                                                                                                                                                                                                                                                                                                                                                                              | 2 CVASC - CLASS IV ANGINA or AT REST or MIN SELF-CARE ACTIVITIES | CIRRHOSIS WITH PORTAL HYPERTENSION or ENCEPHALOPATHY                                                                                                                                                                                                                                                                                                                                                                                                                                                                                                                                                                                                                                                                                                                                                                                                                                                                                                                                                                                                                                                                                                                                                                                                                                                                                                                                                                                                                                                                                                                                                                                      |                            |          |           |           |           |           |         |        |         |         |       |                         |                                                                  |                                                      |              |            |                                                                                   |                             |                         |                         |                                  |                                       |                            |                          |                              |                                 |                            |                      |                                  |  |                      |  |                      |  |                      |  |  |  |
| 3 PULM -                                                                                                                                                                                                                                                                                                                                                                                                                                                                                                                                                                                                                                                                                                                                               | 4 KIDNEY -                                                       | CHRONIC HYPOX or HYPERCAP or POLYCYTHEMIA or PHT >40 MMHG or RESPIRATOR DEPENDENT                                                                                                                                                                                                                                                                                                                                                                                                                                                                                                                                                                                                                                                                                                                                                                                                                                                                                                                                                                                                                                                                                                                                                                                                                                                                                                                                                                                                                                                                                                                                                         |                            |          |           |           |           |           |         |        |         |         |       |                         |                                                                  |                                                      |              |            |                                                                                   |                             |                         |                         |                                  |                                       |                            |                          |                              |                                 |                            |                      |                                  |  |                      |  |                      |  |                      |  |  |  |
| 5 IMMUNE -                                                                                                                                                                                                                                                                                                                                                                                                                                                                                                                                                                                                                                                                                                                                             | IMMUNO COMPROMISED HOST                                          |                                                                                                                                                                                                                                                                                                                                                                                                                                                                                                                                                                                                                                                                                                                                                                                                                                                                                                                                                                                                                                                                                                                                                                                                                                                                                                                                                                                                                                                                                                                                                                                                                                           |                            |          |           |           |           |           |         |        |         |         |       |                         |                                                                  |                                                      |              |            |                                                                                   |                             |                         |                         |                                  |                                       |                            |                          |                              |                                 |                            |                      |                                  |  |                      |  |                      |  |                      |  |  |  |

\*IF NO ABG USE SERUM CO<sub>2</sub>

\*\*IF IN ARF DOUBLE THE CREATININE POINT SCORE

|                  |                             |  |
|------------------|-----------------------------|--|
| <b>APACHE II</b> | Physiology Points           |  |
|                  | Glasgow points              |  |
|                  | Chronic Health Points       |  |
|                  | Age Points                  |  |
|                  | <b>APACHE SCORE (TOTAL)</b> |  |

## Appendix 2: Serial Organ Function Assessment[18]<sup>xxii</sup>

| SOFA score                                                                              | 1            | 2                                        | 3                                       | 4              |
|-----------------------------------------------------------------------------------------|--------------|------------------------------------------|-----------------------------------------|----------------|
|                                                                                         |              |                                          | Respiration with respiratory support    |                |
| Respiration with respiratory support<br>PaO <sub>2</sub> /FiO <sub>2</sub> , mmHg       | < 400        | < 300                                    | < 200                                   | < 100          |
| Coagulation<br>Platelets x10 <sup>3</sup> /mm <sup>3</sup>                              | < 150        | < 100                                    | < 50                                    | < 20           |
| Liver<br>Bilirubin, mg/dl                                                               | 1.2-1.9      | 2-5.9                                    | 6-11.9                                  | > 12           |
| Cardiovascular<br>Hypotension<br>>15 or<br>(doses in ug/kg·min)<br>catecholamines > 0,1 | MAP < 70mmHg | Dopamine ≤ 5 or<br>Dobutamine (any dose) | Dopamine > 5 or<br>catecholamines ≤ 0.1 | Dopamine       |
| Neurologic<br>Glasgow Coma Score                                                        | 13-14        | 10-12                                    | 6-9                                     | < 6            |
| Renal<br>Creatinine mg/dl or<br>Urine output ml/zi                                      | 1.2-1.9      | 2-3.4                                    | 3.5-4.9<br>(200-500)                    | > 5<br>(< 200) |

### Appendix 3. Richmond agitation–sedation scale<sup>xxii</sup>

**TABLE 1. RICHMOND AGITATION–SEDATION SCALE**

| Score | Term              | Description                                                                                     |
|-------|-------------------|-------------------------------------------------------------------------------------------------|
| +4    | Combative         | Overtly combative or violent; immediate danger to staff                                         |
| +3    | Very agitation    | Pulls on or removes tube(s) or catheter(s) or has aggressive behavior toward staff              |
| +2    | Agitated          | Frequent nonpurposeful movement or patient–ventilator dyssynchrony                              |
| +1    | Restless          | Anxious or apprehensive but movements not aggressive or vigorous                                |
| 0     | Alert and calm    |                                                                                                 |
| –1    | Drowsy            | Not fully alert, but has sustained (more than 10 seconds) awakening, with eye contact, to voice |
| –2    | Light sedation    | Briefly (less than 10 seconds) awakens with eye contact to voice                                |
| –3    | Moderate sedation | Any movement (but no eye contact) to voice                                                      |
| –4    | Deep sedation     | No response to voice, but any movement to physical stimulation                                  |
| –5    | Unarousable       | No response to voice or physical stimulation                                                    |

**Procedure**

1. Observe patient. Is patient alert and calm (score 0)?  
Does patient have behavior that is consistent with restlessness or agitation (score +1 to +4 using the criteria listed above, under DESCRIPTION)?
2. If patient is not alert, in a loud speaking voice state patient's name and direct patient to open eyes and look at speaker. Repeat once if necessary. Can prompt patient to continue looking at speaker.  
Patient has eye opening and eye contact, which is sustained for more than 10 seconds (score –1).  
Patient has eye opening and eye contact, but this is not sustained for 10 seconds (score –2).  
Patient has any movement in response to voice, excluding eye contact (score –3).
3. If patient does not respond to voice, physically stimulate patient by shaking shoulder and then rubbing sternum if there is no response to shaking shoulder.  
Patient has any movement to physical stimulation (score –4).  
Patient has no response to voice or physical stimulation (score –5).

**APPENDIX 4: Confusion Assessment Method (CAM-ICU)<sup>xxii</sup>**



| Features and Descriptions                                                                                                                                                                                                                                                                                                                                                                                                                                                                                                                                                                                                                                                                                                                                                                                                                                                                                                                                                                              | Absent | Present |
|--------------------------------------------------------------------------------------------------------------------------------------------------------------------------------------------------------------------------------------------------------------------------------------------------------------------------------------------------------------------------------------------------------------------------------------------------------------------------------------------------------------------------------------------------------------------------------------------------------------------------------------------------------------------------------------------------------------------------------------------------------------------------------------------------------------------------------------------------------------------------------------------------------------------------------------------------------------------------------------------------------|--------|---------|
| <b>I. Acute onset or fluctuating course*</b>                                                                                                                                                                                                                                                                                                                                                                                                                                                                                                                                                                                                                                                                                                                                                                                                                                                                                                                                                           |        |         |
| A. Is there evidence of an acute change in mental status from the baseline?<br>B. Or, did the (abnormal) behavior fluctuate during the past 24 hours, that is, tend to come and go or increase and decrease in severity as evidenced by fluctuations on the Richmond Agitation Sedation Scale (RASS) or the Glasgow Coma Scale?                                                                                                                                                                                                                                                                                                                                                                                                                                                                                                                                                                                                                                                                        |        |         |
| <b>II. Inattention†</b>                                                                                                                                                                                                                                                                                                                                                                                                                                                                                                                                                                                                                                                                                                                                                                                                                                                                                                                                                                                |        |         |
| Did the patient have difficulty focusing attention as evidenced by a score of less than 8 correct answers on either the visual or auditory components of the Attention Screening Examination (ASE)?                                                                                                                                                                                                                                                                                                                                                                                                                                                                                                                                                                                                                                                                                                                                                                                                    |        |         |
| <b>III. Disorganized thinking</b>                                                                                                                                                                                                                                                                                                                                                                                                                                                                                                                                                                                                                                                                                                                                                                                                                                                                                                                                                                      |        |         |
| Is there evidence of disorganized or incoherent thinking as evidenced by incorrect answers to 3 or more of the 4 questions and inability to follow the commands?<br>Questions<br>1. Will a stone float on water?<br>2. Are there fish in the sea?<br>3. Does 1 pound weigh more than 2 pounds?<br>4. Can you use a hammer to pound a nail?<br>Commands<br>1. Are you having unclear thinking?<br>2. Hold up this many fingers. (Examiner holds 2 fingers in front of the patient.)<br>3. Now do the same thing with the other hand (without holding the 2 fingers in front of the patient).<br>(If the patient is already extubated from the ventilator, determine whether the patient's thinking is disorganized or incoherent, such as rambling or irrelevant conversation, unclear or illogical flow of ideas, or unpredictable switching from subject to subject.)                                                                                                                                 |        |         |
| <b>IV. Altered level of consciousness</b>                                                                                                                                                                                                                                                                                                                                                                                                                                                                                                                                                                                                                                                                                                                                                                                                                                                                                                                                                              |        |         |
| Is the patient's level of consciousness anything other than alert, such as being vigilant or lethargic or in a stupor, or coma?<br>Alert: spontaneously fully aware of environment and interacts appropriately<br>Vigilant: hyperalert<br>Lethargic: drowsy but easily aroused, unaware of some elements in the environment or not spontaneously interacting with the interviewer; becomes fully aware and appropriately interactive when prodded minimally<br>Stupor: difficult to arouse, unaware of some or all elements in the environment or not spontaneously interacting with the interviewer; becomes incompletely aware when prodded strongly; can be aroused only by vigorous and repeated stimuli and as soon as the stimulus ceases, stuporous subject lapses back into unresponsive state<br>Coma: unarousable, unaware of all elements in the environment with no spontaneous interaction or awareness of the interviewer so that the interview is impossible even with maximal prodding |        |         |
| <b>Overall CAM-ICU Assessment (Features 1 and 2 and either Feature 3 or 4): Yes___ No___</b>                                                                                                                                                                                                                                                                                                                                                                                                                                                                                                                                                                                                                                                                                                                                                                                                                                                                                                           |        |         |

\*The scores included in the 10-point RASS range from a high of 4 (combative) to a low of -5 (deeply comatose and unresponsive). Under the RASS system, patients who were spontaneously alert, calm, and not agitated were scored at 0 (neutral zone). Anxious or agitated patients received a range of scores depending on their level of anxiety: 1 for anxious, 2 for agitated (fighting ventilator), 3 for very agitated (pulling on or removing catheters), or 4 for combative (violent and a danger to staff). The scores -1 to -5 were assigned for patients with varying degrees of sedation based on their ability to maintain eye contact: -1 for more than 10 seconds, -2 for less than 10 seconds, and -3 for eye opening but no eye contact. If physical stimulation was required, then the patients were scored as either -4 for eye opening or movement with physical or painful stimulation or -5 for no response to physical or painful stimulation. The RASS has excellent interrater reliability and intraclass correlation coefficients of 0.95 and 0.97, respectively, and has been validated against visual analog scale and geropsychiatric diagnoses in 2 ICU studies.<sup>37,38</sup>

†In completing the visual ASE, the patients were shown 5 simple pictures (previously published<sup>39</sup>) at 3-second intervals and asked to remember them. They were then immediately shown 10 subsequent pictures and asked to nod "yes" or "no" to indicate whether they had or had not just seen each of the pictures. Since 5 pictures had been shown to them already, for which the correct response was to nod "yes," and 5 others were new, for which the correct response was to shake their heads "no," patients scored perfectly if they achieved 10 correct responses. Scoring accounted for either errors of omission (indicating "no" for a previously shown picture) or for errors of commission (indicating "yes" for a picture not previously shown). In completing the auditory ASE, patients were asked to squeeze the rater's hand whenever they heard the letter A during the recitation of a series of 10 letters. The rater then read 10 letters from the following list in a normal tone at a rate of 1 letter per second: S, A, H, E, V, A, A, R, A, T. A scoring method similar to that of the visual ASE was used for the auditory ASE testing.

This table may be reproduced without permission for clinical use only (Ely EW et al. *JAMA*. 2001;286:2707-2710).

## Appendix 5: Telephone Survey

---

We would like to ask you (the PATIENT) some questions about your (the PATIENT'S) health:

- In general, how would you say your health is now?
  - Excellent
  - Very good
  - Good
  - Fair
  - Poor
  
- Sometimes it is necessary to spend most of the day in bed. Is this true for you now?
  - Yes
  - No
  - Don't know
  
- Have you fallen since discharge/since the last time our team talked with you by phone?
  - Yes
  - No
  - Don't know
  
- If you have fallen since discharge/since the last time our team talked with you by phone, did you see a doctor or go to an emergency department to get checked out after the fall?
  - Yes
  - No
  - Don't know
  
- Have you been admitted to a hospital since your hospital discharge/the last time our team spoke with you by phone?
  - Yes
  - No
  - Don't know
  
- Since discharge or the last time our team spoke with you, have you spent any time living in a nursing home, group home/assisted living facility, or rehabilitation facility?
  - Yes
  - No
  - Don't know

- 
- Did (you/PATIENT) need help washing or bathing (yourself/HIMSELF/HERSELF)?

Yes  
 No  
 Don't know

- Do you need help dressing and undressing?

Yes  
 No  
 Don't know

- Do you need help eating, including cutting food?

Yes  
 No  
 Don't know

- Do you need help getting in and out of the bed and a chair?

Yes  
 No  
 Don't know

- Do you need help cleaning yourself for either bowel or bladder functions?

Yes  
 No  
 Don't know

- Do you sometimes have an accident with your bowels either during the day or night?

Yes  
 No  
 Don't know

- Do you sometimes wet yourself either during the day or night?

Yes  
 No  
 Don't know

**Do you do the following on your own (NO HELP), with some help, or are you unable to:**

---

- Use the telephone, including looking up and dialing numbers, and answering the phone?

- On own/no help
- Some help
- Unable to do this
- Don't know

- Get to places out of walking distance by using public transportation or driving your car?

- On own/no help
- Some help
- Unable to do this
- Don't know

- Shop for groceries or clothes?

- On own/no help
- Some help
- Unable to do this
- Don't know

- Prepare, serve and provide meals for yourself?

- On own/no help
- Some help
- Unable to do this
- Don't know

- Do light housework, such as dusting or doing dishes?

- On own/no help
- Some help
- Unable to do this
- Don't know

- Take pills or medicines in the correct amounts and at the correct times?

- On own/no help
- Some help
- Unable to do this
- Don't know

- Handle your own money, including writing checks and paying bills?

- 
- On own/no help
  - Some help
  - Unable to do this
  - Don't know

- Do your laundry?
  - On own/no help
  - Some help
  - Unable to do this
  - Don't know

- Walk across the room either on your own or with a cane or walker?
  - On own/no help
  - Some help
  - Unable to do this
  - Don't know

The following questions are about your living situation.

- Where do you currently live?
  - Your (the PATIENT'S) own apartment or house
  - A relative or friend's apartment or house
  - A nursing home, group home/assisted living facility, or long-term care facility
  - A homeless shelter
  - Other\_\_\_\_\_
  
- How many people live with you (the PATIENT)? \_\_\_\_\_
  
- What is your current weight? \_\_\_\_\_
  
- If you (the PATIENT) need extra help when you get home from the hospital, is there someone who can help you (the PATIENT)?
  - No
  - Yes

---

If "Yes", what is this person's relationship to you (the PATIENT)?

|                   |   |                               |    |
|-------------------|---|-------------------------------|----|
| Spouse            | 1 | Neighbor or landlord          | 7  |
| Other partner     | 2 | Other friend                  | 8  |
| Child             | 3 | Floor nurse                   | 9  |
| Parent            | 4 | Visiting nurse                | 10 |
| Brother or sister | 5 | Home attendant or health aide | 11 |
| Other relative    | 6 | Some other person             | 12 |
| (specify)         |   | (specify)                     |    |

- What does this person do during the day if he/she is not helping you (the PATIENT)?
  - Work outside the home without pay
  - Work outside the home for pay
  - Work in the home without pay
  - Work in the home for pay
  - Other (specify) \_\_\_\_\_
  
- How old is this person?
  - Under 18
  - 18-49
  - 50-64
  - 65-74
  - 75-84
  - 85-89
  - 90 or greater

**Title:** Noninvasive Ventilation in Patients with Respiratory Failure: A Comparison of Face mask versus Helmet interface

---

## PROTOCOL AMENDMENT 6

**Date:** April 28, 2015

### **Principle Investigators:**

- Bhakti Patel, MD. Fellow, Section of Pulmonary and Critical Care Medicine
- Margaret Davis Hovda, MD Fellow, Section of Pulmonary and Critical Care Medicine
- Jared Greenberg, MD, Fellow, Section of Pulmonary and Critical Care Medicine
- Shruti B. Patel, MD Fellow, Section of Pulmonary and Critical Care Medicine
- John P. Kress, MD. Professor, Section of Pulmonary and Critical Care Medicine
- Anne Pohlman, APN-CNS, Coordinator Clinical Research
- Jesse B. Hall, MD. Professor, Section of Pulmonary and Critical Care Medicine

### **Background:**

Respiratory failure characterized by acute deterioration of gas exchange is often treated with endotracheal intubation and mechanical ventilation (figure 1). Similarly, the classic teaching in the treatment of patients with shock required intubation to “take away the work of breathing.” Although, the institution of mechanical ventilation is considered life saving, the associated complications of tracheal stenosis,<sup>xxii</sup> ventilator associated pneumonia,<sup>xxii</sup> barotrauma<sup>xxii</sup>, and neuromuscular weakness<sup>xxii</sup> are not without considerable morbidity and mortality.

Over the past years non-invasive ventilation delivered by facemask (figure 2) has become an attractive option to improve gas exchange without an artificial airway, thus preserving airway defense mechanisms, speech and swallow capabilities, and allowing interaction between patients and care providers while avoiding the complications of endotracheal intubation. This strategy of non-invasive ventilation has demonstrated significant mortality benefit in patients with hypercapnic respiratory failure from COPD,<sup>xxii,xxii</sup> acute cardiogenic pulmonary edema,<sup>xxii,xxii</sup> and hypoxemic respiratory failure in immunocompromised patients.<sup>xxii,xxii</sup> In addition to successfully avoiding endotracheal intubation, non-invasive ventilation has been used to successfully liberate patients from mechanical ventilation via an endotracheal tube to extubation and transition to non-invasive mechanical ventilation. As such non-invasive ventilation has been a standard therapy for certain types of respiratory failure for more than 15 years.

Despite the advantages of non-invasive ventilation, up to forty percent of patients fail facemask trials in part because of mask intolerance and severity of disease.<sup>xxii</sup> Some common complications contributing to mask intolerance include claustrophobia, nasal bridge skin necrosis, acneiform rash, and conjunctivitis and if present prompt premature discontinuation of non-invasive ventilation and endotracheal intubation. Further limitation to facemask non-invasive ventilation is that the seal integrity is lost when higher pressures are required. For example, non-invasive ventilation via a nasal or full face mask typically begins to demonstrate leaks when the pressures required exceed 15-20 cm H<sub>2</sub>O. Unfortunately, certain types of respiratory failure such as that due to hypoxemia or shock

---

may require such higher pressures. In an attempt to improve patient tolerability and deliver higher pressures, a transparent helmet has been proposed as a novel interface for non-invasive ventilation. The helmet is made of transparent latex-free PVC with a soft collar that adheres to the neck ensuring a seal when inflated (figure 3). It encloses the entire head and neck of the patient and is secured by two armpit braces. The design of the helmet confers some important advantages: 1) the transparency allows the patient to interact with the environment; 2) the lack of contact to the face lowers the risk of skin necrosis; 3) the helmet avoids problems of leaking with higher airway pressures that are seen with the face mask. Accordingly, it can be used to deliver airway pressures up to 40 cm H<sub>2</sub>O without leaking. Such higher pressures are more often needed to provide effective mechanical ventilation to patients with hypoxemic respiratory failure and/or shock; 4) it can be applied to any patient regardless of facial contour.<sup>xxii</sup>

The helmet interface has been compared to face mask in small case control studies for the treatment of hypoxemic respiratory failure (AHRF). While both interfaces have similar improvement of oxygenation, intubation rates, and mortality, the helmet had good tolerability that allowed for longer continuous application of noninvasive ventilation and in some cases sustained improvement of gas exchange even after discontinuation of therapy in immunocompromised patients,<sup>xxii,xxiii</sup> non-cardiogenic acute hypoxemic respiratory failure,<sup>xxii</sup> and acute cardiogenic pulmonary edema<sup>xxii</sup>. Given this initial experience and success with helmet ventilation, larger randomized studies comparing this intervention to face mask in patients with AHRF and shock need to be done to understand the potential benefits of helmet ventilation.

**Purpose:**

The objective of our study is to evaluate the efficacy of helmet ventilation as compared with face mask ventilation in patients with acute hypoxemic respiratory failure and evidence of shock, specifically assessing improvement of oxygenation, need for mechanical ventilation, and rates of ICU complications.

**Hypothesis:**

Noninvasive positive pressure ventilation delivered by helmet will improve oxygenation and/or ventilation and avoid the need for endotracheal intubation in more patients with respiratory failure than noninvasive ventilation via face mask. This may result in improved outcomes with decreased rates of ICU related complications.

**Methods:***Study Design*

We propose a single center randomized controlled trial studying the efficacy of noninvasive ventilation delivered via helmet in patients with respiratory failure (hypoxemic, ventilatory, or failure due to shock). All patients admitted to the adult medical intensive care unit at the University of Chicago will be screened for eligibility.

*Subject Inclusion*



---

Patients aged  $\geq 18$  years of age who require noninvasive mechanical ventilation via facemask for  $\geq 8$  hours for the management of respiratory failure including:

4. hypoxemic failure due to cardiac pulmonary edema and non-cardiogenic acute hypoxemic respiratory failure (AHRF) and/or
5. shock and/or
6. Ventilatory failure due to Chronic obstructive Pulmonary disease (COPD)/Asthma,

will be eligible for enrollment. Additional inclusion criteria include:

- Intact airway protective gag reflex
- Able to follow instructions (e.g. squeeze hand on command, eye contact with care provider, stick out tongue on command)

Acute hypoxemic respiratory failure will be defined as moderate to severe dyspnea, pulmonary infiltrates, and PaO<sub>2</sub>/FIO<sub>2</sub> ratio less than 300.

Shock will be defined as mean arterial pressure was less than 70 mm Hg or the systolic blood pressure was less than 100 mm Hg despite administration of intravenous fluids (at least 1000 ml of crystalloids or 500 ml of colloids, unless there was an elevation in the central venous pressure to  $>12$  mm Hg or in pulmonary-artery occlusion pressure to  $>14$  mm Hg) and if there were signs of tissue hypoperfusion (e.g., altered mental state, mottled skin, urine output of  $<0.5$  ml per kilogram of body weight for 1 hour, or a serum lactate level of  $>2$  mmol per liter)<sup>xxii</sup>.

#### *Subject exclusion*

The criteria for exclusion include:

- Cardiopulmonary arrest
- Glasgow coma scale  $<8$
- Absence of airway protective gag reflex
- Elevated intracranial pressure
- Tracheostomy
- Upper airway obstruction
- Pregnancy.
- Patients who refuse to undergo endotracheal intubation, whatever the initial therapeutic approach

#### *Helmet group*

Patients randomized to the intervention group will switch from noninvasive ventilation delivered via facemask to a latex-free helmet connected to the ventilator by conventional tubing. The helmet contains the head and the neck of the patient, has a rigid ring and is secured by two armpit braces; a soft collar adheres to the neck and ensures a sealed connection once the helmet is inflated. The rigid ring has an opening for the passage of nasogastric tube (if needed).

---

Patients randomized to helmet ventilation will have the helmet applied and connected to a ventilator. The ventilator delivers pressure through the helmet inlet tubing and exhaled breaths are released through the helmet outlet tubing. The positive end-expiratory pressure (PEEP) will be increased in increments of 2-3 cmH<sub>2</sub>O to improve peripheral oxygen saturation of at least 90% at an inspired oxygen requirement (FiO<sub>2</sub>) of ≤ 60%. Pressure support will be increased in increments of 2-3cmH<sub>2</sub>O to obtain respiratory rate <25 breaths/min and disappearance of accessory muscle activity. After application of the helmet, arterial blood gas sampling will be utilized to follow gas-exchange; this is a part of usual care for the management of patients with acute hypoxemic respiratory failure and/or shock. Noninvasive support will be reduced progressively in accordance to clinical improvement and will be discontinued if patient maintains respiratory rate <30breaths/min and PaO<sub>2</sub> >75mm Hg with FiO<sub>2</sub> 0.5 without ventilatory support. If endotracheal intubation is required, the helmet will be removed and the patient will be intubated without delay.

### *Control Group*

Patients assigned to the control group will continue to wear face mask for delivery of noninvasive ventilation. The expiratory positive airway pressure will be titrated in 2-3cm H<sub>2</sub>O increments to achieve oxygen saturation of 90% at lowest possible FiO<sub>2</sub> (goal FiO<sub>2</sub> 0.6 or less). The inspiratory positive airway pressure will be titrated as well to decrease tachypnea (<25 breaths/min) and improve work of breathing. Blood gas analysis will be obtained to determine appropriate gas exchange.

Predetermined criteria for intubation for both groups will include:

- Inability to achieve an arterial oxygen saturation by pulse oximetry or arterial blood gas ≥ 88%
- Respiratory rate > 36 breaths/min
- Loss of ability to maintain ventilation to keep arterial blood pH ≥ 7.20
- Loss of protective airway gag reflex (seizure disorder, severe encephalopathy, Glasgow Coma Scale <8)
- Respiratory or cardiac arrest
- Intolerance of the helmet or face mask
- Development of airway bleeding, persistent vomiting, and development of copious tracheal secretions.

Patients who require endotracheal intubation will have initial ventilator settings of assist-control mode with delivery of tidal volumes of 6-8mL/kg of ideal body weight, and titration of PEEP to achieve oxygen saturation of 90% at lowest possible FiO<sub>2</sub> (goal FiO<sub>2</sub> 0.6 or less). Daily interruption of sedation, awakening and breathing trials will be performed per primary team.

If an enrolled patient is randomized to helmet noninvasive ventilation after intubation, they will undergo interruption of sedation and extubation with immediate placement of the helmet and initiation on noninvasive ventilation. Early initiation of noninvasive ventilation in patients who do not meet start criteria for extubation to facilitate early extubation has

---

been associated with decreased mortality, ventilator associated pneumonia, and ventilator days.<sup>xxii</sup>

### **Data Collection:**

All study patients during hospitalization will have:

#### 3. General Data collection:

- Demographic information, including medical history number, age, race, gender
- Details of current illness, including diagnosis, interventions, radiology imaging, laboratory results. Severity of illness scoring will occur (APACHE II – see Appendix 1) as well as daily serial organ function assessments (see Appendix 2).
- Baseline medical/surgical/functional status history
- Dates of mechanical ventilation, ICU and hospital length of stay
- Discharge Location

#### 6. Daily Data Collection

- Daily mental status evaluations, including the Richmond-Agitation-Sedation Scale (Appendix 3) and the Confusion Assessment Method (Appendix 4)
- Muscular strength testing by physical therapists on ICU admission, ICU discharge and hospital discharge

#### 7. All patients after discharge

- Telephone interviews at 1, 3, 6, and 12 months after discharge (Appendix 7)
  - Lasting approximately 5 minutes in duration
  - Assessing self-reported performance of ADL's
  - Reviewing need for medical care, including re-hospitalization, rehabilitation, physician outpatient visits
  - Current weight and nutritional status

### **Endpoints:**

#### *Primary*

- Percentage of patients requiring endotracheal intubation
- Duration of mechanical ventilation
  - Noninvasive ventilation via face mask or helmet
  - Invasive mechanical ventilation via endotracheal tube
- ICU length of stay
- Hospital Mortality
- Improvement of oxygenation (defined as PaO<sub>2</sub>/FiO<sub>2</sub> ≥ 200 or increase from baseline by 100)

#### *Secondary*

- ICU complications

- 
- Ventilator associated pneumonia
  - Barotrauma
  - Gastrointestinal hemorrhage
  - Pulmonary embolism
  - Sacral Decubitus ulcer
  - Delirium
  - ICU acquired weakness
  - Hospital length of stay
  - Readmission to intensive care unit
  - Discharge location (home, skilled nursing facility, nursing home, rehabilitation)

### **Risks and Benefits**

The risks of this study are limited beyond those experienced during routine critical care of an intubated, mechanically ventilated patient.

- Non-invasive mechanical ventilation may be associated with failure to stabilize respiratory gas exchange. In this case, patients will be intubated and mechanically ventilated via the endotracheal tube.
- Non-invasive mechanical ventilation may be associated with failure to stabilize circulatory shock. In this case, patients will be intubated and mechanically ventilated via the endotracheal tube.
- Non-invasive mechanical ventilation may be associated with aspiration. Accordingly, only patients with an intact airway protective gag reflex will be eligible for enrollment. Aspiration is also known to occur in patients who have an endotracheal tube. Care will be taken to monitor all patients in this study for this occurrence.

---

Figure 1: Endotracheal Tube

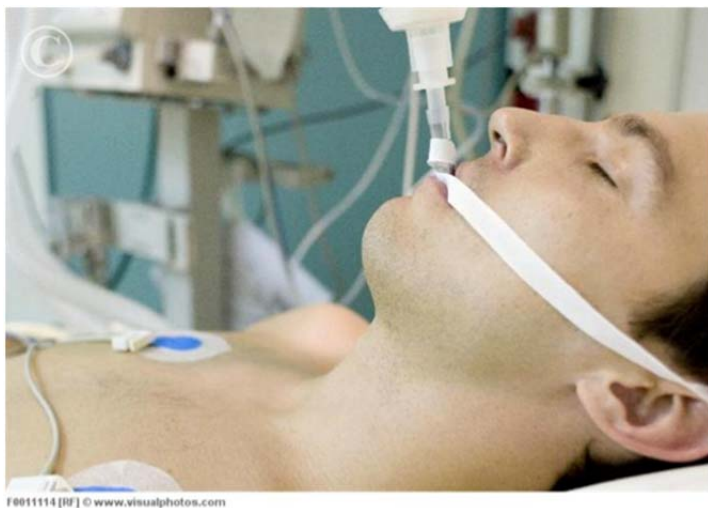

Figure 2: Facemask

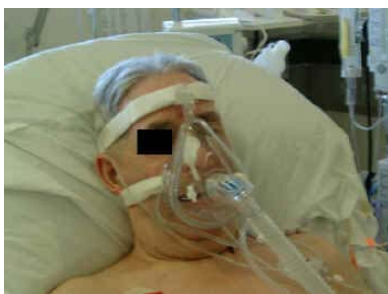

Figure 3: Helmet



**Appendix 1: ACUTE PHYSIOLOGY AND CHRONIC HEALTH EVALUATION  
(APACHE) II SCORING SYSTEM<sup>xxii</sup>**

|                   |                                                                                   | + 4                                                                                                                                                                                                                                                                                                                                                                                                                                                                                                                                                                                                                                                                                                                                                                                                                                                                                                                                                                                                                                                                                                                                                                                                                               | + 3                 | + 2      | + 1       | 0         | + 1       | + 2              | + 3     | + 4    | MINIMUM | MAXIMUM | SCORE |           |                                                      |                         |              |                                                        |                      |                  |                                                                                   |               |                      |                                    |                  |                  |                         |                                |                     |                   |                       |                          |                     |               |                           |  |               |  |               |  |               |  |  |  |
|-------------------|-----------------------------------------------------------------------------------|-----------------------------------------------------------------------------------------------------------------------------------------------------------------------------------------------------------------------------------------------------------------------------------------------------------------------------------------------------------------------------------------------------------------------------------------------------------------------------------------------------------------------------------------------------------------------------------------------------------------------------------------------------------------------------------------------------------------------------------------------------------------------------------------------------------------------------------------------------------------------------------------------------------------------------------------------------------------------------------------------------------------------------------------------------------------------------------------------------------------------------------------------------------------------------------------------------------------------------------|---------------------|----------|-----------|-----------|-----------|------------------|---------|--------|---------|---------|-------|-----------|------------------------------------------------------|-------------------------|--------------|--------------------------------------------------------|----------------------|------------------|-----------------------------------------------------------------------------------|---------------|----------------------|------------------------------------|------------------|------------------|-------------------------|--------------------------------|---------------------|-------------------|-----------------------|--------------------------|---------------------|---------------|---------------------------|--|---------------|--|---------------|--|---------------|--|--|--|
| PHYSIOLOGY        | VITAL SIGNS                                                                       | Temp °C                                                                                                                                                                                                                                                                                                                                                                                                                                                                                                                                                                                                                                                                                                                                                                                                                                                                                                                                                                                                                                                                                                                                                                                                                           | ≥ 41                | 39-40.9  | 38.5-38.9 | 36-38.4   | 34-35.9   | 32-33.9          | 30-31.9 | ≤ 29.9 |         |         |       |           |                                                      |                         |              |                                                        |                      |                  |                                                                                   |               |                      |                                    |                  |                  |                         |                                |                     |                   |                       |                          |                     |               |                           |  |               |  |               |  |               |  |  |  |
|                   |                                                                                   | BPs/d                                                                                                                                                                                                                                                                                                                                                                                                                                                                                                                                                                                                                                                                                                                                                                                                                                                                                                                                                                                                                                                                                                                                                                                                                             |                     |          |           |           |           |                  |         |        |         |         |       |           |                                                      |                         |              |                                                        |                      |                  |                                                                                   |               |                      |                                    |                  |                  |                         |                                |                     |                   |                       |                          |                     |               |                           |  |               |  |               |  |               |  |  |  |
|                   |                                                                                   | mean                                                                                                                                                                                                                                                                                                                                                                                                                                                                                                                                                                                                                                                                                                                                                                                                                                                                                                                                                                                                                                                                                                                                                                                                                              | ≥ 160               | 130-159  | 110-129   | 70-109    | 50-69     | ≤ 49             |         |        |         |         |       |           |                                                      |                         |              |                                                        |                      |                  |                                                                                   |               |                      |                                    |                  |                  |                         |                                |                     |                   |                       |                          |                     |               |                           |  |               |  |               |  |               |  |  |  |
|                   |                                                                                   | HR(vent)                                                                                                                                                                                                                                                                                                                                                                                                                                                                                                                                                                                                                                                                                                                                                                                                                                                                                                                                                                                                                                                                                                                                                                                                                          | ≥ 180               | 140-179  | 110-139   | 70-109    | 55-69     | 40-54            | ≤ 39    |        |         |         |       |           |                                                      |                         |              |                                                        |                      |                  |                                                                                   |               |                      |                                    |                  |                  |                         |                                |                     |                   |                       |                          |                     |               |                           |  |               |  |               |  |               |  |  |  |
|                   |                                                                                   | RR(otal)                                                                                                                                                                                                                                                                                                                                                                                                                                                                                                                                                                                                                                                                                                                                                                                                                                                                                                                                                                                                                                                                                                                                                                                                                          | ≥ 50                | 35-49    | 25-34     | 12-24     | 10-11     | 6-9              | ≤ 5     |        |         |         |       |           |                                                      |                         |              |                                                        |                      |                  |                                                                                   |               |                      |                                    |                  |                  |                         |                                |                     |                   |                       |                          |                     |               |                           |  |               |  |               |  |               |  |  |  |
|                   | OXYGENATION                                                                       | *ABC FiO <sub>2</sub>                                                                                                                                                                                                                                                                                                                                                                                                                                                                                                                                                                                                                                                                                                                                                                                                                                                                                                                                                                                                                                                                                                                                                                                                             |                     |          |           |           |           |                  |         |        |         |         |       |           |                                                      |                         |              |                                                        |                      |                  |                                                                                   |               |                      |                                    |                  |                  |                         |                                |                     |                   |                       |                          |                     |               |                           |  |               |  |               |  |               |  |  |  |
|                   |                                                                                   | PaO <sub>2</sub>                                                                                                                                                                                                                                                                                                                                                                                                                                                                                                                                                                                                                                                                                                                                                                                                                                                                                                                                                                                                                                                                                                                                                                                                                  |                     |          |           |           |           |                  |         |        |         |         |       |           |                                                      |                         |              |                                                        |                      |                  |                                                                                   |               |                      |                                    |                  |                  |                         |                                |                     |                   |                       |                          |                     |               |                           |  |               |  |               |  |               |  |  |  |
|                   |                                                                                   | PaCO <sub>2</sub>                                                                                                                                                                                                                                                                                                                                                                                                                                                                                                                                                                                                                                                                                                                                                                                                                                                                                                                                                                                                                                                                                                                                                                                                                 |                     |          |           |           |           |                  |         |        |         |         |       |           |                                                      |                         |              |                                                        |                      |                  |                                                                                   |               |                      |                                    |                  |                  |                         |                                |                     |                   |                       |                          |                     |               |                           |  |               |  |               |  |               |  |  |  |
|                   |                                                                                   | pH                                                                                                                                                                                                                                                                                                                                                                                                                                                                                                                                                                                                                                                                                                                                                                                                                                                                                                                                                                                                                                                                                                                                                                                                                                | ≥ 7.7               | 7.6-7.69 | 7.5-7.59  | 7.33-7.49 | 7.25-7.32 | 7.15-7.24        | < 7.15  |        |         |         |       |           |                                                      |                         |              |                                                        |                      |                  |                                                                                   |               |                      |                                    |                  |                  |                         |                                |                     |                   |                       |                          |                     |               |                           |  |               |  |               |  |               |  |  |  |
|                   |                                                                                   | AaDO <sub>2</sub>                                                                                                                                                                                                                                                                                                                                                                                                                                                                                                                                                                                                                                                                                                                                                                                                                                                                                                                                                                                                                                                                                                                                                                                                                 | ≥ 500               | 350-499  | 200-349   | < 200     |           |                  |         |        |         |         |       |           |                                                      |                         |              |                                                        |                      |                  |                                                                                   |               |                      |                                    |                  |                  |                         |                                |                     |                   |                       |                          |                     |               |                           |  |               |  |               |  |               |  |  |  |
| LABS              | serum CO <sub>2</sub>                                                             | ≥ 52                                                                                                                                                                                                                                                                                                                                                                                                                                                                                                                                                                                                                                                                                                                                                                                                                                                                                                                                                                                                                                                                                                                                                                                                                              | 41-51.9             | 32-40.9  | 22-31.9   | 18-21.9   | 15-17.9   | < 15             |         |        |         |         |       |           |                                                      |                         |              |                                                        |                      |                  |                                                                                   |               |                      |                                    |                  |                  |                         |                                |                     |                   |                       |                          |                     |               |                           |  |               |  |               |  |               |  |  |  |
|                   | Na+                                                                               | ≥ 180                                                                                                                                                                                                                                                                                                                                                                                                                                                                                                                                                                                                                                                                                                                                                                                                                                                                                                                                                                                                                                                                                                                                                                                                                             | 160-179             | 155-159  | 150-154   | 130-149   | 120-129   | 111-119          | ≤ 110   |        |         |         |       |           |                                                      |                         |              |                                                        |                      |                  |                                                                                   |               |                      |                                    |                  |                  |                         |                                |                     |                   |                       |                          |                     |               |                           |  |               |  |               |  |               |  |  |  |
|                   | K+                                                                                | ≥ 7                                                                                                                                                                                                                                                                                                                                                                                                                                                                                                                                                                                                                                                                                                                                                                                                                                                                                                                                                                                                                                                                                                                                                                                                                               | 6-6.9               | 5.5-5.9  | 3.5-5.4   | 3-3.4     | 2.5-2.9   | < 2.5            |         |        |         |         |       |           |                                                      |                         |              |                                                        |                      |                  |                                                                                   |               |                      |                                    |                  |                  |                         |                                |                     |                   |                       |                          |                     |               |                           |  |               |  |               |  |               |  |  |  |
|                   | **Creat                                                                           | ≥ 3.5                                                                                                                                                                                                                                                                                                                                                                                                                                                                                                                                                                                                                                                                                                                                                                                                                                                                                                                                                                                                                                                                                                                                                                                                                             | 2-3.4               | 1.5-1.9  | 0.6-1.4   | < 0.8     |           |                  |         |        |         |         |       |           |                                                      |                         |              |                                                        |                      |                  |                                                                                   |               |                      |                                    |                  |                  |                         |                                |                     |                   |                       |                          |                     |               |                           |  |               |  |               |  |               |  |  |  |
|                   | Hct                                                                               | ≥ 60                                                                                                                                                                                                                                                                                                                                                                                                                                                                                                                                                                                                                                                                                                                                                                                                                                                                                                                                                                                                                                                                                                                                                                                                                              | 50-59.9             | 46-49.9  | 30-45.9   | 20-29.9   | < 20      |                  |         |        |         |         |       |           |                                                      |                         |              |                                                        |                      |                  |                                                                                   |               |                      |                                    |                  |                  |                         |                                |                     |                   |                       |                          |                     |               |                           |  |               |  |               |  |               |  |  |  |
| WBC               | ≥ 40                                                                              | 20-39.9                                                                                                                                                                                                                                                                                                                                                                                                                                                                                                                                                                                                                                                                                                                                                                                                                                                                                                                                                                                                                                                                                                                                                                                                                           | 15-19.9             | 3-14.9   | 1-2.9     | < 1       |           |                  |         |        |         |         |       |           |                                                      |                         |              |                                                        |                      |                  |                                                                                   |               |                      |                                    |                  |                  |                         |                                |                     |                   |                       |                          |                     |               |                           |  |               |  |               |  |               |  |  |  |
| GLASGOW COMA      | APACHE                                                                            | 0                                                                                                                                                                                                                                                                                                                                                                                                                                                                                                                                                                                                                                                                                                                                                                                                                                                                                                                                                                                                                                                                                                                                                                                                                                 | +1                  | +2       | +3        | +4        | +5        | +6               | +7      | +8     | +9      | +10     | +11   | +12       | SCORE                                                |                         |              |                                                        |                      |                  |                                                                                   |               |                      |                                    |                  |                  |                         |                                |                     |                   |                       |                          |                     |               |                           |  |               |  |               |  |               |  |  |  |
|                   | GC SCORE                                                                          | 15                                                                                                                                                                                                                                                                                                                                                                                                                                                                                                                                                                                                                                                                                                                                                                                                                                                                                                                                                                                                                                                                                                                                                                                                                                | 14                  | 13       | 12        | 11        | 10        | 9                | 8       | 7      | 6       | 5       | 4     | 3         |                                                      |                         |              |                                                        |                      |                  |                                                                                   |               |                      |                                    |                  |                  |                         |                                |                     |                   |                       |                          |                     |               |                           |  |               |  |               |  |               |  |  |  |
|                   | (Circle appropriate score for each category)                                      | <table border="0" style="width: 100%; border-collapse: collapse;"> <tr> <td style="width: 25%;"></td> <td style="width: 25%; text-align: center;"><b>VERBAL NON-INTUBATED</b></td> <td style="width: 25%; text-align: center;"><b>VERBAL INTUBATED</b></td> <td style="width: 25%; text-align: center;"><b>MOTOR</b></td> </tr> <tr> <td style="text-align: center;"><b>EYE</b></td> <td style="text-align: center;"><b>NON-INTUBATED</b></td> <td style="text-align: center;"><b>INTUBATED</b></td> <td style="text-align: center;"><b>MOTOR</b></td> </tr> <tr> <td>4 SPONTANEOUS</td> <td>5 ORIENTED AND TALKS</td> <td>5 SEEMS ABLE TO TALK</td> <td>6 VERBAL COMMAND</td> </tr> <tr> <td>3 VERBAL COMMAND</td> <td>4 DISORIENTED &amp; TALKS</td> <td>3 QUESTIONABLE ABILITY TO TALK</td> <td>5 LOCALIZES TO PAIN</td> </tr> <tr> <td>2 PAINFUL STIMULI</td> <td>3 INAPPROPRIATE WORDS</td> <td>1 GENERALLY UNRESPONSIVE</td> <td>4 WITHDRAWS TO PAIN</td> </tr> <tr> <td>1 NO RESPONSE</td> <td>2 INCOMPREHENSIBLE SOUNDS</td> <td></td> <td>3 DECORTICATE</td> </tr> <tr> <td></td> <td>1 NO RESPONSE</td> <td></td> <td>2 DECEREBRATE</td> </tr> <tr> <td></td> <td></td> <td></td> <td>1 NO RESPONSE</td> </tr> </table> |                     |          |           |           |           |                  |         |        |         |         |       |           | <b>VERBAL NON-INTUBATED</b>                          | <b>VERBAL INTUBATED</b> | <b>MOTOR</b> | <b>EYE</b>                                             | <b>NON-INTUBATED</b> | <b>INTUBATED</b> | <b>MOTOR</b>                                                                      | 4 SPONTANEOUS | 5 ORIENTED AND TALKS | 5 SEEMS ABLE TO TALK               | 6 VERBAL COMMAND | 3 VERBAL COMMAND | 4 DISORIENTED & TALKS   | 3 QUESTIONABLE ABILITY TO TALK | 5 LOCALIZES TO PAIN | 2 PAINFUL STIMULI | 3 INAPPROPRIATE WORDS | 1 GENERALLY UNRESPONSIVE | 4 WITHDRAWS TO PAIN | 1 NO RESPONSE | 2 INCOMPREHENSIBLE SOUNDS |  | 3 DECORTICATE |  | 1 NO RESPONSE |  | 2 DECEREBRATE |  |  |  |
|                   | <b>VERBAL NON-INTUBATED</b>                                                       | <b>VERBAL INTUBATED</b>                                                                                                                                                                                                                                                                                                                                                                                                                                                                                                                                                                                                                                                                                                                                                                                                                                                                                                                                                                                                                                                                                                                                                                                                           | <b>MOTOR</b>        |          |           |           |           |                  |         |        |         |         |       |           |                                                      |                         |              |                                                        |                      |                  |                                                                                   |               |                      |                                    |                  |                  |                         |                                |                     |                   |                       |                          |                     |               |                           |  |               |  |               |  |               |  |  |  |
| <b>EYE</b>        | <b>NON-INTUBATED</b>                                                              | <b>INTUBATED</b>                                                                                                                                                                                                                                                                                                                                                                                                                                                                                                                                                                                                                                                                                                                                                                                                                                                                                                                                                                                                                                                                                                                                                                                                                  | <b>MOTOR</b>        |          |           |           |           |                  |         |        |         |         |       |           |                                                      |                         |              |                                                        |                      |                  |                                                                                   |               |                      |                                    |                  |                  |                         |                                |                     |                   |                       |                          |                     |               |                           |  |               |  |               |  |               |  |  |  |
| 4 SPONTANEOUS     | 5 ORIENTED AND TALKS                                                              | 5 SEEMS ABLE TO TALK                                                                                                                                                                                                                                                                                                                                                                                                                                                                                                                                                                                                                                                                                                                                                                                                                                                                                                                                                                                                                                                                                                                                                                                                              | 6 VERBAL COMMAND    |          |           |           |           |                  |         |        |         |         |       |           |                                                      |                         |              |                                                        |                      |                  |                                                                                   |               |                      |                                    |                  |                  |                         |                                |                     |                   |                       |                          |                     |               |                           |  |               |  |               |  |               |  |  |  |
| 3 VERBAL COMMAND  | 4 DISORIENTED & TALKS                                                             | 3 QUESTIONABLE ABILITY TO TALK                                                                                                                                                                                                                                                                                                                                                                                                                                                                                                                                                                                                                                                                                                                                                                                                                                                                                                                                                                                                                                                                                                                                                                                                    | 5 LOCALIZES TO PAIN |          |           |           |           |                  |         |        |         |         |       |           |                                                      |                         |              |                                                        |                      |                  |                                                                                   |               |                      |                                    |                  |                  |                         |                                |                     |                   |                       |                          |                     |               |                           |  |               |  |               |  |               |  |  |  |
| 2 PAINFUL STIMULI | 3 INAPPROPRIATE WORDS                                                             | 1 GENERALLY UNRESPONSIVE                                                                                                                                                                                                                                                                                                                                                                                                                                                                                                                                                                                                                                                                                                                                                                                                                                                                                                                                                                                                                                                                                                                                                                                                          | 4 WITHDRAWS TO PAIN |          |           |           |           |                  |         |        |         |         |       |           |                                                      |                         |              |                                                        |                      |                  |                                                                                   |               |                      |                                    |                  |                  |                         |                                |                     |                   |                       |                          |                     |               |                           |  |               |  |               |  |               |  |  |  |
| 1 NO RESPONSE     | 2 INCOMPREHENSIBLE SOUNDS                                                         |                                                                                                                                                                                                                                                                                                                                                                                                                                                                                                                                                                                                                                                                                                                                                                                                                                                                                                                                                                                                                                                                                                                                                                                                                                   | 3 DECORTICATE       |          |           |           |           |                  |         |        |         |         |       |           |                                                      |                         |              |                                                        |                      |                  |                                                                                   |               |                      |                                    |                  |                  |                         |                                |                     |                   |                       |                          |                     |               |                           |  |               |  |               |  |               |  |  |  |
|                   | 1 NO RESPONSE                                                                     |                                                                                                                                                                                                                                                                                                                                                                                                                                                                                                                                                                                                                                                                                                                                                                                                                                                                                                                                                                                                                                                                                                                                                                                                                                   | 2 DECEREBRATE       |          |           |           |           |                  |         |        |         |         |       |           |                                                      |                         |              |                                                        |                      |                  |                                                                                   |               |                      |                                    |                  |                  |                         |                                |                     |                   |                       |                          |                     |               |                           |  |               |  |               |  |               |  |  |  |
|                   |                                                                                   |                                                                                                                                                                                                                                                                                                                                                                                                                                                                                                                                                                                                                                                                                                                                                                                                                                                                                                                                                                                                                                                                                                                                                                                                                                   | 1 NO RESPONSE       |          |           |           |           |                  |         |        |         |         |       |           |                                                      |                         |              |                                                        |                      |                  |                                                                                   |               |                      |                                    |                  |                  |                         |                                |                     |                   |                       |                          |                     |               |                           |  |               |  |               |  |               |  |  |  |
| AGE & HEALTH      | AGE                                                                               | 0                                                                                                                                                                                                                                                                                                                                                                                                                                                                                                                                                                                                                                                                                                                                                                                                                                                                                                                                                                                                                                                                                                                                                                                                                                 | +2                  | +3       | +5        | +6        |           |                  |         |        |         |         | SCORE |           |                                                      |                         |              |                                                        |                      |                  |                                                                                   |               |                      |                                    |                  |                  |                         |                                |                     |                   |                       |                          |                     |               |                           |  |               |  |               |  |               |  |  |  |
|                   | Age Score                                                                         | ≤ 44                                                                                                                                                                                                                                                                                                                                                                                                                                                                                                                                                                                                                                                                                                                                                                                                                                                                                                                                                                                                                                                                                                                                                                                                                              | 45-54               | 55-64    | 65-74     | ≥ 75      |           |                  |         |        |         |         | SCORE |           |                                                      |                         |              |                                                        |                      |                  |                                                                                   |               |                      |                                    |                  |                  |                         |                                |                     |                   |                       |                          |                     |               |                           |  |               |  |               |  |               |  |  |  |
|                   | CH Score                                                                          |                                                                                                                                                                                                                                                                                                                                                                                                                                                                                                                                                                                                                                                                                                                                                                                                                                                                                                                                                                                                                                                                                                                                                                                                                                   |                     |          |           |           |           |                  |         |        |         |         |       |           |                                                      |                         |              |                                                        |                      |                  |                                                                                   |               |                      |                                    |                  |                  |                         |                                |                     |                   |                       |                          |                     |               |                           |  |               |  |               |  |               |  |  |  |
|                   | CH Scale                                                                          | +5                                                                                                                                                                                                                                                                                                                                                                                                                                                                                                                                                                                                                                                                                                                                                                                                                                                                                                                                                                                                                                                                                                                                                                                                                                |                     |          |           |           |           | +2               |         |        |         |         |       |           |                                                      |                         |              |                                                        |                      |                  |                                                                                   |               |                      |                                    |                  |                  |                         |                                |                     |                   |                       |                          |                     |               |                           |  |               |  |               |  |               |  |  |  |
|                   |                                                                                   | NON-OP or EMERGENCY-OP                                                                                                                                                                                                                                                                                                                                                                                                                                                                                                                                                                                                                                                                                                                                                                                                                                                                                                                                                                                                                                                                                                                                                                                                            |                     |          |           |           |           | ELECTIVE POST-OP |         |        |         |         |       |           |                                                      |                         |              |                                                        |                      |                  |                                                                                   |               |                      |                                    |                  |                  |                         |                                |                     |                   |                       |                          |                     |               |                           |  |               |  |               |  |               |  |  |  |
|                   |                                                                                   | <b>WITH ANY 1 OF THE FOLLOWING CHRONIC CONDITIONS PRIOR TO THIS ILLNESS:</b><br>IF APPLIES, CIRCLE THE NUMBER CORRESPONDING TO THE CONDITION. <table border="0" style="width: 100%; margin-top: 5px;"> <tr> <td style="width: 33%;">1 LIVER -</td> <td style="width: 33%;">CIRRHOSIS WITH PORTAL HYPERTENSION or ENCEPHALOPATHY</td> <td style="width: 33%;"></td> </tr> <tr> <td>2 CVASC -</td> <td>CLASS IV ANGINA or AT REST or MIN SELF-CARE ACTIVITIES</td> <td></td> </tr> <tr> <td>3 PULM -</td> <td>CHRONIC HYPOX or HYPERCAP or POLYCYTHEMIA or PHT &gt;40 MMHG or RESPIRATOR DEPENDENT</td> <td></td> </tr> <tr> <td>4 KIDNEY -</td> <td>CHRONIC PERITONEAL or HEMODIALYSIS</td> <td></td> </tr> <tr> <td>5 IMMUNE -</td> <td>IMMUNO COMPROMISED HOST</td> <td></td> </tr> </table>                                                                                                                                                                                                                                                                                                                                                                                                                                     |                     |          |           |           |           |                  |         |        |         |         |       | 1 LIVER - | CIRRHOSIS WITH PORTAL HYPERTENSION or ENCEPHALOPATHY |                         | 2 CVASC -    | CLASS IV ANGINA or AT REST or MIN SELF-CARE ACTIVITIES |                      | 3 PULM -         | CHRONIC HYPOX or HYPERCAP or POLYCYTHEMIA or PHT >40 MMHG or RESPIRATOR DEPENDENT |               | 4 KIDNEY -           | CHRONIC PERITONEAL or HEMODIALYSIS |                  | 5 IMMUNE -       | IMMUNO COMPROMISED HOST |                                |                     |                   |                       |                          |                     |               |                           |  |               |  |               |  |               |  |  |  |
| 1 LIVER -         | CIRRHOSIS WITH PORTAL HYPERTENSION or ENCEPHALOPATHY                              |                                                                                                                                                                                                                                                                                                                                                                                                                                                                                                                                                                                                                                                                                                                                                                                                                                                                                                                                                                                                                                                                                                                                                                                                                                   |                     |          |           |           |           |                  |         |        |         |         |       |           |                                                      |                         |              |                                                        |                      |                  |                                                                                   |               |                      |                                    |                  |                  |                         |                                |                     |                   |                       |                          |                     |               |                           |  |               |  |               |  |               |  |  |  |
| 2 CVASC -         | CLASS IV ANGINA or AT REST or MIN SELF-CARE ACTIVITIES                            |                                                                                                                                                                                                                                                                                                                                                                                                                                                                                                                                                                                                                                                                                                                                                                                                                                                                                                                                                                                                                                                                                                                                                                                                                                   |                     |          |           |           |           |                  |         |        |         |         |       |           |                                                      |                         |              |                                                        |                      |                  |                                                                                   |               |                      |                                    |                  |                  |                         |                                |                     |                   |                       |                          |                     |               |                           |  |               |  |               |  |               |  |  |  |
| 3 PULM -          | CHRONIC HYPOX or HYPERCAP or POLYCYTHEMIA or PHT >40 MMHG or RESPIRATOR DEPENDENT |                                                                                                                                                                                                                                                                                                                                                                                                                                                                                                                                                                                                                                                                                                                                                                                                                                                                                                                                                                                                                                                                                                                                                                                                                                   |                     |          |           |           |           |                  |         |        |         |         |       |           |                                                      |                         |              |                                                        |                      |                  |                                                                                   |               |                      |                                    |                  |                  |                         |                                |                     |                   |                       |                          |                     |               |                           |  |               |  |               |  |               |  |  |  |
| 4 KIDNEY -        | CHRONIC PERITONEAL or HEMODIALYSIS                                                |                                                                                                                                                                                                                                                                                                                                                                                                                                                                                                                                                                                                                                                                                                                                                                                                                                                                                                                                                                                                                                                                                                                                                                                                                                   |                     |          |           |           |           |                  |         |        |         |         |       |           |                                                      |                         |              |                                                        |                      |                  |                                                                                   |               |                      |                                    |                  |                  |                         |                                |                     |                   |                       |                          |                     |               |                           |  |               |  |               |  |               |  |  |  |
| 5 IMMUNE -        | IMMUNO COMPROMISED HOST                                                           |                                                                                                                                                                                                                                                                                                                                                                                                                                                                                                                                                                                                                                                                                                                                                                                                                                                                                                                                                                                                                                                                                                                                                                                                                                   |                     |          |           |           |           |                  |         |        |         |         |       |           |                                                      |                         |              |                                                        |                      |                  |                                                                                   |               |                      |                                    |                  |                  |                         |                                |                     |                   |                       |                          |                     |               |                           |  |               |  |               |  |               |  |  |  |

\*IF NO ABG USE SERUM CO<sub>2</sub>

\*\*IF IN ARF DOUBLE THE CREATININE POINT SCORE

|           |                             |  |
|-----------|-----------------------------|--|
| APACHE II | Physiology Points           |  |
|           | Glasgow points              |  |
|           | Chronic Health Points       |  |
|           | Age Points                  |  |
|           | <b>APACHE SCORE (TOTAL)</b> |  |

## Appendix 2: Serial Organ Function Assessment[18]<sup>xxii</sup>

| SOFA score                                                                              | 1            | 2                                        | 3                                       | 4              |
|-----------------------------------------------------------------------------------------|--------------|------------------------------------------|-----------------------------------------|----------------|
|                                                                                         |              |                                          | Respiration with respiratory support    |                |
| Respiration with respiratory support<br>PaO <sub>2</sub> /FiO <sub>2</sub> , mmHg       | < 400        | < 300                                    | < 200                                   | < 100          |
| Coagulation<br>Platelets x10 <sup>3</sup> /mm <sup>3</sup>                              | < 150        | < 100                                    | < 50                                    | < 20           |
| Liver<br>Bilirubin, mg/dl                                                               | 1.2-1.9      | 2-5.9                                    | 6-11.9                                  | > 12           |
| Cardiovascular<br>Hypotension<br>>15 or<br>(doses in ug/kg·min)<br>catecholamines > 0,1 | MAP < 70mmHg | Dopamine ≤ 5 or<br>Dobutamine (any dose) | Dopamine > 5 or<br>catecholamines ≤ 0.1 | Dopamine       |
| Neurologic<br>Glasgow Coma Score                                                        | 13-14        | 10-12                                    | 6-9                                     | < 6            |
| Renal<br>Creatinine mg/dl or<br>Urine output ml/zi                                      | 1.2-1.9      | 2-3.4                                    | 3.5-4.9<br>(200-500)                    | > 5<br>(< 200) |

### Appendix 3. Richmond agitation–sedation scale<sup>xxii</sup>



**TABLE 1. RICHMOND AGITATION–SEDATION SCALE**

| Score | Term              | Description                                                                                     |
|-------|-------------------|-------------------------------------------------------------------------------------------------|
| +4    | Combative         | Overtly combative or violent; immediate danger to staff                                         |
| +3    | Very agitation    | Pulls on or removes tube(s) or catheter(s) or has aggressive behavior toward staff              |
| +2    | Agitated          | Frequent nonpurposeful movement or patient–ventilator dyssynchrony                              |
| +1    | Restless          | Anxious or apprehensive but movements not aggressive or vigorous                                |
| 0     | Alert and calm    |                                                                                                 |
| –1    | Drowsy            | Not fully alert, but has sustained (more than 10 seconds) awakening, with eye contact, to voice |
| –2    | Light sedation    | Briefly (less than 10 seconds) awakens with eye contact to voice                                |
| –3    | Moderate sedation | Any movement (but no eye contact) to voice                                                      |
| –4    | Deep sedation     | No response to voice, but any movement to physical stimulation                                  |
| –5    | Unarousable       | No response to voice or physical stimulation                                                    |

**Procedure**

1. Observe patient. Is patient alert and calm (score 0)?  
Does patient have behavior that is consistent with restlessness or agitation (score +1 to +4 using the criteria listed above, under DESCRIPTION)?
2. If patient is not alert, in a loud speaking voice state patient’s name and direct patient to open eyes and look at speaker. Repeat once if necessary. Can prompt patient to continue looking at speaker.  
Patient has eye opening and eye contact, which is sustained for more than 10 seconds (score –1).  
Patient has eye opening and eye contact, but this is not sustained for 10 seconds (score –2).  
Patient has any movement in response to voice, excluding eye contact (score –3).
3. If patient does not respond to voice, physically stimulate patient by shaking shoulder and then rubbing sternum if there is no response to shaking shoulder.  
Patient has any movement to physical stimulation (score –4).  
Patient has no response to voice or physical stimulation (score –5).

**APPENDIX 4: Confusion Assessment Method (CAM-ICU)<sup>xxii</sup>**

| Features and Descriptions                                                                                                                                                                                                                                                                                                                                                                                                                                                                                                                                                                                                                                                                                                                                                                                                                                                                                                                                                                              | Absent | Present |
|--------------------------------------------------------------------------------------------------------------------------------------------------------------------------------------------------------------------------------------------------------------------------------------------------------------------------------------------------------------------------------------------------------------------------------------------------------------------------------------------------------------------------------------------------------------------------------------------------------------------------------------------------------------------------------------------------------------------------------------------------------------------------------------------------------------------------------------------------------------------------------------------------------------------------------------------------------------------------------------------------------|--------|---------|
| <b>I. Acute onset or fluctuating course*</b>                                                                                                                                                                                                                                                                                                                                                                                                                                                                                                                                                                                                                                                                                                                                                                                                                                                                                                                                                           |        |         |
| A. Is there evidence of an acute change in mental status from the baseline?<br>B. Or, did the (abnormal) behavior fluctuate during the past 24 hours, that is, tend to come and go or increase and decrease in severity as evidenced by fluctuations on the Richmond Agitation Sedation Scale (RASS) or the Glasgow Coma Scale?                                                                                                                                                                                                                                                                                                                                                                                                                                                                                                                                                                                                                                                                        |        |         |
| <b>II. Inattention†</b>                                                                                                                                                                                                                                                                                                                                                                                                                                                                                                                                                                                                                                                                                                                                                                                                                                                                                                                                                                                |        |         |
| Did the patient have difficulty focusing attention as evidenced by a score of less than 8 correct answers on either the visual or auditory components of the Attention Screening Examination (ASE)?                                                                                                                                                                                                                                                                                                                                                                                                                                                                                                                                                                                                                                                                                                                                                                                                    |        |         |
| <b>III. Disorganized thinking</b>                                                                                                                                                                                                                                                                                                                                                                                                                                                                                                                                                                                                                                                                                                                                                                                                                                                                                                                                                                      |        |         |
| Is there evidence of disorganized or incoherent thinking as evidenced by incorrect answers to 3 or more of the 4 questions and inability to follow the commands?<br>Questions<br>1. Will a stone float on water?<br>2. Are there fish in the sea?<br>3. Does 1 pound weigh more than 2 pounds?<br>4. Can you use a hammer to pound a nail?<br>Commands<br>1. Are you having unclear thinking?<br>2. Hold up this many fingers. (Examiner holds 2 fingers in front of the patient.)<br>3. Now do the same thing with the other hand (without holding the 2 fingers in front of the patient).<br>(If the patient is already extubated from the ventilator, determine whether the patient's thinking is disorganized or incoherent, such as rambling or irrelevant conversation, unclear or illogical flow of ideas, or unpredictable switching from subject to subject.)                                                                                                                                 |        |         |
| <b>IV. Altered level of consciousness</b>                                                                                                                                                                                                                                                                                                                                                                                                                                                                                                                                                                                                                                                                                                                                                                                                                                                                                                                                                              |        |         |
| Is the patient's level of consciousness anything other than alert, such as being vigilant or lethargic or in a stupor, or coma?<br>Alert: spontaneously fully aware of environment and interacts appropriately<br>Vigilant: hyperalert<br>Lethargic: drowsy but easily aroused, unaware of some elements in the environment or not spontaneously interacting with the interviewer; becomes fully aware and appropriately interactive when prodded minimally<br>Stupor: difficult to arouse, unaware of some or all elements in the environment or not spontaneously interacting with the interviewer; becomes incompletely aware when prodded strongly; can be aroused only by vigorous and repeated stimuli and as soon as the stimulus ceases, stuporous subject lapses back into unresponsive state<br>Coma: unarousable, unaware of all elements in the environment with no spontaneous interaction or awareness of the interviewer so that the interview is impossible even with maximal prodding |        |         |
| <b>Overall CAM-ICU Assessment (Features 1 and 2 and either Feature 3 or 4): Yes___ No___</b>                                                                                                                                                                                                                                                                                                                                                                                                                                                                                                                                                                                                                                                                                                                                                                                                                                                                                                           |        |         |

\*The scores included in the 10-point RASS range from a high of 4 (combative) to a low of -5 (deeply comatose and unresponsive). Under the RASS system, patients who were spontaneously alert, calm, and not agitated were scored at 0 (neutral zone). Anxious or agitated patients received a range of scores depending on their level of anxiety: 1 for anxious, 2 for agitated (fighting ventilator), 3 for very agitated (pulling on or removing catheters), or 4 for combative (violent and a danger to staff). The scores -1 to -5 were assigned for patients with varying degrees of sedation based on their ability to maintain eye contact: -1 for more than 10 seconds, -2 for less than 10 seconds, and -3 for eye opening but no eye contact. If physical stimulation was required, then the patients were scored as either -4 for eye opening or movement with physical or painful stimulation or -5 for no response to physical or painful stimulation. The RASS has excellent interrater reliability and intraclass correlation coefficients of 0.95 and 0.97, respectively, and has been validated against visual analog scale and geropsychiatric diagnoses in 2 ICU studies.<sup>37,38</sup>

†In completing the visual ASE, the patients were shown 5 simple pictures (previously published<sup>39</sup>) at 3-second intervals and asked to remember them. They were then immediately shown 10 subsequent pictures and asked to nod "yes" or "no" to indicate whether they had or had not just seen each of the pictures. Since 5 pictures had been shown to them already, for which the correct response was to nod "yes," and 5 others were new, for which the correct response was to shake their heads "no," patients scored perfectly if they achieved 10 correct responses. Scoring accounted for either errors of omission (indicating "no" for a previously shown picture) or for errors of commission (indicating "yes" for a picture not previously shown). In completing the auditory ASE, patients were asked to squeeze the rater's hand whenever they heard the letter A during the recitation of a series of 10 letters. The rater then read 10 letters from the following list in a normal tone at a rate of 1 letter per second: S, A, H, E, V, A, A, R, A, T. A scoring method similar to that of the visual ASE was used for the auditory ASE testing.

This table may be reproduced without permission for clinical use only (Ely EW et al. *JAMA*. 2001;286:2707-2710).

## Appendix 5: Telephone Survey

---

We would like to ask you (the PATIENT) some questions about your (the PATIENT'S) health:

- In general, how would you say your health is now?
  - Excellent
  - Very good
  - Good
  - Fair
  - Poor
  
- Sometimes it is necessary to spend most of the day in bed. Is this true for you now?
  - Yes
  - No
  - Don't know
  
- Have you fallen since discharge/since the last time our team talked with you by phone?
  - Yes
  - No
  - Don't know
  
- If you have fallen since discharge/since the last time our team talked with you by phone, did you see a doctor or go to an emergency department to get checked out after the fall?
  - Yes
  - No
  - Don't know
  
- Have you been admitted to a hospital since your hospital discharge/the last time our team spoke with you by phone?
  - Yes
  - No
  - Don't know
  
- Since discharge or the last time our team spoke with you, have you spent any time living in a nursing home, group home/assisted living facility, or rehabilitation facility?
  - Yes
  - No
  - Don't know

- 
- Did (you/PATIENT) need help washing or bathing (yourself/HIMSELF/HERSELF)?

Yes  
 No  
 Don't know

- Do you need help dressing and undressing?

Yes  
 No  
 Don't know

- Do you need help eating, including cutting food?

Yes  
 No  
 Don't know

- Do you need help getting in and out of the bed and a chair?

Yes  
 No  
 Don't know

- Do you need help cleaning yourself for either bowel or bladder functions?

Yes  
 No  
 Don't know

- Do you sometimes have an accident with your bowels either during the day or night?

Yes  
 No  
 Don't know

- Do you sometimes wet yourself either during the day or night?

Yes  
 No  
 Don't know

**Do you do the following on your own (NO HELP), with some help, or are you unable to:**

---

- Use the telephone, including looking up and dialing numbers, and answering the phone?

- On own/no help
- Some help
- Unable to do this
- Don't know

- Get to places out of walking distance by using public transportation or driving your car?

- On own/no help
- Some help
- Unable to do this
- Don't know

- Shop for groceries or clothes?

- On own/no help
- Some help
- Unable to do this
- Don't know

- Prepare, serve and provide meals for yourself?

- On own/no help
- Some help
- Unable to do this
- Don't know

- Do light housework, such as dusting or doing dishes?

- On own/no help
- Some help
- Unable to do this
- Don't know

- Take pills or medicines in the correct amounts and at the correct times?

- On own/no help
- Some help
- Unable to do this
- Don't know

- Handle your own money, including writing checks and paying bills?

- 
- On own/no help
  - Some help
  - Unable to do this
  - Don't know

- Do your laundry?
  - On own/no help
  - Some help
  - Unable to do this
  - Don't know

- Walk across the room either on your own or with a cane or walker?
  - On own/no help
  - Some help
  - Unable to do this
  - Don't know

The following questions are about your living situation.

- Where do you currently live?
  - Your (the PATIENT'S) own apartment or house
  - A relative or friend's apartment or house
  - A nursing home, group home/assisted living facility, or long-term care facility
  - A homeless shelter
  - Other\_\_\_\_\_
  
- How many people live with you (the PATIENT)? \_\_\_\_\_
  
- What is your current weight? \_\_\_\_\_
  
- If you (the PATIENT) need extra help when you get home from the hospital, is there someone who can help you (the PATIENT)?
  - No
  - Yes

---

If "Yes", what is this person's relationship to you (the PATIENT)?

|                   |   |                               |    |
|-------------------|---|-------------------------------|----|
| Spouse            | 1 | Neighbor or landlord          | 7  |
| Other partner     | 2 | Other friend                  | 8  |
| Child             | 3 | Floor nurse                   | 9  |
| Parent            | 4 | Visiting nurse                | 10 |
| Brother or sister | 5 | Home attendant or health aide | 11 |
| Other relative    | 6 | Some other person             | 12 |
| (specify)         |   | (specify)                     |    |

- What does this person do during the day if he/she is not helping you (the PATIENT)?
  - Work outside the home without pay
  - Work outside the home for pay
  - Work in the home without pay
  - Work in the home for pay
  - Other (specify) \_\_\_\_\_
  
- How old is this person?
  - Under 18
  - 18-49
  - 50-64
  - 65-74
  - 75-84
  - 85-89
  - 90 or greater

---

## Statistical Considerations

### Randomization

Patients are randomized 1:1 to the two arms (mask ventilation or helmet ventilation) by prepared sealed envelopes.

### Primary Endpoint

The primary outcome measure is the proportion of patients requiring and undergoing endotracheal intubation (timeframe). In our experience in the medical ICU, approximately 50% of all patients who require non-invasive ventilation via facemask ultimately require invasive endotracheal intubation. This trial will target an absolute reduction of this failure rate of 20% (and equivalent to a relative reduction of 40%), resulting in 30% of patients on helmet noninvasive ventilation requiring endotracheal intubation.

### Power and Sample Size

We specify two-sided (type I error)  $\alpha = 0.05$  and seek power of 80% for the effect size control group rate and effect size above, leading to a sample size requirement of 103 patients in each group (206 total patients). As the sample size for this endpoint depends in part on the control (facemask) group intubation rate, and depending on this rate, different improvements might be considered a clinically material gain, sample size is shown for a range of control group rates and relative reductions (the first column represents a 40% reduction in the rate of the rate as planned in this study).

| Control Group Intubation Rate | N per group (rate) for 40% relative reduction | N per group (rate) for 50% relative reduction |
|-------------------------------|-----------------------------------------------|-----------------------------------------------|
| 0.40                          | 145 (0.24)                                    | 91 (0.20)                                     |
| 0.45                          | 122 (0.27)                                    | 77 (0.225)                                    |
| 0.50                          | 103 (0.30)                                    | 66 (0.250)                                    |
| 0.55                          | 88 (0.33)                                     | 57 (0.275)                                    |

It can be seen that approximately 105 patients/arm will be adequate for detecting reductions in intubation rate of 40% or larger, when control group intubation rates in the range of 47.5%-50%. During the trial, the control group rate will be reassessed in order to determine if sample size adjustment (based on the control group rate only, not the effect size) is warranted.

### Analytic Methods

The primary analysis will involve testing for a difference of proportions between the two randomized groups, if there are imbalances in patient characteristics between groups, analysis



using logistic regression to will be used to provide a test adjusted for differences in these factors. Stratified table analysis may also be employed.

### Interim Monitoring

Safety and study conduct will be monitored continuously by the investigators and reviewed periodically by an independent Data and Safety Monitoring Board (DSMB). The assumed control group intubation rate as stated above is 50%, Since the statistical power at a given sample size depends on this parameter, it will be inspected at the time of interim analysis to determine if there is a strong deviation from this anticipated rate. If the rate differs by more than 10%, then sample size adjustment may be considered. Note that this re-assessment is independent of the specified effect size, and thus does not alter the operating characteristics of the trial with respect to alpha level and power.

Statistical monitoring for the primary endpoint will be conducted to determine if early trial stopping warrants consideration (at the pre-specified alternative hypothesis of a 40% relative reduction in intubation rate), The study will primarily monitored for futility, or early determination that the two groups are unlikely to differ with respect to the primary endpoint (intubation rate). A futility boundary will be established via conditional power, defined as Pr (reject  $H_0$  at end of trial current data and assumed  $H_1$  effect), If this probability is sufficiently small, then stopping at a given point prior to the planned trial end may be justified. Here, we will consider conditional power approaching 20% as warranting consideration of early stopping.

Early stopping for efficacy in this trial would only be considered under extraordinary evidence of benefit, and thus an extreme significance level will be specified for early rejection of the null hypothesis and declaration that the helmet strategy is superior. This specification has the advantage of having no material effect on significance level for the definitive hypothesis test at study end.

The following table provides the criteria for the primary endpoint monitoring plan.

| Analysis after assessment of | Fraction of total information | Efficacy Stopping: |       | Futility Stopping: Consider stop if: |       |
|------------------------------|-------------------------------|--------------------|-------|--------------------------------------|-------|
|                              |                               | Z >                | P <   | Z <                                  | P >   |
| 35 patients per group        | 0.333                         | 3.08               | 0.001 | -0.966                               | 0.833 |
| 70 patients per group        | 0.667                         | 3.08               | 0.001 | 0.678                                | 0.249 |
| Final Test (105/group)       | 1.00                          | 1.96               | 0.025 | ---                                  | ---   |

It is noted that these boundaries serve as guidelines for the investigators and DSMB, and decisions should be made in conjunction with other information from the trial.
